# Supplementary material
Source: publisher site journal article supplement (https://www.spandidos-publications.com/8657/downloadSupplementary)
Supplement: Supplementary file 1 [file downloadSupplementary]

## Sheet: Sheet1
Table SII. SMR analysis on eQTL and GWAS datasets.
Outcome	probeID	ProbeChr	Gene	Probe_bp	topSNP	topSNP_chr	topSNP_bp	A1	A2	Freq	b_GWAS	se_GWAS	p_GWAS	b_eQTL	se_eQTL	p_eQTL	b_SMR	se_SMR	p_SMR	p_HEIDI	nsnp_HEIDI	lo_ci	up_ci	or	or_lci95	or_uci95	OR (95%CI)	FDR	nsnps	PP.H0.abf	PP.H1.abf	PP.H2.abf	PP.H3.abf	PP.H4.abf	PP.H4.abf_conditional	PP.H4.abf_1	PP.H4.abf_2
renal_carcinoma	ENSG00000008710	16	PKD1	2162305	rs13333747	16	2175373	C	T	0.182903	0.195488	0.0493793	7.53e-05	-0.136142	0.0146201	1.2545e-20	-1.43591	0.394121	0.000269145	0.836321	20	-2.20839	-0.663433	0.237899	0.109878	0.51508	0.238(0.11,0.515)	0.159209	1967	3.13131e-16	0.0243298	4.12723e-16	0.0311234	0.944547	0.9681	0.97567	30.3484
renal_carcinoma	ENSG00000115718	2	PROC	128181412	rs971207	2	128181518	T	C	0.321074	-0.135341	0.0375663	0.000314901	-0.175659	0.00850087	7.36614e-95	0.770478	0.217086	0.000386429	0.121634	20	0.344989	1.19597	2.1608	1.41198	3.30675	2.161(1.412,3.307)	0.159209	2149	2.35003e-89	0.0719142	8.87078e-89	0.270801	0.657285	0.708216	0.928086	2.42719
renal_carcinoma	ENSG00000196365	19	LONP1	5706214	rs8102642	19	5669970	G	C	0.349901	-0.122747	0.0381531	0.00129442	-0.388713	0.0080642	0	0.315777	0.0983708	0.00132702	0.102637	20	0.12297	0.508584	1.37132	1.13085	1.66293	1.371(1.131,1.663)	0.364488	2367	0	0.340424	0	0.191939	0.467636	0.708996	0.659576	2.43638
renal_carcinoma	ENSG00000211456	3	SACM1L	45758732	rs2742433	3	45738107	T	C	0.38171	0.107968	0.0362884	0.00292712	0.408946	0.008186	0	0.264017	0.0888937	0.00297773	0.0514111	20	0.0897853	0.438249	1.30215	1.09394	1.54999	1.302(1.094,1.55)	0.603891	2296	0	0.339657	0	0.217534	0.442808	0.670574	0.660343	2.03558
renal_carcinoma	ENSG00000160789	1	LMNA	156081122	rs609625	1	156089631	G	C	0.0656064	-0.214543	0.0735929	0.00355385	0.67149	0.0187115	4.97906e-282	-0.319503	0.109957	0.00366439	0.557995	20	-0.535019	-0.103987	0.72651	0.585658	0.901237	0.727(0.586,0.901)	0.603891	1323	7.27155e-272	0.38399	1.09375e-272	0.0571992	0.558811	0.907146	0.61601	9.76955
renal_carcinoma	ENSG00000166710	15	B2M	45007375	rs3110175	15	45041201	T	C	0.0407555	0.250507	0.0865872	0.00381434	-0.190412	0.0184593	6.0156e-25	-1.31561	0.472284	0.00534238	0.0224933	15	-2.24129	-0.389933	0.268311	0.106322	0.677102	0.268(0.106,0.677)	0.724352	528	0.951408	0.00817826	0.0373569	0.00031838	0.00273862	0.895852	0.003057	8.60175
renal_carcinoma	ENSG00000104324	8	CPQ	97909668	rs2704248	8	97657415	C	G	0.0596421	-0.181207	0.0658807	0.0059498	-0.547146	0.0178817	1.29332e-205	0.331186	0.120893	0.00615348	0.391238	20	0.0942357	0.568136	1.39262	1.09882	1.76497	1.393(1.099,1.765)	0.724352	1464	4.31405e-197	0.483365	5.20106e-198	0.057816	0.458819	0.888091	0.516635	7.93585
renal_carcinoma	ENSG00000148346	9	LCN2	130913542	rs13297866	9	131510406	T	C	0.149105	-0.159432	0.05838	0.00631542	0.268499	0.0205646	5.84262e-39	-0.59379	0.222136	0.00751558	0.8717	20	-1.02918	-0.158403	0.55223	0.357301	0.853505	0.552(0.357,0.854)	0.774105	1216	0.92777	0.0146926	0.0557164	0.000881412	0.000939118	0.515848	0.00182053	1.06547
renal_carcinoma	ENSG00000104219	8	ZDHHC2	17047923	rs3808645	8	17013199	C	T	0.185885	0.120422	0.0462719	0.00925507	0.454681	0.0106353	0	0.264849	0.101956	0.00938567	0.122723	20	0.0650152	0.464683	1.30323	1.06718	1.59151	1.303(1.067,1.592)	0.844547	3555	0	0.558524	0	0.128143	0.313333	0.709739	0.441476	2.44518
renal_carcinoma	ENSG00000187097	14	ENTPD5	74455407	rs118113209	14	74432158	A	G	0.0775348	0.178197	0.0688123	0.0096085	-0.311238	0.0171753	2.16807e-73	-0.572543	0.223339	0.0103603	0.602016	20	-1.01029	-0.134799	0.564089	0.364114	0.873892	0.564(0.364,0.874)	0.844547	1992	7.26482e-65	0.644919	1.20017e-65	0.106294	0.248787	0.700649	0.355081	2.34056
renal_carcinoma	ENSG00000140386	15	SCAPER	76919155	rs3765115	15	76673716	C	T	0.331014	-0.0930388	0.0367897	0.0114409	0.649151	0.00765251	0	-0.143324	0.0566988	0.0114776	0.587928	20	-0.254454	-0.0321944	0.866473	0.77534	0.968318	0.866(0.775,0.968)	0.844547	1581	0	0.64861	0	0.0927074	0.258683	0.73617	0.35139	2.79032
renal_carcinoma	ENSG00000100211	22	CBY1	39061250	rs3946137	22	38988115	G	A	0.34493	0.10163	0.0396308	0.0103349	-0.066191	0.00831837	1.7598e-15	-1.53541	0.62906	0.014655	0.0846609	20	-2.76837	-0.302452	0.215367	0.0627644	0.739004	0.215(0.063,0.739)	0.844547	1765	4.44308e-12	0.239429	2.21821e-12	0.118893	0.641678	0.843679	0.760571	5.39709
renal_carcinoma	ENSG00000068912	2	ERLEC1	54030068	rs805311	2	54149245	C	T	0.252485	-0.098775	0.0392961	0.0119502	0.0835556	0.00944644	9.13648e-19	-1.18215	0.48892	0.0156114	0.411395	20	-2.14043	-0.223867	0.306619	0.117604	0.799422	0.307(0.118,0.799)	0.844547	2140	3.25268e-13	0.504725	2.26881e-13	0.351912	0.143364	0.289463	0.495275	0.407385
renal_carcinoma	ENSG00000127191	9	TRAF2	139798711	rs10781522	9	139815053	G	A	0.371769	0.089344	0.036776	0.0151235	0.165189	0.00831933	9.77989e-88	0.540861	0.224291	0.0158903	0.782446	20	0.101251	0.980471	1.71748	1.10655	2.66571	1.717(1.107,2.666)	0.844547	1529	2.58954e-15	0.878407	3.10531e-16	0.10532	0.0162725	0.133828	0.121593	0.154505
renal_carcinoma	ENSG00000128973	15	CLN6	68524439	rs2169215	15	68538856	G	A	0.441352	-0.0878364	0.0367322	0.0167905	-0.593786	0.00724469	0	0.147926	0.0618873	0.0168371	0.744863	20	0.0266269	0.269225	1.15943	1.02698	1.30895	1.159(1.027,1.309)	0.844547	1269	0.0010603	0.917704	6.37088e-05	0.0551145	0.026058	0.32102	0.0811724	0.472797
renal_carcinoma	ENSG00000134970	5	TMED7	114958947	rs400570	5	114951553	A	G	0.44831	0.0847974	0.0347655	0.0147229	0.0759197	0.00798684	1.989e-21	1.11694	0.47276	0.018148	0.18373	20	0.19033	2.04355	3.05549	1.20965	7.71796	3.055(1.21,7.718)	0.844547	2291	1.01569e-15	0.696871	1.46757e-16	0.100488	0.202641	0.668497	0.303129	2.01656
renal_carcinoma	ENSG00000165650	10	PDZD8	119087489	rs1638670	10	119154977	G	A	0.277336	-0.09041	0.0384214	0.0186169	0.571085	0.00787698	0	-0.158313	0.0673133	0.018679	0.301837	20	-0.290247	-0.0263789	0.853583	0.748079	0.973966	0.854(0.748,0.974)	0.844547	1566	3.81264e-252	0.567015	2.55307e-252	0.379639	0.0533461	0.123205	0.432985	0.140518
renal_carcinoma	ENSG00000089157	12	RPLP0	120636763	rs2074540	12	120636549	A	C	0.153082	-0.119009	0.0489883	0.0151269	0.0943275	0.0113944	1.24841e-16	-1.26165	0.541243	0.0197517	0.51853	20	-2.32249	-0.200814	0.283186	0.0980296	0.818065	0.283(0.098,0.818)	0.844547	1936	0.886837	0.0365459	0.0720973	0.00296953	0.0015507	0.343057	0.00452022	0.522203
renal_carcinoma	ENSG00000131148	16	EMC8	85819289	rs111840436	16	85803059	C	G	0.0775348	-0.151947	0.0651019	0.0195967	-0.409408	0.0159108	5.20686e-146	0.371138	0.159668	0.020102	0.382355	16	0.0581887	0.684087	1.44938	1.05992	1.98196	1.449(1.06,1.982)	0.844547	3390	3.09443e-138	0.619032	7.9011e-139	0.157836	0.223132	0.585697	0.380968	1.41369
	ENSG00000101310	20	SEC23B	18515098	rs3748450	20	18470664	A	G	0.126243	-0.119	0.0516819	0.0213045	-0.495643	0.0113507	0	0.240091	0.104417	0.0214851	0.00678651	20	0.0354337	0.444748	1.27136	1.03607	1.5601	1.271(1.036,1.56)	0.844547
renal_carcinoma	ENSG00000096384	6	HSP90AB1	44218222	rs575034	6	44224924	C	A	0.537773	-0.0961098	0.0381864	0.0118405	-0.0451942	0.00817344	3.2133e-08	2.1266	0.928352	0.0219796	0.377512	17	0.30703	3.94617	8.3863	1.35938	51.7368	8.386(1.359,51.737)	0.844547	1651	0.0132088	0.767739	0.00138611	0.0804282	0.137237	0.630496	0.217666	1.70633
renal_carcinoma	ENSG00000089159	12	PXN	120675912	rs2238155	12	120667194	C	A	0.156064	-0.115084	0.0497445	0.0206947	-0.125815	0.0161924	7.84856e-15	0.914711	0.412532	0.0266021	0.615896	20	0.106148	1.72327	2.49605	1.11199	5.60284	2.496(1.112,5.603)	0.844547	2049	0.855237	0.063808	0.0727034	0.00542146	0.00282999	0.342969	0.00825146	0.521998
renal_carcinoma	ENSG00000175197	12	DDIT3	57912335	rs697221	12	57911160	A	G	0.17495	-0.111056	0.0496574	0.0253232	0.19095	0.0117857	4.89716e-59	-0.581594	0.26252	0.0267306	0.934148	20	-1.09613	-0.0670548	0.559007	0.334161	0.935144	0.559(0.334,0.935)	0.844547	1140	1.45044e-52	0.751566	9.74728e-54	0.0503087	0.198126	0.797497	0.248434	3.9382
renal_carcinoma	ENSG00000164307	5	ERAP1	96120162	rs2013671	5	96134283	C	T	0.224652	-0.0934837	0.0421417	0.0265331	0.313228	0.0105434	5.96385e-194	-0.298453	0.134914	0.0269555	0.0105784	20	-0.562884	-0.0340216	0.741965	0.569564	0.966551	0.742(0.57,0.967)	0.844547	2590	1.89848e-186	0.705621	3.79585e-187	0.14093	0.153449	0.521263	0.294379	1.08883
renal_carcinoma	ENSG00000125991	20	ERGIC3	34137587	rs224427	20	34150145	G	A	0.235586	-0.0919672	0.0411378	0.0253789	-0.124014	0.00929265	1.25991e-40	0.741586	0.336341	0.0274636	0.784896	20	0.0823576	1.40081	2.09926	1.08584	4.0585	2.099(1.086,4.059)	0.844547	1543	2.70933e-34	0.76147	2.35154e-35	0.0659186	0.172612	0.723647	0.23853	2.61856
renal_carcinoma	ENSG00000183873	3	SCN5A	38640356	rs11720524	3	38675412	G	C	0.405567	0.0813767	0.0364662	0.0256439	-0.0892647	0.00913661	1.51449e-22	-0.911633	0.419039	0.0295901	0.194551	20	-1.73295	-0.0903166	0.401867	0.176762	0.913642	0.402(0.177,0.914)	0.844547	1902	2.68237e-16	0.679555	7.29807e-17	0.184754	0.135691	0.423445	0.320445	0.734439
renal_carcinoma	ENSG00000085662	7	AKR1B1	134135569	rs73164856	7	134233851	T	C	0.392644	0.0796766	0.0366886	0.0298784	0.28106	0.00836027	8.97307e-248	0.283486	0.130808	0.030221	0.411598	20	0.0271023	0.53987	1.32775	1.02747	1.71578	1.328(1.027,1.716)	0.844547	990	0.849443	0.0472587	0.0946978	0.00526517	0.00333546	0.387816	0.00860063	0.633496
renal_carcinoma	ENSG00000134308	2	YWHAQ	9747622	rs10929608	2	9879275	C	A	0.298211	-0.0967421	0.0446053	0.0300943	0.276834	0.0140633	2.91082e-86	-0.349459	0.162102	0.0310992	0.889744	20	-0.667179	-0.0317391	0.705069	0.513154	0.968759	0.705(0.513,0.969)	0.844547	2459	6.77691e-81	0.767493	8.81382e-82	0.0996847	0.132822	0.571261	0.232507	1.33242
renal_carcinoma	ENSG00000134153	15	EMC7	34385183	rs8028703	15	34378095	C	T	0.110338	0.118826	0.0542096	0.028382	0.133473	0.0142089	5.79841e-21	0.890259	0.417057	0.0327921	0.840166	20	0.0728273	1.70769	2.43576	1.07554	5.51621	2.436(1.076,5.516)	0.844547	2159	0.585239	0.141597	0.210465	0.0509096	0.0117898	0.188037	0.0626994	0.231583
renal_carcinoma	ENSG00000152700	5	SAR1B	133960897	rs246344	5	134043468	G	A	0.189861	0.0978576	0.0457515	0.0324443	-0.208447	0.0102278	2.4961e-92	-0.46946	0.220693	0.0334026	0.729216	20	-0.902018	-0.0369017	0.62534	0.40575	0.963771	0.625(0.406,0.964)	0.844547	1183	1.86659e-85	0.775807	1.69088e-86	0.0701236	0.15407	0.687218	0.224193	2.19711
renal_carcinoma	ENSG00000105327	19	BBC3	47730052	rs35368210	19	47699707	G	A	0.485089	-0.0821036	0.0368565	0.0259035	0.0554615	0.00813862	9.45261e-12	-1.48037	0.699147	0.0342264	0.670235	20	-2.8507	-0.110042	0.227553	0.057804	0.895797	0.228(0.058,0.896)	0.844547	1724	0.587795	0.0360454	0.34074	0.0208807	0.0145383	0.410466	0.035419	0.696255
renal_carcinoma	ENSG00000198793	1	MTOR	11244578	rs4845986	1	11288633	G	C	0.276342	0.0806151	0.0380811	0.0342658	0.242248	0.00880545	1.29323e-166	0.33278	0.157664	0.0347989	0.954189	20	0.0237586	0.641801	1.39484	1.02404	1.8999	1.395(1.024,1.9)	0.844547	1439	9.26744e-160	0.792043	9.20134e-161	0.0785099	0.129448	0.622471	0.207957	1.6488
renal_carcinoma	ENSG00000143801	1	PSEN2	227070845	rs3795445	1	227180947	A	C	0.506958	-0.0725321	0.0341713	0.0337872	-0.141729	0.00792622	1.6584e-71	0.511767	0.242796	0.035048	0.527364	20	0.0358868	0.987647	1.66824	1.03654	2.68491	1.668(1.037,2.685)	0.844547	1513	5.41334e-33	0.726211	1.59343e-33	0.213702	0.0600863	0.219463	0.273789	0.281169
renal_carcinoma	ENSG00000244038	1	DDOST	20983135	rs3131713	1	20972048	G	A	0.104374	-0.115652	0.0548275	0.0349121	-0.302626	0.0119653	3.91172e-141	0.382161	0.181802	0.0355464	0.0157023	20	0.0258291	0.738493	1.46545	1.02617	2.09278	1.465(1.026,2.093)	0.844547	1888	3.53379e-134	0.69999	7.44043e-135	0.147231	0.152779	0.509247	0.30001	1.03769
renal_carcinoma	ENSG00000198218	3	QRICH1	49099468	rs9311431	3	48848787	T	A	0.2167	0.0844284	0.0402724	0.0360437	0.266743	0.00917378	7.076e-186	0.316516	0.15137	0.0365275	0.204127	20	0.0198308	0.613201	1.37234	1.02003	1.84633	1.372(1.02,1.846)	0.844547	735	1.4602e-178	0.835929	5.40645e-180	0.0308173	0.133254	0.812171	0.164071	4.32399
renal_carcinoma	ENSG00000113194	5	FAF2	175905852	rs2963672	5	175935316	T	C	0.318091	0.082201	0.0380812	0.0308833	0.0712781	0.00872864	3.1878e-16	1.15324	0.552612	0.0368977	0.0353382	20	0.0701205	2.23636	3.16844	1.07264	9.3592	3.168(1.073,9.359)	0.844547	1229	4.7669e-10	0.772744	5.61677e-11	0.0909151	0.136341	0.599945	0.227256	1.49965
renal_carcinoma	ENSG00000213689	3	TREX1	48507744	rs730566	3	48487048	A	C	0.246521	0.0788627	0.0382025	0.0389862	0.349647	0.0126658	9.50491e-168	0.22555	0.109565	0.039534	0.116849	20	0.0108026	0.440297	1.25301	1.01086	1.55317	1.253(1.011,1.553)	0.868261	727	1.62326e-160	0.84703	5.88386e-162	0.03058	0.12239	0.800091	0.15297	4.00228
renal_carcinoma	ENSG00000109689	4	STIM2	26943151	rs56775163	4	27035891	A	G	0.232604	-0.0862167	0.0419025	0.0396331	0.290241	0.00905803	2.8014e-225	-0.297052	0.144669	0.0400411	0.0619548	20	-0.580603	-0.0135008	0.743005	0.559561	0.98659	0.743(0.56,0.987)	0.868261	1626	4.55696e-218	0.788251	5.01172e-219	0.0865664	0.125183	0.591185	0.211749	1.44609
renal_carcinoma	ENSG00000149273	11	RPS3	75121927	rs3133186	11	75109868	C	T	0.0656064	-0.14748	0.0706385	0.0368152	-0.14268	0.0173243	1.7836e-16	1.03364	0.510745	0.0429916	0.0997506	4	0.0325798	2.0347	2.81128	1.03312	7.64996	2.811(1.033,7.65)	0.898879	1561	4.67495e-11	0.762524	4.30515e-12	0.0700531	0.167423	0.705009	0.237476	2.38994
renal_carcinoma	ENSG00000138061	2	CYP1B1	38315580	rs112158333	2	38365607	T	C	0.130219	-0.0974842	0.0482516	0.0433494	0.423998	0.0109547	0	-0.229917	0.113957	0.0436349	0.683344	20	-0.453273	-0.00656128	0.7946	0.635545	0.99346	0.795(0.636,0.993)	0.898879	2682	0	0.647584	0	0.245022	0.107394	0.304737	0.352416	0.438306
renal_carcinoma	ENSG00000178719	8	GRINA	145065904	rs57957974	8	145076529	A	C	0.369781	0.0724644	0.036684	0.0482266	-0.491646	0.0116386	0	-0.147391	0.0746962	0.0484717	0.251793	20	-0.293796	-0.000986448	0.862956	0.745429	0.999014	0.863(0.745,0.999)	0.920797	1516	0	0.807661	0	0.0968302	0.0955087	0.496565	0.192339	0.986352
renal_carcinoma	ENSG00000150991	12	UBC	125399032	rs10846757	12	125328933	A	G	0.470179	0.0784663	0.0371335	0.0345935	-0.0446824	0.00814748	4.1534e-08	-1.75609	0.890609	0.0486343	0.0744848	13	-3.50168	-0.0104964	0.172719	0.0301466	0.989559	0.173(0.03,0.99)	0.920797	2508	0.0169127	0.714115	0.00480117	0.202661	0.0615099	0.232841	0.264171	0.303511
renal_carcinoma	ENSG00000100243	22	CYB5R3	43029710	rs60631826	22	43044572	A	G	0.112326	0.104542	0.0530171	0.0486251	-0.462358	0.011758	0	-0.226107	0.114811	0.0489083	0.515494	20	-0.451137	-0.00107744	0.797633	0.636904	0.998923	0.798(0.637,0.999)	0.920797	1693	4.97926e-13	0.872937	3.90527e-14	0.0684065	0.058656	0.461631	0.127063	0.857463
	ENSG00000137154	9	RPS6	19377982	rs35567310	9	19378204	T	C	0.0954274	-0.11966	0.0590465	0.0427103	-0.18511	0.0256948	5.83859e-13	0.646424	0.33136	0.0510787	0.159499	20	-0.0030416	1.29589	1.9087	0.996963	3.65425	1.909(0.997,3.654)	0.920797
	ENSG00000126602	16	TRAP1	3734619	rs4786429	16	3728517	C	T	0.284294	0.0738603	0.0379471	0.0516063	-0.587983	0.0125114	0	-0.125616	0.0645929	0.0518067	0.914578	20	-0.252218	0.000986084	0.881953	0.777075	1.00099	0.882(0.777,1.001)	0.920797
	ENSG00000149257	11	SERPINH1	75278464	rs694844	11	75295368	A	T	0.470179	0.0692691	0.0357304	0.0525429	-0.25827	0.00788946	4.78832e-235	-0.268204	0.138588	0.0529574	0.193529	20	-0.539836	0.00342848	0.764752	0.582844	1.00343	0.765(0.583,1.003)	0.920797
	ENSG00000169032	15	MAP2K1	66731902	rs11637949	15	66628874	G	A	0.240557	0.0798957	0.0409834	0.05124	-0.203235	0.0136824	6.57333e-50	-0.39312	0.203384	0.0532499	0.556449	20	-0.791753	0.00551264	0.674948	0.45305	1.00553	0.675(0.453,1.006)	0.920797
	ENSG00000129103	7	SUMF2	56140029	rs12155441	7	56074118	T	C	0.206759	-0.0785428	0.0407465	0.053905	0.311661	0.00901947	1.22845e-261	-0.252013	0.130943	0.0542786	0.181555	20	-0.508661	0.00463528	0.777235	0.6013	1.00465	0.777(0.601,1.005)	0.920797
	ENSG00000156508	6	EEF1A1	74229496	rs3822960	6	74230859	C	T	0.306163	-0.0706143	0.0368537	0.0553563	0.533512	0.00969572	0	-0.132357	0.0691195	0.0555042	0.59493	20	-0.267831	0.00311722	0.876028	0.765037	1.00312	0.876(0.765,1.003)	0.920797
	ENSG00000134184	1	GSTM1	110240871	rs12045101	1	110267651	T	C	0.230616	0.0786381	0.0411063	0.0557427	0.58619	0.010018	0	0.134151	0.0701619	0.0558736	0.495118	20	-0.00336632	0.271668	1.14357	0.996639	1.31215	1.144(0.997,1.312)	0.920797
	ENSG00000104356	8	POP1	99150793	rs116783271	8	99186574	A	G	0.0864811	-0.141655	0.0722348	0.0498746	0.105622	0.0159377	3.4211e-11	-1.34115	0.713209	0.0600484	0.119428	7	-2.73904	0.0567396	0.261545	0.0646324	1.05838	0.262(0.065,1.058)	0.922822
	ENSG00000168216	6	LMBRD1	70446348	rs9360401	6	70463955	G	T	0.432406	0.0706056	0.0368209	0.0551691	0.185944	0.0203093	5.40569e-20	0.379715	0.202318	0.0605426	0.266658	20	-0.0168283	0.776258	1.46187	0.983313	2.17333	1.462(0.983,2.173)	0.922822
	ENSG00000198836	3	OPA1	193363272	rs10419	3	193415262	T	A	0.0934394	0.108951	0.0581168	0.0608357	0.361204	0.0147347	1.0527e-132	0.301632	0.161367	0.0615909	0.0766856	20	-0.0146473	0.617911	1.35206	0.985459	1.85505	1.352(0.985,1.855)	0.922822
	ENSG00000104419	8	NDRG1	134281839	rs2977503	8	134284839	C	T	0.289264	-0.0724234	0.0392343	0.0649035	-0.316972	0.00897716	4.31813e-273	0.228485	0.123947	0.0652699	0.677281	20	-0.0144511	0.471421	1.25669	0.985653	1.60227	1.257(0.986,1.602)	0.922822
	ENSG00000124164	20	VAPB	56995167	rs6026274	20	57011934	T	G	0.39165	0.0646358	0.034976	0.0646018	0.140186	0.00796286	2.25508e-69	0.461071	0.250868	0.0660763	0.037571	20	-0.0306303	0.952772	1.58577	0.969834	2.59289	1.586(0.97,2.593)	0.922822
	ENSG00000135636	2	DYSF	71797375	rs4852258	2	71678532	T	C	0.129225	-0.101252	0.0551287	0.066261	0.314898	0.0122718	3.25344e-145	-0.321541	0.175517	0.0669563	0.052987	20	-0.665554	0.0224723	0.725031	0.513989	1.02273	0.725(0.514,1.023)	0.922822
	ENSG00000093010	22	COMT	19943314	rs9618717	22	19921978	G	A	0.483101	-0.0637257	0.0349981	0.0686324	0.275823	0.00785518	4.19474e-270	-0.231039	0.127057	0.0690047	0.655494	20	-0.480071	0.0179927	0.793709	0.61874	1.01816	0.794(0.619,1.018)	0.922822
	ENSG00000149084	11	HSD17B12	43728076	rs1061810	11	43877934	A	C	0.303181	0.0702481	0.0389318	0.0711703	-0.716516	0.0084998	0	-0.0980412	0.0543473	0.0712351	0.072714	20	-0.204562	0.00847951	0.906612	0.815004	1.00852	0.907(0.815,1.009)	0.922822
	ENSG00000157184	1	CPT2	53670985	rs11581518	1	53672028	G	A	0.206759	0.0772194	0.0430278	0.0727112	-0.26226	0.00994454	2.84876e-153	-0.294438	0.164445	0.0733738	0.713287	20	-0.61675	0.0278742	0.74495	0.539695	1.02827	0.745(0.54,1.028)	0.922822
	ENSG00000091831	6	ESR1	152214290	rs3020333	6	152010254	G	A	0.469185	0.0625797	0.0348894	0.0728673	-0.123822	0.00866495	2.52611e-46	-0.5054	0.283981	0.0751257	0.0239208	20	-1.062	0.0512028	0.603264	0.345763	1.05254	0.603(0.346,1.053)	0.922822
	ENSG00000071051	2	NCK2	106436042	rs6726571	2	106390251	C	T	0.45825	-0.0632683	0.0355249	0.0749195	0.158278	0.00804715	3.9912e-86	-0.39973	0.225365	0.0761127	0.627124	20	-0.841445	0.0419854	0.670501	0.431087	1.04288	0.671(0.431,1.043)	0.922822
	ENSG00000121858	3	TNFSF10	172232297	rs3181140	3	172227642	A	G	0.309145	-0.0658715	0.0375937	0.0797406	0.184241	0.00847975	1.13516e-104	-0.357528	0.204709	0.0807201	0.92072	20	-0.758758	0.0437016	0.699403	0.468248	1.04467	0.699(0.468,1.045)	0.922822
	ENSG00000164181	5	ELOVL7	60093917	rs10062839	5	60103452	C	T	0.187873	0.0739138	0.0422719	0.0803717	-0.265613	0.0103871	3.17478e-144	-0.278276	0.15952	0.0810789	0.171174	20	-0.590935	0.0343832	0.757088	0.553809	1.03498	0.757(0.554,1.035)	0.922822
	ENSG00000139055	12	ERP27	15079492	rs2445388	12	15066878	T	G	0.39165	-0.0627075	0.035973	0.0813015	-0.578863	0.00752282	0	0.108329	0.0621602	0.0813796	0.833255	20	-0.013505	0.230163	1.11441	0.986586	1.25881	1.114(0.987,1.259)	0.922822
	ENSG00000178467	3	P4HTM	49035953	rs13064911	3	48952385	A	G	0.33499	0.0637799	0.0367161	0.0823677	-0.32448	0.0094747	4.83418e-257	-0.19656	0.113299	0.082762	0.733764	20	-0.418626	0.025506	0.821552	0.65795	1.02583	0.822(0.658,1.026)	0.922822
	ENSG00000117682	1	DHDDS	26778279	rs3816539	1	26786627	A	G	0.234592	0.0737608	0.042832	0.0850521	-0.132878	0.00952534	3.14607e-44	-0.5551	0.324786	0.0874283	0.804014	20	-1.19168	0.0814806	0.574015	0.30371	1.08489	0.574(0.304,1.085)	0.922822
	ENSG00000143384	1	MCL1	150549549	rs4970966	1	150584103	T	G	0.241551	0.0712447	0.0417466	0.0878971	-0.220546	0.00971457	4.22282e-114	-0.323038	0.189822	0.0887938	0.554377	20	-0.695089	0.0490131	0.723946	0.49903	1.05023	0.724(0.499,1.05)	0.922822
	ENSG00000165672	10	PRDX3	120932780	rs7068937	10	120926432	C	T	0.441352	0.0603735	0.0354931	0.0889445	0.225896	0.0117336	1.3582e-82	0.267263	0.157734	0.0901909	0.304782	20	-0.0418956	0.576422	1.30638	0.95897	1.77966	1.306(0.959,1.78)	0.922822
	ENSG00000197249	14	SERPINA1	94850057	rs8008743	14	94857010	C	G	0.501988	-0.0596509	0.0354785	0.0926994	-0.452091	0.00756954	0	0.131945	0.0785075	0.0928287	0.145488	20	-0.0219297	0.28582	1.14105	0.978309	1.33085	1.141(0.978,1.331)	0.922822
	ENSG00000126432	11	PRDX5	64087421	rs1047206	11	64089216	G	C	0.161034	-0.0832368	0.0496158	0.09342	0.841784	0.0101932	0	-0.0988814	0.0589534	0.0934876	0.347365	20	-0.21443	0.0166673	0.90585	0.807001	1.01681	0.906(0.807,1.017)	0.922822
	ENSG00000136869	9	TLR4	120472879	rs2770150	9	120463139	G	A	0.250497	0.0632336	0.0381576	0.0974855	-0.607764	0.00833668	0	-0.104043	0.0627998	0.097572	0.231875	20	-0.227131	0.0190446	0.901187	0.796817	1.01923	0.901(0.797,1.019)	0.922822
	ENSG00000014123	6	UFL1	96986311	rs9386528	6	96928514	A	G	0.336978	-0.0610716	0.0369214	0.0981075	0.181265	0.00944544	4.41789e-82	-0.336918	0.204442	0.0993551	0.687549	20	-0.737624	0.0637883	0.713967	0.478249	1.06587	0.714(0.478,1.066)	0.922822
	ENSG00000100219	22	XBP1	29193564	rs12165489	22	29090768	C	A	0.112326	0.0836323	0.050775	0.0995346	0.572626	0.0113456	0	0.14605	0.0887176	0.0997148	0.328494	20	-0.0278365	0.319936	1.15725	0.972547	1.37704	1.157(0.973,1.377)	0.922822
	ENSG00000167476	19	JSRP1	2261005	rs2523167	19	2266434	G	A	0.316103	-0.0656314	0.0394724	0.096369	0.122703	0.0123275	2.4322e-23	-0.534881	0.326148	0.101007	0.0624469	20	-1.17413	0.104369	0.585739	0.309087	1.11001	0.586(0.309,1.11)	0.922822
	ENSG00000141510	17	TP53	7577976	rs17879377	17	7574721	T	C	0.0506958	0.13124	0.0788718	0.0961199	-0.134617	0.0181385	1.1571e-13	-0.974911	0.600443	0.10445	0.250884	18	-2.15178	0.201957	0.377226	0.116277	1.2238	0.377(0.116,1.224)	0.922822
	ENSG00000108691	17	CCL2	32583229	rs112571888	17	32520058	C	G	0.0705765	-0.123148	0.0735371	0.0940046	0.105558	0.0160232	4.4639e-11	-1.16664	0.718809	0.104584	0.0589447	12	-2.57551	0.242226	0.311412	0.0761153	1.27408	0.311(0.076,1.274)	0.922822
	ENSG00000118432	6	CNR1	88862830	rs1870832	6	89157027	G	A	0.363817	-0.0575667	0.0354673	0.10457	0.328517	0.0080417	0	-0.175232	0.108047	0.104843	0.578235	20	-0.387004	0.0365401	0.839262	0.679088	1.03722	0.839(0.679,1.037)	0.922822
	ENSG00000128829	15	EIF2AK4	40277072	rs11070245	15	40317792	G	T	0.531809	-0.056018	0.0348329	0.107792	-0.20132	0.00786646	1.86319e-144	0.278254	0.173364	0.108487	0.0865542	20	-0.0615394	0.618047	1.32082	0.940316	1.8553	1.321(0.94,1.855)	0.922822
	ENSG00000162711	1	NLRP3	247595934	rs4925547	1	247612435	T	A	0.403579	0.0572041	0.0357184	0.109259	0.270898	0.00799922	2.14627e-251	0.211165	0.131999	0.109655	0.451821	20	-0.047553	0.469883	1.23512	0.95356	1.59981	1.235(0.954,1.6)	0.922822
	ENSG00000109501	4	WFS1	6288284	rs10005000	4	6310222	C	T	0.105368	-0.0829375	0.0518559	0.109736	-0.277939	0.0121435	6.1185e-116	0.298401	0.187028	0.110602	0.788317	20	-0.0681739	0.664976	1.3477	0.934098	1.94444	1.348(0.934,1.944)	0.922822
	ENSG00000136731	2	UGGT1	128901012	rs10194565	2	128897455	G	A	0.152087	0.0758755	0.0467333	0.104464	0.094556	0.0110197	9.43798e-18	0.80244	0.503009	0.11065	0.322137	20	-0.183458	1.78834	2.23098	0.832387	5.9795	2.231(0.832,5.98)	0.922822
	ENSG00000134910	11	STT3A	125478358	rs505232	11	125492296	A	T	0.306163	0.0610701	0.038257	0.11042	-0.307675	0.012746	9.74233e-129	-0.198489	0.124614	0.111198	0.746779	20	-0.442732	0.0457544	0.819969	0.642279	1.04682	0.82(0.642,1.047)	0.922822
	ENSG00000135218	7	CD36	80153742	rs7755	7	80306271	A	G	0.442346	-0.0569887	0.0359161	0.112577	-0.60168	0.00724288	0	0.0947159	0.059704	0.112643	0.900673	20	-0.0223039	0.211736	1.09935	0.977943	1.23582	1.099(0.978,1.236)	0.922822
	ENSG00000164615	5	CAMLG	134081019	rs60191893	5	134080856	A	G	0.133201	-0.0926556	0.0585048	0.113256	0.74662	0.0131486	0	-0.1241	0.0783901	0.113396	0.169537	20	-0.277745	0.0295446	0.883292	0.75749	1.02999	0.883(0.757,1.03)	0.922822
	ENSG00000198959	20	TGM2	36775921	rs12624511	20	36769839	A	G	0.139165	0.0788887	0.0494008	0.110286	-0.128313	0.0117911	1.40139e-27	-0.614815	0.389126	0.11411	0.165407	20	-1.3775	0.147872	0.540741	0.252208	1.15936	0.541(0.252,1.159)	0.922822
	ENSG00000168394	6	TAP1	32817370	rs2071477	6	32825348	C	T	0.398608	-0.0553859	0.0346148	0.109585	0.117048	0.0122774	1.51919e-21	-0.473189	0.299868	0.114568	0.307017	20	-1.06093	0.114552	0.623012	0.346134	1.12137	0.623(0.346,1.121)	0.922822
	ENSG00000100097	22	LGALS1	38073714	rs62236671	22	38069305	A	G	0.338966	0.0577899	0.0365862	0.114209	-0.297678	0.00893676	2.82246e-243	-0.194135	0.123043	0.114616	0.242599	20	-0.435299	0.0470293	0.823547	0.647071	1.04815	0.824(0.647,1.048)	0.922822
	ENSG00000179630	13	LACC1	44460744	rs9533632	13	44396431	G	C	0.190855	-0.076561	0.0479127	0.110059	-0.0886675	0.0115842	1.94519e-14	0.863461	0.552013	0.11777	0.488587	11	-0.218484	1.94541	2.37135	0.803736	6.99648	2.371(0.804,6.996)	0.922822
	ENSG00000080815	14	PSEN1	73646762	rs214267	14	73647174	C	G	0.156064	-0.0724959	0.0463107	0.117484	-0.359618	0.010446	1.01571e-259	0.201591	0.12891	0.117863	0.320428	20	-0.0510726	0.454255	1.22335	0.95021	1.575	1.223(0.95,1.575)	0.922822
	ENSG00000110958	12	PTGES3	57069643	rs11835120	12	57049774	A	G	0.33996	0.0596614	0.0377951	0.114439	0.0963568	0.00936885	8.25131e-25	0.619172	0.396834	0.118694	0.322952	20	-0.158623	1.39697	1.85739	0.853318	4.04292	1.857(0.853,4.043)	0.922822
	ENSG00000096717	10	SIRT1	69661287	rs10997832	10	69607395	C	G	0.331014	-0.0584879	0.0377498	0.121296	0.712669	0.0121184	0	-0.0820688	0.0529879	0.121425	0.819172	20	-0.185925	0.0217875	0.921209	0.830336	1.02203	0.921(0.83,1.022)	0.922822
	ENSG00000198380	2	GFPT1	69580643	rs6720415	2	69614161	A	G	0.402584	-0.0547468	0.0353381	0.121326	0.47932	0.00768203	0	-0.114218	0.0737481	0.121441	0.23617	20	-0.258764	0.0303283	0.892063	0.772005	1.03079	0.892(0.772,1.031)	0.922822
	ENSG00000129083	11	COPB1	14493279	rs2575859	11	14510736	C	T	0.349901	0.0557175	0.0360197	0.121896	-0.506264	0.00775312	0	-0.110056	0.071168	0.122001	0.517146	20	-0.249545	0.0294333	0.895784	0.779155	1.02987	0.896(0.779,1.03)	0.922822
	ENSG00000148248	9	SURF4	136235647	rs9411464	9	136109165	T	C	0.0715706	-0.0921806	0.0579505	0.111682	0.159449	0.0247032	1.0851e-10	-0.57812	0.374316	0.122475	0.308562	20	-1.31178	0.155539	0.560952	0.26934	1.16829	0.561(0.269,1.168)	0.922822
	ENSG00000078142	18	PIK3C3	39601482	rs12961563	18	39530811	A	G	0.133201	-0.0797603	0.051589	0.122088	-0.453681	0.0170438	4.14617e-156	0.175807	0.113904	0.122717	0.744931	20	-0.0474448	0.399059	1.19221	0.953663	1.49042	1.192(0.954,1.49)	0.922822
	ENSG00000139618	13	BRCA2	32931708	rs1799943	13	32890572	A	G	0.215706	-0.0625409	0.0405694	0.123176	-0.124205	0.00927694	7.04972e-41	0.503529	0.32879	0.125656	0.858118	20	-0.140899	1.14796	1.65455	0.868577	3.15175	1.655(0.869,3.152)	0.922822
	ENSG00000197563	18	PIGN	59782575	rs10439025	18	59852732	T	A	0.367793	0.0542376	0.0354885	0.126435	0.646814	0.00768515	0	0.0838533	0.0548756	0.126497	0.52178	20	-0.0237029	0.191409	1.08747	0.976576	1.21096	1.087(0.977,1.211)	0.922822
	ENSG00000113580	5	NR3C1	142736286	rs4912908	5	142791133	G	A	0.234592	0.0683589	0.0437971	0.118569	0.0728593	0.00980424	1.0745e-13	0.938232	0.614235	0.126641	0.301497	20	-0.265669	2.14213	2.55546	0.766693	8.51758	2.555(0.767,8.518)	0.922822
	ENSG00000023041	10	ZDHHC6	114198365	rs1887139	10	114120439	G	T	0.328032	-0.0566015	0.0370012	0.126086	-0.161755	0.00845948	1.68191e-81	0.349921	0.229479	0.127297	0.0267137	20	-0.0998578	0.7997	1.41896	0.904966	2.22487	1.419(0.905,2.225)	0.922822
	ENSG00000133318	11	RTN3	63488140	rs566255	11	63512565	T	C	0.191849	0.0662308	0.0433807	0.126827	0.220409	0.00983826	3.66292e-111	0.300491	0.197276	0.127709	0.359658	20	-0.08617	0.687152	1.35052	0.917438	1.98805	1.351(0.917,1.988)	0.922822
	ENSG00000138798	4	EGF	110883731	rs2298979	4	110838126	A	G	0.392644	-0.0546255	0.0358294	0.127359	0.163421	0.00804135	8.11619e-92	-0.334262	0.219862	0.128429	0.268005	20	-0.765192	0.0966675	0.715866	0.465245	1.10149	0.716(0.465,1.101)	0.922822
	ENSG00000003402	2	CFLAR	202004930	rs58679595	2	202031698	A	G	0.50994	0.05448	0.0358157	0.12823	0.350289	0.00926004	0	0.155529	0.102329	0.128538	0.272855	20	-0.0450358	0.356094	1.16828	0.955963	1.42774	1.168(0.956,1.428)	0.922822
	ENSG00000111537	12	IFNG	68551037	rs2870960	12	68426628	C	T	0.28827	0.0595478	0.0388441	0.125278	-0.0915546	0.00850848	5.29399e-27	-0.650407	0.428557	0.129098	0.873813	20	-1.49038	0.189565	0.521833	0.225287	1.20872	0.522(0.225,1.209)	0.922822
	ENSG00000084207	11	GSTP1	67352598	rs12789119	11	67262286	A	T	0.395626	-0.0692822	0.0445121	0.119594	-0.063135	0.00953873	3.6213e-11	1.09737	0.724263	0.129735	0.610338	20	-0.322185	2.51693	2.99628	0.724564	12.3904	2.996(0.725,12.39)	0.922822
	ENSG00000102882	16	MAPK3	30130126	rs55732507	16	30141985	C	T	0.437376	0.0554466	0.0367001	0.130838	0.508772	0.00767103	0	0.108981	0.0721533	0.130938	0.179001	20	-0.0324395	0.250401	1.11514	0.968081	1.28454	1.115(0.968,1.285)	0.922822
	ENSG00000163527	3	STT3B	31626621	rs62234683	3	31509006	A	G	0.0765408	-0.0884946	0.0584735	0.130174	-0.274014	0.0133439	1.0525e-93	0.322956	0.213975	0.131217	0.0671371	20	-0.096435	0.742347	1.3812	0.908069	2.10086	1.381(0.908,2.101)	0.922822
	ENSG00000100526	14	CDKN3	54875251	rs2235961	14	54863577	G	A	0.282306	0.058528	0.0386042	0.129493	-0.115918	0.0089429	2.00938e-38	-0.504909	0.335301	0.132109	0.987036	20	-1.1621	0.152281	0.60356	0.312829	1.16449	0.604(0.313,1.164)	0.922822
	ENSG00000096968	9	JAK2	5056608	rs6476941	9	5133609	T	C	0.5	-0.055483	0.0369359	0.13306	0.200572	0.00793997	8.57482e-141	-0.276624	0.184479	0.133746	0.869827	20	-0.638203	0.0849548	0.75834	0.528241	1.08867	0.758(0.528,1.089)	0.922822
	ENSG00000164258	5	NDUFS4	52917815	rs4147744	5	52977580	A	T	0.162028	0.0700997	0.0466739	0.133122	0.21331	0.0160436	2.455e-40	0.328629	0.2202	0.135591	0.659796	20	-0.102963	0.760221	1.38906	0.90216	2.13875	1.389(0.902,2.139)	0.922822
	ENSG00000116237	1	ICMT	6288642	rs14281	1	6281667	C	A	0.0854871	0.111706	0.0747178	0.134903	-0.408396	0.0169938	1.28766e-127	-0.273525	0.183308	0.135657	0.886416	12	-0.632809	0.0857587	0.760693	0.531098	1.08954	0.761(0.531,1.09)	0.922822
	ENSG00000174099	12	MSRB3	65777223	rs6581626	12	65711378	A	G	0.471173	0.0524718	0.0342563	0.125586	-0.0517959	0.00795758	7.5653e-11	-1.01305	0.679437	0.135958	0.738661	20	-2.34475	0.318647	0.36311	0.0958715	1.37527	0.363(0.096,1.375)	0.922822
	ENSG00000051523	16	CYBA	88713625	rs1049254	16	88709828	A	G	0.38668	0.0593679	0.0401624	0.139356	0.364876	0.0140525	1.22478e-148	0.162707	0.11025	0.139996	0.200929	20	-0.053383	0.378797	1.17669	0.948017	1.46053	1.177(0.948,1.461)	0.922822
	ENSG00000186318	11	BACE1	117171688	rs477036	11	117183914	C	T	0.464215	-0.0517304	0.0350057	0.139469	0.208225	0.00791533	1.61161e-152	-0.248435	0.168379	0.140093	0.921995	20	-0.578458	0.0815878	0.780021	0.560762	1.08501	0.78(0.561,1.085)	0.922822
	ENSG00000113734	5	BNIP1	172581417	rs60418095	5	172522096	A	C	0.116302	-0.0764348	0.051958	0.141268	-0.449864	0.0116183	0	0.169906	0.115581	0.141555	0.209634	20	-0.0566328	0.396445	1.18519	0.944941	1.48653	1.185(0.945,1.487)	0.922822
	ENSG00000140319	15	SRP14	40329664	rs16924528	15	40328292	G	A	0.335984	0.0534207	0.0367234	0.145759	0.515153	0.00914965	0	0.103699	0.0713103	0.145893	0.772912	20	-0.0360692	0.243467	1.10927	0.964574	1.27566	1.109(0.965,1.276)	0.922822
	ENSG00000213585	5	VDAC1	133324215	rs4958203	5	133327915	G	A	0.316103	-0.0558346	0.0380897	0.142682	-0.160608	0.014236	1.6141e-29	0.347646	0.239153	0.146042	0.394668	20	-0.121094	0.816386	1.41573	0.885951	2.26231	1.416(0.886,2.262)	0.922822
	ENSG00000142186	11	SCYL1	65299361	rs3782089	11	65336819	T	C	0.0695825	-0.11051	0.0748528	0.139847	-0.127325	0.0163492	6.81863e-15	0.867937	0.59836	0.146912	0.993199	20	-0.304849	2.04072	2.38199	0.737235	7.69617	2.382(0.737,7.696)	0.922822
	ENSG00000162889	1	MAPKAPK2	206882958	rs6669284	1	206890435	A	G	0.316103	-0.0537589	0.03676	0.143624	0.133297	0.012624	4.61548e-26	-0.403302	0.278407	0.147449	0.114377	20	-0.94898	0.142376	0.66811	0.387136	1.15301	0.668(0.387,1.153)	0.922822
	ENSG00000118515	6	SGK1	134564817	rs17827161	6	134557389	G	T	0.0715706	-0.135486	0.0937341	0.148337	0.631131	0.019214	1.24068e-236	-0.214672	0.148661	0.14873	0.0461541	6	-0.506048	0.0767036	0.806806	0.602874	1.07972	0.807(0.603,1.08)	0.922822
	ENSG00000116288	1	PARK7	8029958	rs35675666	1	8021973	T	G	0.16004	-0.0689586	0.0477241	0.148473	0.409378	0.0107042	0	-0.168447	0.11666	0.148763	0.505732	20	-0.397101	0.0602066	0.844976	0.672266	1.06206	0.845(0.672,1.062)	0.922822
	ENSG00000173230	3	GOLGB1	121425324	rs59987610	3	121407365	C	T	0.126243	0.0746306	0.0516897	0.14879	-0.804254	0.0116501	0	-0.0927948	0.0642845	0.148879	0.350069	20	-0.218792	0.0332028	0.91138	0.803488	1.03376	0.911(0.803,1.034)	0.922822
	ENSG00000135341	6	MAP3K7	91260028	rs17747150	6	91289884	G	A	0.303181	0.0543857	0.0378057	0.150276	-0.168732	0.00874894	7.0415e-83	-0.32232	0.22468	0.151409	0.459045	20	-0.762693	0.118053	0.724466	0.466409	1.1253	0.724(0.466,1.125)	0.922822
	ENSG00000114529	3	C3orf52	111827516	rs10511304	3	111793957	A	G	0.188867	0.0624143	0.0432209	0.148718	-0.124894	0.0101543	9.10238e-35	-0.499738	0.348437	0.151508	0.451629	20	-1.18267	0.183199	0.60669	0.306458	1.20105	0.607(0.306,1.201)	0.922822
	ENSG00000116044	2	NFE2L2	178174874	rs1806649	2	178118152	T	C	0.267396	-0.0586225	0.0400013	0.142781	0.0653408	0.00939533	3.53558e-12	-0.897181	0.62564	0.151567	0.967124	20	-2.12344	0.329073	0.407717	0.11962	1.38968	0.408(0.12,1.39)	0.922822
	ENSG00000118260	2	CREB1	208431308	rs13027546	2	208359507	C	G	0.163022	-0.0665759	0.0463158	0.150595	0.16986	0.0108817	6.26284e-55	-0.391946	0.273825	0.152322	0.86151	20	-0.928643	0.144751	0.675741	0.395089	1.15575	0.676(0.395,1.156)	0.922822
	ENSG00000206503	6	HLA-A	29911349	rs2734907	6	29901640	A	C	0.355865	0.106794	0.0746451	0.152518	0.557783	0.0114296	0	0.191462	0.133882	0.152694	0.863387	20	-0.0709467	0.453871	1.21102	0.931512	1.57439	1.211(0.932,1.574)	0.922822
	ENSG00000150093	10	ITGB1	33241983	rs1187051	10	33306432	A	G	0.459245	-0.049245	0.0341408	0.149186	0.0720175	0.00796266	1.50491e-19	-0.683793	0.480053	0.154327	0.0826826	20	-1.6247	0.257111	0.504699	0.196971	1.29319	0.505(0.197,1.293)	0.922822
	ENSG00000152952	3	PLOD2	145834333	rs2864794	3	145866370	G	C	0.133201	0.0749027	0.0522146	0.151425	0.121325	0.0112842	5.8116e-27	0.617372	0.434183	0.15505	0.0116953	15	-0.233627	1.46837	1.85405	0.791657	4.34215	1.854(0.792,4.342)	0.922822
	ENSG00000151092	3	NGLY1	25795982	rs7645628	3	25664643	A	T	0.276342	0.0554448	0.0387359	0.152329	-0.103296	0.00898087	1.2919e-30	-0.536756	0.377891	0.155492	0.906138	20	-1.27742	0.20391	0.584642	0.278755	1.22619	0.585(0.279,1.226)	0.922822
	ENSG00000123684	1	LPGAT1	211960456	rs28824895	1	212030986	C	A	0.316103	0.0533071	0.0375684	0.155918	-0.248975	0.00853444	4.26835e-187	-0.214106	0.151071	0.156407	0.667301	20	-0.510205	0.0819932	0.807263	0.600372	1.08545	0.807(0.6,1.085)	0.922822
	ENSG00000143819	1	EPHX1	226015527	rs1009668	1	226040404	T	C	0.111332	0.0816702	0.0577042	0.156973	-0.159197	0.0128003	1.6457e-35	-0.513014	0.364811	0.15965	0.56143	20	-1.22804	0.202016	0.598688	0.292865	1.22387	0.599(0.293,1.224)	0.922822
	ENSG00000008394	12	MGST1	16631134	rs4149190	12	16502260	A	T	0.0586481	0.0972587	0.0691111	0.159345	-0.38738	0.0156365	1.70959e-135	-0.251068	0.178694	0.160017	0.712291	18	-0.601308	0.0991722	0.777969	0.548094	1.10426	0.778(0.548,1.104)	0.922822
	ENSG00000103415	16	HMOX2	4542519	rs1898737	16	4518205	G	A	0.275348	0.0591865	0.0419286	0.158067	0.115319	0.00900209	1.43761e-37	0.513243	0.36579	0.160584	0.294561	20	-0.203705	1.23019	1.6707	0.815703	3.42188	1.671(0.816,3.422)	0.922822
	ENSG00000132646	20	PCNA	5101435	rs6053130	20	5111706	T	G	0.0924453	-0.0858636	0.0609164	0.158678	-0.186617	0.0143866	1.77292e-38	0.460106	0.328346	0.161129	0.651963	20	-0.183452	1.10366	1.58424	0.832392	3.01519	1.584(0.832,3.015)	0.922822
	ENSG00000175166	3	PSMD2	184021669	rs13062950	3	184027539	T	G	0.471173	0.048624	0.0347421	0.161642	-0.273975	0.0116421	1.86576e-122	-0.177476	0.127032	0.162383	0.436335	20	-0.426459	0.0715067	0.837381	0.652817	1.07413	0.837(0.653,1.074)	0.922822
	ENSG00000100985	20	MMP9	44641373	rs13925	20	44644965	A	G	0.17495	-0.0658248	0.0471295	0.16251	0.238272	0.0110944	2.56583e-102	-0.276258	0.198215	0.163398	0.173148	20	-0.664759	0.112243	0.758617	0.514397	1.11879	0.759(0.514,1.119)	0.922822
	ENSG00000131981	14	LGALS3	55601477	rs7141706	14	55686601	G	C	0.0974155	-0.0870457	0.06156	0.157362	-0.103	0.013869	1.1142e-13	0.845107	0.608408	0.164819	0.447876	20	-0.347373	2.03759	2.32823	0.706542	7.67207	2.328(0.707,7.672)	0.922822
	ENSG00000220205	17	VAMP2	8064665	rs80283923	17	8067755	T	C	0.0467197	-0.117605	0.0848028	0.165502	-0.271512	0.0166637	1.0958e-59	0.433148	0.313465	0.167031	0.623235	20	-0.181243	1.04754	1.5421	0.834232	2.85063	1.542(0.834,2.851)	0.922822
	ENSG00000104635	8	SLC39A14	22258202	rs4872485	8	22255990	T	G	0.492048	0.0486669	0.0347293	0.161117	-0.070585	0.00867991	4.22258e-16	-0.689479	0.499272	0.167289	0.252866	20	-1.66805	0.289094	0.501837	0.188614	1.33522	0.502(0.189,1.335)	0.922822
	ENSG00000053501	19	USE1	17328396	rs34180454	19	17300714	T	A	0.178926	0.0621412	0.0445805	0.163345	0.161092	0.0171517	5.87603e-21	0.385749	0.27977	0.167954	0.722282	20	-0.1626	0.934098	1.47072	0.849931	2.54492	1.471(0.85,2.545)	0.922822
	ENSG00000168439	11	STIP1	63962379	rs882147	11	63976689	A	T	0.38668	-0.0500723	0.035263	0.155617	0.0457131	0.00811639	1.7793e-08	-1.09536	0.795536	0.168548	0.81827	20	-2.65461	0.463891	0.334419	0.0703262	1.59025	0.334(0.07,1.59)	0.922822
	ENSG00000091513	3	TF	133481325	rs12634591	3	133367858	C	T	0.10338	-0.0765652	0.055551	0.168115	-0.205385	0.0120728	6.66854e-65	0.372788	0.271359	0.169509	0.14059	20	-0.159076	0.904652	1.45178	0.852932	2.47107	1.452(0.853,2.471)	0.922822
	ENSG00000122025	13	FLT3	28626070	rs112634401	13	28688715	C	T	0.152087	0.0673298	0.0484611	0.164724	-0.0950571	0.0108528	1.9734e-18	-0.708308	0.516184	0.170001	0.981316	13	-1.72003	0.303413	0.492477	0.179061	1.35447	0.492(0.179,1.354)	0.922822
	ENSG00000101266	20	CSNK2A1	491799	rs58317189	20	500293	T	C	0.0765408	0.100359	0.0715988	0.161011	-0.113251	0.017573	1.1591e-10	-0.886164	0.646996	0.170793	0.073667	5	-2.15428	0.381948	0.412234	0.115987	1.46514	0.412(0.116,1.465)	0.922822
	ENSG00000111640	12	GAPDH	6645315	rs9634157	12	6648198	G	A	0.220676	-0.0578604	0.0425282	0.173667	-0.395194	0.0112926	2.5972e-268	0.14641	0.107695	0.173991	0.274158	20	-0.0646722	0.357492	1.15767	0.937375	1.42974	1.158(0.937,1.43)	0.922822
	ENSG00000130714	9	POMT1	134388741	rs3824395	9	134398719	T	C	0.0596421	-0.11746	0.086852	0.176243	0.639926	0.0210138	1.10665e-203	-0.183552	0.135856	0.176669	0.636601	20	-0.44983	0.0827258	0.832309	0.637737	1.08624	0.832(0.638,1.086)	0.922822
	ENSG00000072210	17	ALDH3A2	19566180	rs11204407	17	19552719	G	A	0.290258	0.0512595	0.0380904	0.178388	-0.179729	0.0085815	2.13716e-97	-0.285204	0.212369	0.179283	0.984873	20	-0.701447	0.131039	0.751861	0.495867	1.14001	0.752(0.496,1.14)	0.922822
	ENSG00000026025	10	VIM	17274925	rs165530	10	17281756	A	C	0.262425	0.0555842	0.041287	0.178209	-0.240431	0.0132789	2.84738e-73	-0.231186	0.172195	0.179407	0.319616	20	-0.568688	0.106316	0.793592	0.566268	1.11217	0.794(0.566,1.112)	0.922822
	ENSG00000113615	5	SEC24A	134023996	rs12153284	5	134003275	C	T	0.282306	-0.0564575	0.0412053	0.170639	-0.0521334	0.00884997	3.8433e-09	1.08294	0.811479	0.18203	0.920333	19	-0.507559	2.67344	2.95335	0.601963	14.4897	2.953(0.602,14.49)	0.922822
	ENSG00000163933	3	RFT1	53143488	rs2336725	3	53118739	C	T	0.403579	-0.0466486	0.034946	0.181917	0.298212	0.00860861	6.08196e-263	-0.156428	0.117272	0.182241	0.182138	20	-0.386281	0.0734251	0.855193	0.679579	1.07619	0.855(0.68,1.076)	0.922822
	ENSG00000108588	17	CCDC47	61838160	rs721575	17	61782920	C	T	0.460239	0.0459845	0.0345318	0.182974	-0.124022	0.00800026	3.3521e-54	-0.370778	0.279459	0.184585	0.283331	20	-0.918518	0.176962	0.690197	0.39911	1.19359	0.69(0.399,1.194)	0.922822
	ENSG00000164867	7	NOS3	150699879	rs1800781	7	150692444	A	G	0.16004	-0.0708622	0.0534636	0.185029	-0.294259	0.0110968	6.0908e-155	0.240816	0.181916	0.185578	0.335383	20	-0.115739	0.597371	1.27229	0.890707	1.81734	1.272(0.891,1.817)	0.922822
	ENSG00000099246	10	RAB18	27812170	rs2808284	10	27860019	T	C	0.512922	-0.0478448	0.0361116	0.185199	0.110118	0.00796402	1.75178e-43	-0.434485	0.329436	0.187211	0.573671	20	-1.08018	0.21121	0.647598	0.339535	1.23517	0.648(0.34,1.235)	0.922822
	ENSG00000115310	2	RTN4	55269541	rs10170340	2	55222106	T	C	0.409543	-0.0461694	0.0350115	0.187273	0.291785	0.00791152	9.31828e-298	-0.158231	0.120068	0.187554	0.421731	20	-0.393564	0.0771023	0.853653	0.674648	1.08015	0.854(0.675,1.08)	0.922822
	ENSG00000145907	5	G3BP1	151171476	rs2964565	5	151273630	G	A	0.397614	-0.0471037	0.0352957	0.182026	-0.0685318	0.00820858	6.89599e-17	0.687326	0.521565	0.187566	0.662929	20	-0.334941	1.70959	1.98839	0.71538	5.52671	1.988(0.715,5.527)	0.922822
	ENSG00000117394	1	SLC2A1	43407791	rs841572	1	43436051	A	G	0.403579	-0.0466866	0.0351416	0.184004	-0.0826125	0.00806464	1.2618e-24	0.565127	0.428941	0.187673	0.265606	20	-0.275597	1.40585	1.75967	0.759119	4.079	1.76(0.759,4.079)	0.922822
	ENSG00000204520	6	MICA	31377224	rs1056429	6	31321883	A	G	0.100398	0.0843899	0.0643069	0.189419	0.91551	0.0239688	0	0.0921781	0.0702831	0.18968	0.706371	20	-0.0455768	0.229933	1.09656	0.955446	1.25852	1.097(0.955,1.259)	0.922822
	ENSG00000104231	8	ZFAND1	82629353	rs55640701	8	82551928	C	G	0.15507	0.0647301	0.0493561	0.189692	-0.359688	0.0119426	2.808e-199	-0.179962	0.137349	0.190111	0.102657	20	-0.449166	0.089242	0.835302	0.63816	1.09335	0.835(0.638,1.093)	0.922822
	ENSG00000143870	2	PDIA6	10950810	rs1734338	2	10935528	T	C	0.473161	-0.045185	0.0345058	0.190368	-0.328031	0.0115463	1.52157e-177	0.137746	0.105302	0.190838	0.118827	20	-0.0686459	0.344138	1.14768	0.933657	1.41077	1.148(0.934,1.411)	0.922822
	ENSG00000196954	11	CASP4	104826878	rs666695	11	104826624	G	C	0.338966	-0.0469054	0.0358436	0.190665	0.108067	0.00818181	7.86841e-40	-0.43404	0.333304	0.192835	0.654041	20	-1.08732	0.219236	0.647886	0.33712	1.24512	0.648(0.337,1.245)	0.922822
	ENSG00000105829	7	BET1	93612884	rs7804417	7	93649396	G	A	0.332008	-0.04806	0.036922	0.193031	-0.247147	0.00863707	4.40982e-180	0.194459	0.149547	0.193492	0.916845	18	-0.0986531	0.487571	1.21465	0.906057	1.62836	1.215(0.906,1.628)	0.922822
	ENSG00000148396	9	SEC16A	139353345	rs4378078	9	139375962	G	A	0.410537	0.0470656	0.0361793	0.193293	-0.324849	0.00935158	2.15557e-264	-0.144885	0.111451	0.193605	0.806867	20	-0.363329	0.073559	0.865122	0.695358	1.07633	0.865(0.695,1.076)	0.922822
	ENSG00000101182	20	PSMA7	60715143	rs1475224	20	60726139	C	T	0.0646123	-0.0977157	0.0747905	0.191374	-0.159225	0.0177473	2.9171e-19	0.613696	0.474671	0.19605	0.418111	18	-0.316659	1.54405	1.84725	0.728579	4.68353	1.847(0.729,4.684)	0.922822
	ENSG00000149809	11	TM7SF2	64881586	rs11539360	11	64880743	T	C	0.0347913	0.100337	0.0778487	0.197445	-0.442021	0.0202315	8.08573e-106	-0.226995	0.176426	0.198223	0.165815	20	-0.57279	0.1188	0.796925	0.56395	1.12614	0.797(0.564,1.126)	0.922822
	ENSG00000213639	2	PPP1CB	29000156	rs13011935	2	29014746	C	T	0.513917	0.044591	0.0346784	0.198497	-0.493525	0.00745944	0	-0.0903519	0.0702799	0.198582	0.961319	20	-0.228101	0.0473967	0.91361	0.796044	1.04854	0.914(0.796,1.049)	0.922822
	ENSG00000187486	11	KCNJ11	17409142	rs2074310	11	17421886	T	C	0.349901	0.0467196	0.0361693	0.196464	0.157188	0.012183	4.37435e-38	0.297221	0.231252	0.198699	0.186383	20	-0.156033	0.750475	1.34611	0.855531	2.11801	1.346(0.856,2.118)	0.922822
	ENSG00000132376	17	INPP5K	1409023	rs76739945	17	1416955	T	C	0.0646123	-0.087947	0.0687833	0.201034	-0.648484	0.0170888	0	0.135619	0.106128	0.20129	0.431583	20	-0.0723919	0.34363	1.14525	0.930166	1.41006	1.145(0.93,1.41)	0.922822
	ENSG00000127463	1	EMC1	19560102	rs2275403	1	19557713	G	C	0.484095	-0.0448186	0.0351406	0.202164	0.268671	0.00873951	1.55946e-207	-0.166816	0.130907	0.202552	0.157012	20	-0.423394	0.0897617	0.846355	0.654821	1.09391	0.846(0.655,1.094)	0.922822
	ENSG00000064012	2	CASP8	202125300	rs7560328	2	202164837	A	C	0.385686	0.0457488	0.0359322	0.202949	-0.21219	0.00808379	7.37652e-152	-0.215603	0.169539	0.20348	0.830133	20	-0.547899	0.116693	0.806055	0.578163	1.12377	0.806(0.578,1.124)	0.922822
	ENSG00000136634	1	IL10	206943393	rs1518111	1	206944645	T	C	0.220676	-0.0531181	0.0417714	0.203501	-0.198846	0.00946127	4.60454e-98	0.267133	0.210454	0.204328	0.199698	20	-0.145357	0.679623	1.30621	0.864714	1.97313	1.306(0.865,1.973)	0.922822
	ENSG00000044574	9	HSPA5	128000370	rs55812349	9	127980550	A	G	0.0685885	0.0849592	0.0664879	0.201315	0.161548	0.01685	9.03338e-22	0.525908	0.415207	0.205293	0.918542	18	-0.287898	1.33971	1.69199	0.749838	3.81795	1.692(0.75,3.818)	0.922822
	ENSG00000136699	2	SMPD4	130924652	rs10909567	2	130925088	T	C	0.342942	0.0540626	0.0427513	0.20602	0.171135	0.00886887	5.78073e-83	0.315905	0.250345	0.206993	0.55036	20	-0.174771	0.806581	1.3715	0.839649	2.24024	1.371(0.84,2.24)	0.922822
	ENSG00000103502	16	CDIPT	29872367	rs7189550	16	29911260	A	G	0.33002	0.0482948	0.0380093	0.203869	0.0895525	0.00904041	3.9281e-23	0.53929	0.427913	0.207568	0.377049	20	-0.299419	1.378	1.71479	0.741248	3.96696	1.715(0.741,3.967)	0.922822
	ENSG00000163631	4	ALB	74274980	rs75927529	4	74023687	G	A	0.107356	-0.0720379	0.0557562	0.196351	-0.112993	0.0202445	2.38589e-08	0.637546	0.506499	0.208127	0.510669	20	-0.355192	1.63028	1.89183	0.701039	5.10532	1.892(0.701,5.105)	0.922822
	ENSG00000103335	16	PIEZO1	88816685	rs56158123	16	88797110	G	C	0.22167	0.0554243	0.0440902	0.20873	0.32175	0.0125752	2.18404e-144	0.172259	0.137198	0.209279	0.569909	20	-0.0966491	0.441167	1.18799	0.907875	1.55452	1.188(0.908,1.555)	0.922822
	ENSG00000157764	7	BRAF	140524753	rs1044927	7	140702682	C	T	0.204771	-0.0531833	0.0416226	0.201337	0.0883164	0.0141878	4.82171e-10	-0.60219	0.481116	0.210696	0.320726	20	-1.54518	0.340797	0.547611	0.213274	1.40607	0.548(0.213,1.406)	0.922822
	ENSG00000147889	9	CDKN2A	21981525	rs2188127	9	21965232	G	C	0.141153	0.0674397	0.0534265	0.206844	0.122487	0.0129167	2.47551e-21	0.550587	0.440029	0.210842	0.0440522	17	-0.31187	1.41304	1.73427	0.732077	4.10844	1.734(0.732,4.108)	0.922822
	ENSG00000157601	21	MX1	42811686	rs464783	21	42796480	T	C	0.389662	0.0437644	0.0350414	0.21169	-0.467407	0.00770207	0	-0.0936324	0.0749858	0.211786	0.0183785	20	-0.240605	0.0533398	0.910617	0.786152	1.05479	0.911(0.786,1.055)	0.922822
	ENSG00000108821	17	COL1A1	48269821	rs9898186	17	48278507	T	C	0.206759	-0.0684469	0.0541574	0.206283	0.0840469	0.010457	9.17649e-16	-0.81439	0.652289	0.211844	0.540611	10	-2.09288	0.464096	0.442909	0.123332	1.59058	0.443(0.123,1.591)	0.922822
	ENSG00000182158	7	CREB3L2	137623269	rs273960	7	137597005	T	C	0.373757	0.0444844	0.0352494	0.206952	0.0650047	0.00814493	1.45151e-15	0.684326	0.548996	0.212579	0.7712	13	-0.391706	1.76036	1.98244	0.675903	5.81452	1.982(0.676,5.815)	0.922822
	ENSG00000021574	2	SPAST	32335693	rs12712326	2	32384194	G	C	0.17495	0.0652685	0.0516304	0.206177	-0.0851451	0.0115536	1.7114e-13	-0.766556	0.615238	0.212783	0.604669	20	-1.97242	0.43931	0.46461	0.139119	1.55164	0.465(0.139,1.552)	0.922822
	ENSG00000124783	6	SSR1	7308109	rs57780800	6	7322780	C	A	0.12326	-0.0772653	0.0620355	0.212947	-0.396901	0.0123688	6.31841e-226	0.194671	0.156417	0.213291	0.630402	20	-0.111906	0.501248	1.21491	0.894128	1.65078	1.215(0.894,1.651)	0.922822
	ENSG00000042832	8	TG	134013175	rs988068	8	133791111	T	C	0.360835	-0.0444146	0.0357022	0.213489	0.257952	0.00820079	3.64319e-217	-0.172182	0.138515	0.213847	0.256067	20	-0.443671	0.0993074	0.841826	0.641676	1.10441	0.842(0.642,1.104)	0.922822
	ENSG00000231852	6	CYP21A2	32007744	rs1150753	6	32059867	G	A	0.0755467	-0.075065	0.0603555	0.213604	0.468653	0.0227479	2.63343e-94	-0.160172	0.129019	0.214438	0.459689	20	-0.413049	0.0927052	0.851997	0.66163	1.09714	0.852(0.662,1.097)	0.922822
	ENSG00000078401	6	EDN1	12294011	rs557768	6	12223428	T	C	0.454274	-0.0439762	0.0353476	0.21346	-0.11936	0.00803859	7.12486e-50	0.368433	0.29718	0.215063	0.0388779	20	-0.21404	0.950906	1.44547	0.807316	2.58805	1.445(0.807,2.588)	0.922822
	ENSG00000105135	19	ILVBL	15231195	rs4808217	19	15240815	A	G	0.135189	0.0685945	0.0554601	0.216151	0.311534	0.0120652	5.17963e-147	0.220183	0.178227	0.216677	0.926724	20	-0.129142	0.569508	1.2463	0.878849	1.7674	1.246(0.879,1.767)	0.922822
	ENSG00000171867	20	PRNP	4674559	rs6084822	20	4643196	G	A	0.479125	0.0428176	0.0346182	0.216143	0.169038	0.00791059	2.61875e-101	0.253301	0.205138	0.216911	0.884865	20	-0.148769	0.655371	1.28827	0.861768	1.92586	1.288(0.862,1.926)	0.922822
	ENSG00000133703	12	KRAS	25380796	rs11047909	12	25384838	A	G	0.412525	-0.0453673	0.0364567	0.213346	-0.0689514	0.00797531	5.35231e-18	0.657961	0.534179	0.218053	0.87013	20	-0.38903	1.70495	1.93085	0.677714	5.50112	1.931(0.678,5.501)	0.922822
	ENSG00000160014	19	CALM3	47109190	rs7260181	19	47098427	C	T	0.474155	0.043141	0.0350915	0.218928	0.161816	0.00796639	9.99007e-92	0.266604	0.217257	0.21977	0.971184	20	-0.15922	0.692428	1.30552	0.852809	1.99856	1.306(0.853,1.999)	0.922822
	ENSG00000138073	2	PREB	27355583	rs2304678	2	27353507	C	G	0.166998	0.0577449	0.0469347	0.218575	-0.183108	0.0119353	4.01892e-53	-0.315359	0.257145	0.220053	0.583681	20	-0.819363	0.188645	0.729527	0.440712	1.20761	0.73(0.441,1.208)	0.922822
	ENSG00000186081	12	KRT5	52911415	rs611403	12	52929049	G	T	0.370775	0.0440012	0.0359348	0.220773	-0.201061	0.00930751	1.72009e-103	-0.218845	0.179013	0.221514	0.977643	20	-0.56971	0.13202	0.803446	0.565689	1.14113	0.803(0.566,1.141)	0.922822
	ENSG00000164305	4	CASP3	185559756	rs72689261	4	185590897	A	C	0.115308	0.0619638	0.0507472	0.222075	-0.489507	0.0118499	0	-0.126584	0.103715	0.222277	0.994297	20	-0.329865	0.0766974	0.8811	0.719021	1.07972	0.881(0.719,1.08)	0.922822
	ENSG00000154889	18	MPPE1	11895921	rs113373974	18	11917083	A	C	0.11829	-0.063286	0.0518686	0.222419	-0.670383	0.0115939	0	0.0944026	0.0773887	0.222522	0.048815	20	-0.0572793	0.246084	1.099	0.94433	1.27901	1.099(0.944,1.279)	0.922822
	ENSG00000134250	1	NOTCH2	120533208	rs1493696	1	120505532	A	G	0.130219	-0.0644374	0.0526721	0.22119	-0.161544	0.0113156	3.07936e-46	0.398884	0.327249	0.222881	0.698214	20	-0.242524	1.04029	1.49016	0.784645	2.83004	1.49(0.785,2.83)	0.922822
	ENSG00000141564	17	RPTOR	78729395	rs4062178	17	78676905	C	T	0.180915	-0.0532186	0.0438306	0.224676	-0.341037	0.0101999	4.19571e-245	0.15605	0.128606	0.224981	0.914661	20	-0.0960178	0.408118	1.16888	0.908448	1.50398	1.169(0.908,1.504)	0.922822
	ENSG00000174851	11	YIF1A	66054346	rs2155030	11	66030687	G	A	0.173956	-0.0541304	0.0445095	0.223926	-0.192082	0.0107529	2.28169e-71	0.281809	0.232258	0.224997	0.31591	20	-0.173417	0.737035	1.32553	0.840787	2.08973	1.326(0.841,2.09)	0.922822
	ENSG00000158552	2	ZFAND2B	220067166	rs6753739	2	220028900	A	G	0.250497	-0.0506991	0.0409693	0.215905	0.0589593	0.00995766	3.1999e-09	-0.8599	0.709888	0.225774	0.985831	11	-2.25128	0.53148	0.423204	0.105264	1.70145	0.423(0.105,1.701)	0.922822
	ENSG00000184743	11	ATL3	63415476	rs72932267	11	63438299	A	T	0.124254	0.092652	0.0768206	0.227785	0.282233	0.0143581	5.05627e-86	0.328282	0.2727	0.228659	0.124545	17	-0.20621	0.862774	1.38858	0.813662	2.36973	1.389(0.814,2.37)	0.922822
	ENSG00000157916	1	RER1	2329228	rs12742461	1	2314463	T	G	0.304175	0.0439219	0.0362628	0.225815	-0.0859041	0.00848368	4.24489e-24	-0.51129	0.425141	0.229117	0.463422	18	-1.34457	0.321986	0.599721	0.260653	1.37987	0.6(0.261,1.38)	0.922822
	ENSG00000091039	12	OSBPL8	76849583	rs10862247	12	77020959	A	G	0.121272	0.0610493	0.0509312	0.230659	0.91473	0.0158122	0	0.0667402	0.0556909	0.230759	0.693695	20	-0.042414	0.175894	1.06902	0.958473	1.19231	1.069(0.958,1.192)	0.922822
	ENSG00000110330	11	BIRC2	102233671	rs11827872	11	102262244	T	G	0.084493	-0.0845977	0.0700168	0.226952	-0.0960918	0.0149806	1.4138e-10	0.880384	0.741459	0.235083			-0.572876	2.33364	2.41183	0.563902	10.3155	2.412(0.564,10.315)	0.922822
	ENSG00000174775	11	HRAS	534764	rs1870726	11	539648	A	G	0.202783	-0.0709682	0.059775	0.235127	-0.315593	0.011736	2.79855e-159	0.224872	0.18959	0.235583	0.0606541	20	-0.146724	0.596468	1.25216	0.863532	1.8157	1.252(0.864,1.816)	0.922822
	ENSG00000142082	11	SIRT3	226194	rs72878032	11	212408	T	C	0.213718	0.0504317	0.0424624	0.23496	0.206724	0.00965917	1.28551e-101	0.243957	0.205723	0.23568	0.109697	20	-0.15926	0.647174	1.27629	0.852775	1.91014	1.276(0.853,1.91)	0.922822
	ENSG00000198929	1	NOS1AP	162196442	rs10753789	1	162306207	G	A	0.371769	0.0425588	0.0355632	0.231419	0.0705338	0.00835609	3.1463e-17	0.603382	0.509242	0.236072	0.824899	14	-0.394732	1.6015	1.82829	0.67386	4.96045	1.828(0.674,4.96)	0.922822
	ENSG00000105438	19	KDELR1	48890318	rs433956	19	48891537	G	A	0.482107	0.0419304	0.0351673	0.233139	0.0804496	0.00796468	5.4793e-24	0.5212	0.440169	0.236377	0.153513	20	-0.341531	1.38393	1.68405	0.710681	3.99056	1.684(0.711,3.991)	0.922822
	ENSG00000125744	19	RTN2	45994433	rs73567098	19	45994559	T	A	0.0984095	0.0686483	0.05807	0.237141	-0.245073	0.0126038	3.25043e-84	-0.280114	0.237388	0.238006	0.215812	20	-0.745394	0.185166	0.755698	0.474547	1.20342	0.756(0.475,1.203)	0.922822
	ENSG00000164733	8	CTSB	11713495	rs1296022	8	11722355	A	G	0.277336	0.0471961	0.0400377	0.238482	-0.370598	0.00846085	0	-0.127351	0.108075	0.238651	0.731774	20	-0.339178	0.084476	0.880425	0.712356	1.08815	0.88(0.712,1.088)	0.922822
	ENSG00000198363	8	ASPH	62520135	rs7014115	8	62649567	G	T	0.131213	0.0643314	0.0547598	0.240077	0.468158	0.0131401	5.12772e-278	0.137414	0.117032	0.240333	0.507616	20	-0.0919687	0.366797	1.1473	0.912134	1.4431	1.147(0.912,1.443)	0.922822
	ENSG00000162191	11	UBXN1	62445268	rs10897288	11	62386472	A	T	0.306163	0.0505219	0.0424214	0.233672	0.0600361	0.00961994	4.3534e-10	0.841526	0.71935	0.242065	0.920308	17	-0.5684	2.25145	2.3199	0.566431	9.50152	2.32(0.566,9.502)	0.922822
	ENSG00000144468	2	RHBDD1	227782114	rs35640476	2	227943838	A	G	0.0685885	-0.0860368	0.0726431	0.236264	-0.109783	0.0158271	4.0222e-12	0.783696	0.671271	0.243016	0.867537	4	-0.531995	2.09939	2.18955	0.587432	8.16117	2.19(0.587,8.161)	0.922822
	ENSG00000139192	12	TAPBPL	6568269	rs2243977	12	6569983	T	C	0.304175	0.0444098	0.0380892	0.243638	0.847209	0.0073307	0	0.0524189	0.0449608	0.243662	0.339585	20	-0.0357043	0.140542	1.05382	0.964926	1.1509	1.054(0.965,1.151)	0.922822
	ENSG00000136986	8	DERL1	124040033	rs11691	8	124027508	T	C	0.0616302	0.076687	0.0657821	0.243706	0.193276	0.0148809	1.42739e-38	0.396776	0.341722	0.245599	0.0452164	20	-0.272999	1.06655	1.48702	0.761093	2.90534	1.487(0.761,2.905)	0.922822
	ENSG00000170881	8	RNF139	125493567	rs7009847	8	125455992	A	G	0.223658	-0.0512269	0.0439308	0.243581	0.14435	0.0150302	7.69006e-22	-0.354879	0.30657	0.247035	0.963211	19	-0.955756	0.245998	0.701258	0.384521	1.2789	0.701(0.385,1.279)	0.922822
	ENSG00000074370	17	ATP2A3	3847452	rs11078476	17	3820239	G	C	0.277336	-0.0486369	0.042094	0.247912	-0.138683	0.0100884	5.32328e-43	0.350705	0.304596	0.249578	0.755679	20	-0.246303	0.947713	1.42007	0.781685	2.5798	1.42(0.782,2.58)	0.922822
	ENSG00000057252	1	SOAT1	179295370	rs10913728	1	179312235	A	G	0.340954	0.040969	0.0355979	0.24978	-0.353684	0.00786547	0	-0.115835	0.100682	0.249935	0.535452	20	-0.313172	0.0815017	0.890622	0.731124	1.08492	0.891(0.731,1.085)	0.922822
	ENSG00000145817	5	YIPF5	143544000	rs6864309	5	143550217	T	G	0.172962	-0.0519383	0.0452517	0.251066	-0.709679	0.0096582	0	0.0731856	0.0637714	0.251124	0.562086	20	-0.0518063	0.198178	1.07593	0.949513	1.21918	1.076(0.95,1.219)	0.922822
	ENSG00000150995	3	ITPR1	4712278	rs62231426	3	4516914	A	G	0.083499	0.0716243	0.0624269	0.251244	-0.419545	0.0142202	2.60378e-191	-0.170719	0.148909	0.251603	0.0330095	20	-0.462581	0.121143	0.843058	0.629657	1.12879	0.843(0.63,1.129)	0.922822
	ENSG00000223380	1	SEC22B	145106571	rs61707577	1	145095802	C	T	0.116302	-0.109763	0.0954651	0.250238	-0.326707	0.0290344	2.2537e-29	0.335968	0.293726	0.2527	0.257406	4	-0.239735	0.911671	1.39929	0.786836	2.48848	1.399(0.787,2.488)	0.922822
	ENSG00000165806	10	CASP7	115464802	rs4353229	10	115489589	C	T	0.254473	0.0443514	0.0388164	0.253208	-0.592229	0.00830595	0	-0.0748889	0.0655513	0.253269	0.783584	20	-0.203369	0.0535916	0.927847	0.815977	1.05505	0.928(0.816,1.055)	0.922822
	ENSG00000176720	2	BOK	242505841	rs6754085	2	242510779	C	T	0.327038	0.0488989	0.0429075	0.254439	-0.290232	0.0085498	1.39268e-252	-0.168482	0.147922	0.254706	0.350585	20	-0.458409	0.121445	0.844946	0.632289	1.12913	0.845(0.632,1.129)	0.922822
	ENSG00000162600	1	OMA1	58946765	rs60726128	1	59008472	A	G	0.181909	0.0522477	0.0460933	0.256996	0.347109	0.0104055	5.52167e-244	0.150522	0.132869	0.25727	0.541575	20	-0.109901	0.410945	1.16244	0.895923	1.50824	1.162(0.896,1.508)	0.922822
	ENSG00000172270	19	BSG	577395	rs73918144	19	583899	G	T	0.109344	-0.102445	0.0906934	0.258655	-0.528608	0.0170594	8.24542e-211	0.193802	0.171684	0.258971	0.661375	20	-0.142699	0.530303	1.21386	0.867015	1.69945	1.214(0.867,1.699)	0.922822
	ENSG00000095303	9	PTGS1	125145403	rs62575596	9	125189590	A	G	0.138171	0.0608401	0.0538869	0.258884	-0.155579	0.0122207	3.98731e-37	-0.391056	0.347723	0.26075	0.952312	20	-1.07259	0.290481	0.676342	0.34212	1.33707	0.676(0.342,1.337)	0.922822
	ENSG00000147649	8	MTDH	98698702	rs11786529	8	98357482	T	C	0.0407555	0.0857157	0.0762016	0.260651	0.185247	0.0164418	1.91399e-29	0.462711	0.413398	0.263017	0.931246	15	-0.347549	1.27297	1.58837	0.706417	3.57145	1.588(0.706,3.571)	0.922822
	ENSG00000168610	17	STAT3	40502964	rs1053004	17	40466092	G	A	0.379722	0.0433365	0.0388553	0.264708	-0.139939	0.00823965	1.08609e-64	-0.309682	0.278257	0.265736	0.456944	20	-0.855066	0.235702	0.73368	0.425255	1.2658	0.734(0.425,1.266)	0.922822
	ENSG00000172339	1	ALG14	95493399	rs61772226	1	95545086	T	C	0.0675944	-0.08194	0.0731844	0.262868	-0.10114	0.0170201	2.8088e-09	0.810164	0.736327	0.271211	0.0504672	14	-0.633037	2.25336	2.24828	0.530977	9.51972	2.248(0.531,9.52)	0.922822
	ENSG00000100292	22	HMOX1	35783280	rs133415	22	35806238	T	G	0.136183	0.0536579	0.0489345	0.272849	-0.352072	0.0113321	6.41808e-212	-0.152406	0.139076	0.273148	0.989935	20	-0.424995	0.120183	0.85864	0.653773	1.1277	0.859(0.654,1.128)	0.922822
	ENSG00000127914	7	AKAP9	91655084	rs12540565	7	91633213	G	T	0.385686	0.0390273	0.0354724	0.271238	-0.0747716	0.00817998	6.19917e-20	-0.521954	0.477834	0.274687	0.23727	20	-1.45851	0.414601	0.59336	0.232583	1.51377	0.593(0.233,1.514)	0.922822
	ENSG00000121653	11	MAPK8IP1	45917609	rs17787136	11	45894636	G	C	0.237575	-0.0459963	0.042276	0.276595	0.585398	0.0127231	0	-0.0785727	0.0722378	0.276729	0.133921	20	-0.220159	0.0630134	0.924435	0.802391	1.06504	0.924(0.802,1.065)	0.922822
	ENSG00000084733	2	RAB10	26308649	rs11688934	2	26215034	A	G	0.111332	-0.0639452	0.0584674	0.274091	0.217225	0.0210612	6.09117e-25	-0.294372	0.270664	0.276775	0.764744	20	-0.824873	0.236129	0.744999	0.43829	1.26634	0.745(0.438,1.266)	0.922822
	ENSG00000170876	3	TMEM43	14175809	rs57196972	3	14166280	T	C	0.135189	-0.05897	0.0542632	0.277152	0.173353	0.0121508	3.52383e-46	-0.340173	0.313929	0.278542	0.228384	20	-0.955474	0.275128	0.711647	0.38463	1.3167	0.712(0.385,1.317)	0.922822
	ENSG00000151320	14	AKAP6	33049523	rs8017665	14	32681313	C	T	0.197813	-0.048174	0.0444687	0.278665	-0.170928	0.0145439	6.84794e-32	0.281837	0.261263	0.280699	0.556643	20	-0.230238	0.793912	1.32556	0.794344	2.21203	1.326(0.794,2.212)	0.922822
	ENSG00000051180	15	RAD51	41005663	rs8026605	15	40875584	G	A	0.397614	0.037711	0.0346116	0.275912	0.0468239	0.00807866	6.7915e-09	0.805379	0.752133	0.284262	0.933651	20	-0.668802	2.27956	2.23754	0.512322	9.77238	2.238(0.512,9.772)	0.922822
	ENSG00000125844	20	RRBP1	17628631	rs6080761	20	17629162	A	G	0.437376	0.0376958	0.0351906	0.284084	0.255327	0.00797201	4.45979e-225	0.147637	0.137903	0.284353	0.248814	20	-0.122653	0.417927	1.15909	0.884571	1.51881	1.159(0.885,1.519)	0.922822
	ENSG00000172057	17	ORMDL3	38080574	rs12936231	17	38029120	C	G	0.485089	-0.0369441	0.0346275	0.286017	0.732676	0.00680812	0	-0.0504235	0.047264	0.28604	0.258161	20	-0.143061	0.0422139	0.950827	0.866701	1.04312	0.951(0.867,1.043)	0.922822
	ENSG00000143575	1	HAX1	154246669	rs12750321	1	154251626	G	A	0.328032	0.0420912	0.0394906	0.28649	0.253023	0.00871594	2.76033e-185	0.166354	0.156181	0.286814	0.89768	20	-0.139761	0.472469	1.18099	0.869566	1.60395	1.181(0.87,1.604)	0.922822
	ENSG00000049449	11	RCN1	31980620	rs4922580	11	32143936	G	C	0.492048	-0.0365372	0.0343978	0.288147	0.155432	0.00919847	4.68586e-64	-0.235069	0.221741	0.289097	0.749919	20	-0.669681	0.199543	0.790516	0.511872	1.22085	0.791(0.512,1.221)	0.922822
	ENSG00000155657	2	TTN	179543122	rs13034990	2	179386240	G	A	0.138171	-0.0547971	0.0511608	0.284135	-0.0746427	0.0113401	4.6354e-11	0.734126	0.694424	0.290433	0.594817	20	-0.626945	2.0952	2.08366	0.534221	8.12704	2.084(0.534,8.127)	0.922822
	ENSG00000155256	10	ZFYVE27	99508771	rs4244329	10	99519753	G	A	0.16998	0.0452357	0.0427766	0.29029	-0.156871	0.00971661	1.23948e-58	-0.288363	0.273272	0.291323	0.689011	20	-0.823976	0.24725	0.749489	0.438684	1.2805	0.749(0.439,1.28)	0.922822
	ENSG00000138768	4	USO1	76692572	rs11729258	4	76647710	T	G	0.157058	-0.0572446	0.0542128	0.291003	-0.399767	0.0181887	4.59444e-107	0.143195	0.135767	0.291559	0.124223	20	-0.122908	0.409298	1.15395	0.884345	1.50576	1.154(0.884,1.506)	0.922822
	ENSG00000186868	17	MAPT	44038724	rs17698176	17	44819595	G	T	0.227634	-0.0617557	0.0581358	0.288115	0.0647023	0.00999449	9.55681e-11	-0.954458	0.910527	0.294524	0.570733	20	-2.73909	0.830175	0.385021	0.0646291	2.29372	0.385(0.065,2.294)	0.922822
	ENSG00000110092	11	CCND1	69462548	rs1960217	11	69383728	C	T	0.362823	0.0399453	0.038065	0.293996	-0.184464	0.00909432	1.8023e-91	-0.216548	0.206631	0.294641	0.276977	20	-0.621545	0.188449	0.805294	0.537114	1.20738	0.805(0.537,1.207)	0.922822
	ENSG00000100815	14	TRIP11	92469788	rs67089639	14	92526240	C	A	0.223658	0.0421664	0.0402582	0.294916	0.279395	0.00910899	1.32875e-206	0.15092	0.144175	0.295198	0.875396	20	-0.131663	0.433503	1.1629	0.876636	1.54265	1.163(0.877,1.543)	0.922822
	ENSG00000072310	17	SREBF1	17727019	rs9891957	17	17744439	G	A	0.415507	0.0365324	0.0349332	0.295663	-0.34167	0.00789454	0	-0.106923	0.102272	0.295804	0.979087	20	-0.307376	0.0935301	0.898595	0.735374	1.09804	0.899(0.735,1.098)	0.922822
	ENSG00000128590	7	DNAJB9	108212653	rs1043615	7	108212353	G	A	0.502982	-0.0360797	0.0343066	0.292944	0.0741762	0.0079416	9.61516e-21	-0.486406	0.465424	0.295986	0.699926	20	-1.39864	0.425825	0.614832	0.246933	1.53085	0.615(0.247,1.531)	0.922822
	ENSG00000167769	19	ACER1	6319896	rs1982082	19	6322442	C	T	0.393638	-0.0369291	0.0351877	0.293952	-0.105802	0.0104635	4.90757e-24	0.349039	0.334365	0.296539	0.180514	18	-0.306316	1.00439	1.4177	0.736154	2.73025	1.418(0.736,2.73)	0.922822
	ENSG00000070610	9	GBA2	35743423	rs10814274	9	35734956	T	C	0.434394	0.0361186	0.0346453	0.297168	0.44484	0.00760156	0	0.0811947	0.077895	0.297245	0.496047	20	-0.0714795	0.233869	1.08458	0.931015	1.26348	1.085(0.931,1.263)	0.922822
	ENSG00000124214	20	STAU1	47767391	rs6063371	20	47819305	A	G	0.422465	-0.0377584	0.0361761	0.296606	-0.0922929	0.00843906	7.72047e-28	0.409115	0.393751	0.298796	0.728186	20	-0.362637	1.18087	1.50548	0.695839	3.2572	1.505(0.696,3.257)	0.922822
	ENSG00000110917	12	MLEC	121132169	rs7976497	12	121135467	C	T	0.470179	0.0355972	0.0343	0.299355	-0.216797	0.0086707	5.61442e-138	-0.164196	0.158349	0.299771	0.350249	20	-0.47456	0.146168	0.848576	0.622159	1.15739	0.849(0.622,1.157)	0.922822
	ENSG00000106636	7	YKT6	44247230	rs77888691	7	44231570	G	T	0.0775348	-0.0652072	0.06208	0.293547	0.0973056	0.0157959	7.26531e-10	-0.670127	0.647198	0.300469	0.765797	4	-1.93864	0.598381	0.511644	0.1439	1.81917	0.512(0.144,1.819)	0.922822
	ENSG00000134243	1	SORT1	109896382	rs657420	1	109826136	C	T	0.466203	-0.0369914	0.0355689	0.298343	0.0828186	0.00809075	1.36491e-24	-0.446655	0.43169	0.300825	0.481093	20	-1.29277	0.399457	0.639765	0.27451	1.49102	0.64(0.275,1.491)	0.922822
	ENSG00000119688	14	ABCD4	74760942	rs9323597	14	74743911	G	A	0.50497	0.0376691	0.0360499	0.296061	0.0572624	0.00815355	2.1715e-12	0.657833	0.636485	0.301351	0.514354	15	-0.589678	1.90534	1.9306	0.554506	6.72172	1.931(0.555,6.722)	0.922822
	ENSG00000188037	7	CLCN1	143031197	rs1967618	7	143035090	T	A	0.413519	-0.0363437	0.0351619	0.301318	0.323882	0.00795112	0	-0.112213	0.108599	0.301473	0.114395	20	-0.325067	0.100641	0.893854	0.722479	1.10588	0.894(0.722,1.106)	0.922822
	ENSG00000166479	18	TMX3	66361730	rs75525414	18	66365976	A	G	0.11829	-0.0592697	0.05741	0.301888	0.423887	0.0145513	1.47559e-186	-0.139824	0.135522	0.302192	0.678499	14	-0.405447	0.125799	0.869511	0.666679	1.13405	0.87(0.667,1.134)	0.922822
	ENSG00000120742	3	SERP1	150290398	rs13072593	3	150288489	G	A	0.251491	-0.0425732	0.04123	0.301801	0.134997	0.0091961	8.68459e-49	-0.315364	0.306169	0.302994	0.627648	20	-0.915455	0.284727	0.729523	0.400334	1.3294	0.73(0.4,1.329)	0.922822
	ENSG00000204977	13	TRIM13	50582320	rs74433357	13	50526691	A	G	0.171968	0.0494051	0.0479501	0.302848	-0.197531	0.0119374	1.6772e-61	-0.250113	0.243217	0.303784	0.383737	20	-0.726818	0.226592	0.778713	0.483445	1.25432	0.779(0.483,1.254)	0.922822
	ENSG00000075826	10	SEC31B	102268013	rs3763695	10	102269206	G	A	0.190855	-0.0426246	0.0414525	0.30382	-0.624953	0.00900052	0	0.0682045	0.0663362	0.303873	0.370262	20	-0.0618145	0.198223	1.07058	0.940057	1.21923	1.071(0.94,1.219)	0.922822
	ENSG00000156113	10	KCNMA1	79017854	rs816868	10	79312114	C	T	0.488072	0.035333	0.0344229	0.304685	0.506407	0.00751141	0	0.069772	0.0679827	0.304741	0.842966	20	-0.0634741	0.203018	1.07226	0.938498	1.22509	1.072(0.938,1.225)	0.922822
	ENSG00000234745	6	HLA-B	31323307	rs2596496	6	31322782	C	G	0.310139	-0.043938	0.042813	0.30476	0.640329	0.0160476	0	-0.0686179	0.0668831	0.30492	0.558592	20	-0.199709	0.062473	0.933683	0.818969	1.06447	0.934(0.819,1.064)	0.922822
	ENSG00000073969	17	NSF	44751432	rs62074125	17	44852612	C	A	0.230616	-0.0558804	0.0545972	0.30607	-0.233548	0.00934019	5.44814e-138	0.239268	0.233969	0.306475	0.476954	20	-0.219311	0.697847	1.27032	0.803072	2.00942	1.27(0.803,2.009)	0.922822
	ENSG00000182481	17	KPNA2	66037296	rs62086903	17	66016006	C	T	0.244533	-0.050362	0.048938	0.303433	-0.078756	0.0108146	3.2793e-13	0.639469	0.627561	0.308215	0.344079	20	-0.590551	1.86949	1.89547	0.554022	6.48498	1.895(0.554,6.485)	0.922822
	ENSG00000140479	15	PCSK6	101953111	rs11639051	15	101992998	A	C	0.302187	-0.0388607	0.037721	0.30291	0.0603713	0.0087749	5.98529e-12	-0.643694	0.631783	0.308273	0.119073	18	-1.88199	0.594601	0.525348	0.152287	1.81231	0.525(0.152,1.812)	0.922822
	ENSG00000132507	17	EIF5A	7213046	rs1054378	17	7215536	T	C	0.431412	0.0362377	0.0356033	0.308764	0.287979	0.0117608	2.06212e-132	0.125834	0.123738	0.309182	0.538382	20	-0.116692	0.36836	1.13409	0.889859	1.44536	1.134(0.89,1.445)	0.922822
	ENSG00000231607	13	DLEU2	50650562	rs35335144	13	50677427	A	G	0.129225	0.0552399	0.0541284	0.307475	0.236279	0.0226113	1.4714e-25	0.233791	0.230176	0.309771	0.561744	20	-0.217354	0.684936	1.26338	0.804645	1.98364	1.263(0.805,1.984)	0.922822
	ENSG00000100883	14	SRP54	35474968	rs712311	14	35402379	G	A	0.436382	0.0354457	0.0349015	0.309824	-0.240509	0.00793735	1.11539e-201	-0.147378	0.145197	0.310096	0.16333	20	-0.431964	0.137208	0.862968	0.649233	1.14707	0.863(0.649,1.147)	0.922822
	ENSG00000034713	16	GABARAPL2	75606014	rs4888448	16	75734418	G	A	0.0407555	-0.081711	0.0805881	0.310614	-0.210836	0.0161895	9.05424e-39	0.387558	0.383388	0.312076	0.929904	20	-0.363882	1.139	1.47338	0.694973	3.12364	1.473(0.695,3.124)	0.922822
	ENSG00000025434	11	NR1H3	47280123	rs3758673	11	47278917	T	C	0.297217	-0.0382046	0.0378072	0.31225	-0.370563	0.00828558	0	0.103099	0.102052	0.312373	0.808685	20	-0.0969229	0.303121	1.1086	0.907626	1.35408	1.109(0.908,1.354)	0.922822
	ENSG00000196126	6	HLA-DRB1	32552085	rs9271520	6	32589771	G	A	0.292247	0.0560864	0.0557608	0.314493	-0.976738	0.0170738	0	-0.0574222	0.0570977	0.314568	0.182011	20	-0.169334	0.0544893	0.944195	0.844227	1.056	0.944(0.844,1.056)	0.922822
	ENSG00000119787	2	ATL2	38563224	rs17412829	2	38348037	A	C	0.0626243	0.0710085	0.0706135	0.314611	0.215833	0.015046	1.14829e-46	0.328998	0.327971	0.315797	0.135111	20	-0.313825	0.971821	1.38958	0.730647	2.64275	1.39(0.731,2.643)	0.922822
	ENSG00000059377	7	TBXAS1	139598487	rs2240395	7	139718147	G	C	0.350895	-0.036586	0.0364696	0.315769	-0.284525	0.00813432	4.81035e-268	0.128586	0.12823	0.315968	0.134573	20	-0.122745	0.379917	1.13722	0.884489	1.46216	1.137(0.884,1.462)	0.922822
	ENSG00000100823	14	APEX1	20924638	rs1760953	14	20890776	A	G	0.101392	-0.052188	0.0520001	0.315565	-0.148768	0.0133449	7.32344e-29	0.3508	0.350951	0.317518	0.88927	17	-0.337064	1.03866	1.4202	0.713863	2.82544	1.42(0.714,2.825)	0.922822
	ENSG00000204209	6	DAXX	33291690	rs1061783	6	33282628	C	T	0.493042	-0.0342991	0.0343115	0.317485	0.229233	0.0119979	2.24208e-81	-0.149625	0.149884	0.318147	0.427309	20	-0.443398	0.144148	0.861031	0.641852	1.15505	0.861(0.642,1.155)	0.922822
	ENSG00000117862	1	TXNDC12	52503823	rs6686632	1	52583611	C	T	0.0735586	0.0685364	0.068769	0.31895	-0.707527	0.0149668	0	-0.0968675	0.0972178	0.319057	0.0880495	20	-0.287414	0.0936794	0.907676	0.750201	1.09821	0.908(0.75,1.098)	0.922822
	ENSG00000151929	10	BAG3	121424106	rs196336	10	121414236	T	C	0.348907	-0.0357271	0.0359372	0.320148	-0.167484	0.00818152	3.90514e-93	0.213316	0.214824	0.320718	0.768375	20	-0.207739	0.634371	1.23778	0.812419	1.88584	1.238(0.812,1.886)	0.922822
	ENSG00000108587	17	GOSR1	28829495	rs726663	17	28845774	C	T	0.493042	-0.0349632	0.0350346	0.318298	0.0743274	0.00797812	1.2035e-20	-0.470395	0.474052	0.321059	0.846914	20	-1.39954	0.458747	0.624755	0.246711	1.58209	0.625(0.247,1.582)	0.922822
	ENSG00000124762	6	CDKN1A	36649710	rs12199346	6	36641546	A	C	0.208748	0.0397378	0.0401514	0.322321	-0.208691	0.00919676	5.39835e-114	-0.190415	0.192579	0.322781	0.85651	20	-0.56787	0.18704	0.826616	0.566731	1.20568	0.827(0.567,1.206)	0.922822
	ENSG00000180398	2	MCFD2	47149001	rs34653836	2	47150575	C	T	0.159046	0.0490013	0.049659	0.323763	-0.451657	0.0108635	0	-0.108492	0.109979	0.323899	0.68335	20	-0.324051	0.107067	0.897186	0.723213	1.11301	0.897(0.723,1.113)	0.922822
	ENSG00000174697	7	LEP	127889509	rs10274395	7	127913231	G	C	0.440358	-0.0368534	0.0372201	0.322103	0.0754821	0.00809077	1.0647e-20	-0.48824	0.495868	0.324812	0.12319	20	-1.46014	0.483661	0.613706	0.232203	1.622	0.614(0.232,1.622)	0.922822
	ENSG00000100908	14	EMC9	24609485	rs3742500	14	24611978	T	G	0.276342	-0.0420185	0.0427513	0.325676	-0.273964	0.00994356	4.1993e-167	0.153373	0.156146	0.325984	0.471784	20	-0.152673	0.459419	1.16576	0.85841	1.58315	1.166(0.858,1.583)	0.922822
	ENSG00000104936	19	DMPK	46279392	rs7246377	19	46292259	A	G	0.466203	0.0334764	0.0341382	0.326784	0.281675	0.00778892	2.27425e-286	0.118847	0.121242	0.326962	0.984033	20	-0.118787	0.356481	1.1262	0.887997	1.42829	1.126(0.888,1.428)	0.922822
	ENSG00000148400	9	NOTCH1	139414605	rs10870084	9	139458533	C	T	0.0705765	-0.0696743	0.0712525	0.328148	-0.323446	0.0175673	1.05647e-75	0.215413	0.220602	0.32883	0.563612	20	-0.216967	0.647793	1.24037	0.804957	1.91132	1.24(0.805,1.911)	0.922822
	ENSG00000169252	5	ADRB2	148207176	rs2082395	5	148200600	A	G	0.414513	-0.0342051	0.0349785	0.32813	0.126274	0.00801464	6.30591e-56	-0.27088	0.277538	0.32906	0.868433	9	-0.814854	0.273094	0.762708	0.442704	1.31402	0.763(0.443,1.314)	0.922822
	ENSG00000168818	4	STX18	4480771	rs4689174	4	4579042	A	G	0.296223	-0.0370597	0.037613	0.324481	0.0621892	0.00875386	1.2102e-12	-0.59592	0.610605	0.329089	0.956151	5	-1.79271	0.600866	0.551055	0.166509	1.8237	0.551(0.167,1.824)	0.922822
	ENSG00000198431	12	TXNRD1	104676809	rs11111979	12	104680782	C	G	0.482107	0.0338237	0.0347503	0.330386	0.210868	0.00790594	9.92039e-157	0.160402	0.164906	0.330708	0.801901	20	-0.162814	0.483618	1.17398	0.849749	1.62193	1.174(0.85,1.622)	0.922822
	ENSG00000239264	6	TXNDC5	7954064	rs72820104	6	8057530	A	G	0.157058	-0.0457915	0.0467647	0.327487	0.078629	0.0122513	1.3808e-10	-0.582375	0.601634	0.333051	0.959241	20	-1.76158	0.596828	0.55857	0.171774	1.81635	0.559(0.172,1.816)	0.922822
	ENSG00000134324	2	LPIN1	11892628	rs3795974	2	11924950	T	C	0.403579	-0.0350154	0.0361711	0.33302	-0.580197	0.00748682	0	0.0603509	0.0623478	0.333058	0.712719	20	-0.0618508	0.182553	1.06221	0.940023	1.20028	1.062(0.94,1.2)	0.922822
	ENSG00000162772	1	ATF3	212766397	rs3795837	1	212773328	C	A	0.11332	-0.0579294	0.0599576	0.333958	0.152203	0.0126526	2.4896e-33	-0.380605	0.395199	0.335512	0.707484	20	-1.1552	0.393985	0.683448	0.314996	1.48288	0.683(0.315,1.483)	0.922822
	ENSG00000119537	18	KDSR	61014851	rs402348	18	61034420	G	T	0.208748	0.0429988	0.0449391	0.338657	0.438035	0.00996689	0	0.0981629	0.102617	0.338771	0.95073	20	-0.102966	0.299292	1.10314	0.902157	1.3489	1.103(0.902,1.349)	0.922822
	ENSG00000012048	17	BRCA1	41259301	rs34766339	17	41394798	T	C	0.358847	-0.0369494	0.0386399	0.338946	0.266028	0.0092019	8.91366e-184	-0.138893	0.145327	0.33921	0.735448	20	-0.423734	0.145948	0.870321	0.654598	1.15714	0.87(0.655,1.157)	0.922822
	ENSG00000092108	14	SCFD1	31148168	rs7144204	14	31171830	T	C	0.364811	-0.0353204	0.0370367	0.340256	-0.327053	0.00845198	0	0.107996	0.113278	0.340402	0.655943	20	-0.114029	0.330021	1.11404	0.892232	1.391	1.114(0.892,1.391)	0.922822
	ENSG00000147955	9	SIGMAR1	34636262	rs75842242	9	34587241	A	C	0.0606362	0.0689117	0.0723656	0.340959	-0.458511	0.0158119	7.01352e-185	-0.150295	0.157913	0.34122	0.756837	13	-0.459804	0.159214	0.860454	0.631407	1.17259	0.86(0.631,1.173)	0.922822
	ENSG00000105851	7	PIK3CG	106526656	rs42175	7	106488048	A	G	0.428429	-0.0337608	0.0354984	0.341578	0.10421	0.00806691	3.55356e-38	-0.323969	0.341565	0.342883	0.854459	20	-0.993436	0.345498	0.723273	0.370302	1.41269	0.723(0.37,1.413)	0.922822
	ENSG00000073578	5	SDHA	237585	rs35947614	5	224397	G	A	0.143141	0.0515764	0.0544879	0.34386	0.177101	0.0125346	2.5169e-45	0.291226	0.308355	0.34494	0.986928	20	-0.31315	0.895602	1.33807	0.73114	2.44881	1.338(0.731,2.449)	0.922822
	ENSG00000105669	19	COPE	19020264	rs4808873	19	19011774	G	C	0.343936	0.0348641	0.036958	0.345505	-0.201611	0.0123495	6.51131e-60	-0.172928	0.183619	0.346309	0.0704667	20	-0.532821	0.186965	0.841198	0.586947	1.20559	0.841(0.587,1.206)	0.922822
	ENSG00000090520	3	DNAJB11	186300126	rs3846211	3	186306541	T	C	0.314115	0.0349449	0.0369436	0.3442	0.0717103	0.00856427	5.60737e-17	0.487307	0.518455	0.347258	0.522881	20	-0.528865	1.50348	1.62793	0.589274	4.49731	1.628(0.589,4.497)	0.922822
	ENSG00000145675	5	PIK3R1	67554598	rs4976156	5	67570613	G	A	0.208748	-0.0413598	0.0440312	0.347561	0.150184	0.00966795	2.036e-54	-0.275394	0.293717	0.348441	0.208067	20	-0.851079	0.300291	0.759273	0.426954	1.35025	0.759(0.427,1.35)	0.922822
	ENSG00000090054	9	SPTLC1	94835973	rs7029539	9	94864322	G	A	0.158052	-0.0448324	0.0475492	0.345751	0.0863181	0.0108911	2.2705e-15	-0.519386	0.554744	0.349138	0.0739367	20	-1.60668	0.567912	0.594886	0.200551	1.76458	0.595(0.201,1.765)	0.922822
	ENSG00000158092	3	NCK1	136624857	rs80201571	3	136659779	T	G	0.237575	-0.0418705	0.0446324	0.348183	-0.12486	0.00982449	5.27041e-37	0.335341	0.358433	0.349493	0.74106	20	-0.367188	1.03787	1.39842	0.69268	2.8232	1.398(0.693,2.823)	0.922822
	ENSG00000126581	17	BECN1	40973759	rs1011157	17	40960253	T	C	0.110338	0.0605473	0.0648254	0.350301	0.460707	0.0123421	5.72571e-305	0.131423	0.140753	0.350452	0.348765	20	-0.144453	0.407299	1.14045	0.865496	1.50275	1.14(0.865,1.503)	0.922822
	ENSG00000140941	16	MAP1LC3B	87427993	rs62053114	16	87423600	C	G	0.459245	0.0333409	0.0357785	0.351403	-0.380844	0.0114225	9.67474e-244	-0.0875447	0.0939817	0.351591	0.291953	20	-0.271749	0.0966594	0.916178	0.762046	1.10149	0.916(0.762,1.101)	0.922822
	ENSG00000170606	5	HSPA4	132414897	rs72801474	5	132444128	A	G	0.0685885	-0.0669456	0.0720428	0.352761	-0.523833	0.0148771	1.37634e-271	0.1278	0.137578	0.352928	0.618236	18	-0.141853	0.397453	1.13633	0.867749	1.48803	1.136(0.868,1.488)	0.922822
	ENSG00000136240	7	KDELR2	6504728	rs6796	7	6502367	C	T	0.246521	0.0386702	0.041628	0.352918	-0.767693	0.00809189	0	-0.0503719	0.0542275	0.352941	0.949917	20	-0.156658	0.055914	0.950876	0.854997	1.05751	0.951(0.855,1.058)	0.922822
	ENSG00000105499	19	PLA2G4C	48582587	rs434371	19	48611620	C	T	0.465209	0.0350648	0.0378796	0.354607	-0.644936	0.00746312	0	-0.0543695	0.0587373	0.354634	0.0143577	20	-0.169495	0.0607556	0.947082	0.844091	1.06264	0.947(0.844,1.063)	0.922822
	ENSG00000107566	10	ERLIN1	101928971	rs12255081	10	101918448	T	C	0.0487078	-0.0922465	0.0996721	0.354706	-0.267014	0.0206099	2.18418e-38	0.345474	0.374235	0.35593	0.00504886	7	-0.388027	1.07897	1.41266	0.678394	2.94166	1.413(0.678,2.942)	0.922822
	ENSG00000070882	7	OSBPL3	24928705	rs34105255	7	25070716	T	C	0.375746	-0.0349926	0.0379683	0.356723	-0.285135	0.00824118	2.63333e-262	0.122723	0.133206	0.356894	0.0959897	20	-0.138361	0.383807	1.13057	0.870784	1.46786	1.131(0.871,1.468)	0.922822
	ENSG00000135924	2	DNAJB2	220147805	rs6730612	2	220146196	T	G	0.167992	0.0436296	0.0472817	0.356133	0.148696	0.0109475	5.0791e-42	0.293415	0.318709	0.35724	0.69995	20	-0.331255	0.918085	1.341	0.718022	2.50449	1.341(0.718,2.504)	0.922822
	ENSG00000198925	2	ATG9A	220084466	rs908197	2	220144410	C	G	0.167992	0.0436371	0.047324	0.35648	0.179174	0.0111649	5.90355e-58	0.243546	0.264558	0.357272	0.654117	20	-0.274988	0.76208	1.27577	0.759581	2.14273	1.276(0.76,2.143)	0.922822
	ENSG00000055332	2	EIF2AK2	37355280	rs1127906	2	37327244	A	G	0.210736	-0.0397327	0.0431672	0.357344	-0.208553	0.00951669	1.89371e-106	0.190516	0.207167	0.357768	0.217726	20	-0.215531	0.596563	1.20987	0.806113	1.81587	1.21(0.806,1.816)	0.922822
	ENSG00000048828	9	FAM120A	96271285	rs564	9	96328303	C	T	0.366799	0.0336328	0.0364959	0.356763	-0.0892111	0.00850326	9.46159e-26	-0.377003	0.410671	0.358611	0.504194	20	-1.18192	0.427912	0.685914	0.30669	1.53405	0.686(0.307,1.534)	0.922822
	ENSG00000232810	6	TNF	31544728	rs1121800	6	31535074	A	T	0.404573	-0.0316397	0.0345147	0.359298	0.297085	0.0121342	2.23063e-132	-0.106501	0.116259	0.359634	0.0643944	20	-0.334369	0.121367	0.898974	0.71579	1.12904	0.899(0.716,1.129)	0.922822
	ENSG00000078124	11	ACER3	76654876	rs11237036	11	76675524	T	C	0.259443	0.0398312	0.043514	0.360001	0.64812	0.00960241	0	0.0614564	0.067145	0.360045	0.647838	20	-0.0701478	0.193061	1.06338	0.932256	1.21296	1.063(0.932,1.213)	0.922822
	ENSG00000180228	2	PRKRA	179306190	rs4894019	2	179284663	G	A	0.210736	-0.0393217	0.0428903	0.359249	0.126191	0.00971225	1.3407e-38	-0.311604	0.340729	0.360442	0.86719	20	-0.979433	0.356225	0.732271	0.375524	1.42793	0.732(0.376,1.428)	0.922822
	ENSG00000160691	1	SHC1	154940822	rs11264294	1	154979561	C	T	0.0596421	-0.0662926	0.072437	0.360099	0.367862	0.0168753	2.38181e-105	-0.180211	0.197087	0.360522	0.561321	9	-0.566502	0.20608	0.835094	0.567507	1.22885	0.835(0.568,1.229)	0.922822
	ENSG00000136848	9	DAB2IP	124438572	rs10760190	9	124597993	A	G	0.398608	0.034129	0.03704	0.356837	-0.046939	0.00817069	9.20299e-09	-0.727093	0.799196	0.362938	0.769962	20	-2.29352	0.839331	0.483312	0.100911	2.31482	0.483(0.101,2.315)	0.922822
	ENSG00000159363	1	ATP13A2	17325438	rs4920605	1	17315425	G	A	0.452286	0.0315792	0.0347666	0.36371	-0.162975	0.00796335	4.3628e-93	-0.193767	0.213535	0.364182	0.626178	20	-0.612296	0.224762	0.82385	0.542105	1.25202	0.824(0.542,1.252)	0.922822
	ENSG00000172765	3	TMCC1	129489527	rs112272442	3	129618852	C	T	0.082505	-0.0588023	0.0649851	0.36554	-0.198427	0.0148858	1.54901e-40	0.296342	0.328255	0.366642	0.125095	20	-0.347038	0.939722	1.34493	0.706779	2.55927	1.345(0.707,2.559)	0.922822
	ENSG00000010270	7	STARD3NL	38244048	rs9638935	7	38220959	C	A	0.222664	-0.0363068	0.0401886	0.366308	-0.214369	0.00929234	9.39609e-118	0.169366	0.187618	0.366676	0.981958	20	-0.198365	0.537097	1.18455	0.82007	1.71103	1.185(0.82,1.711)	0.922822
	ENSG00000105974	7	CAV1	116183036	rs1997276	7	115978317	T	A	0.173956	-0.0406968	0.0451223	0.367099	0.0920863	0.0104073	8.89419e-19	-0.441942	0.49254	0.369574	0.877603	20	-1.40732	0.523436	0.642787	0.244798	1.68782	0.643(0.245,1.688)	0.922822
	ENSG00000058272	12	PPP1R12A	80248291	rs1919585	12	80365623	A	G	0.136183	0.05309	0.0589174	0.36754	-0.100161	0.0124683	9.49633e-16	-0.530048	0.591919	0.370533	0.815032	20	-1.69021	0.630113	0.588577	0.184481	1.87782	0.589(0.184,1.878)	0.922822
	ENSG00000145335	4	SNCA	90702358	rs2245801	4	90757840	T	C	0.198807	0.0387892	0.0433512	0.370912	0.272547	0.0100245	8.95565e-163	0.142321	0.159145	0.371171	0.158888	20	-0.169603	0.454245	1.15295	0.844	1.57498	1.153(0.844,1.575)	0.922822
	ENSG00000121691	11	CAT	34477040	rs11032695	11	34447586	G	T	0.349901	0.0320707	0.0359366	0.372166	0.681117	0.0074574	0	0.0470855	0.0527638	0.372188	0.521144	20	-0.0563315	0.150503	1.04821	0.945226	1.16242	1.048(0.945,1.162)	0.922822
	ENSG00000087074	19	PPP1R15A	49377481	rs595474	19	49378328	T	C	0.110338	-0.0494586	0.0554	0.371988	-0.36504	0.0126701	1.5529e-182	0.135488	0.151837	0.372218	0.812547	20	-0.162113	0.433089	1.1451	0.850346	1.54201	1.145(0.85,1.542)	0.922822
	ENSG00000002330	11	BAD	64044739	rs947939	11	63885287	T	C	0.139165	-0.0444566	0.0495674	0.369777	0.0907893	0.0111022	2.89549e-16	-0.489668	0.549235	0.372637	0.341449	20	-1.56617	0.586833	0.61283	0.208844	1.79828	0.613(0.209,1.798)	0.922822
	ENSG00000239857	7	GET4	926131	rs6960062	7	884665	G	A	0.335984	-0.0325394	0.0366405	0.374503	-0.237696	0.00894331	1.21614e-155	0.136895	0.154235	0.374769	0.848975	20	-0.165406	0.439196	1.14671	0.84755	1.55146	1.147(0.848,1.551)	0.922822
	ENSG00000126775	14	ATG14	55855843	rs17742886	14	55861890	A	G	0.154076	0.0424691	0.0476499	0.372782	0.105852	0.0111619	2.4613e-21	0.401211	0.452138	0.374883	0.219146	20	-0.484979	1.2874	1.49363	0.61571	3.62336	1.494(0.616,3.623)	0.922822
	ENSG00000113719	5	ERGIC1	172320483	rs572041	5	172376903	T	C	0.480119	-0.0311982	0.0351143	0.374286	-0.110059	0.00856653	8.87198e-38	0.283467	0.319811	0.375425	0.397827	20	-0.343363	0.910297	1.32773	0.709381	2.48506	1.328(0.709,2.485)	0.922822
	ENSG00000113161	5	HMGCR	74645041	rs6453133	5	74692776	G	A	0.289264	-0.0333112	0.0377066	0.377003	0.127763	0.00853654	1.2137e-50	-0.260727	0.295643	0.377833	0.646086	20	-0.840187	0.318733	0.770491	0.43163	1.37538	0.77(0.432,1.375)	0.922822
	ENSG00000112096	6	SOD2	160141828	rs78550031	6	160149179	C	T	0.0596421	-0.070776	0.0802635	0.377887	0.992312	0.018108	0	-0.0713243	0.0808958	0.377949	0.0879804	20	-0.22988	0.0872315	0.93116	0.794629	1.09115	0.931(0.795,1.091)	0.922822
	ENSG00000138942	22	RNF185	31579583	rs71324184	22	31752061	G	C	0.291252	-0.0335081	0.0380492	0.378506	0.568777	0.0133793	0	-0.0589125	0.0669108	0.378608	0.970722	20	-0.190058	0.0722327	0.942789	0.826911	1.07491	0.943(0.827,1.075)	0.922822
	ENSG00000096433	6	ITPR3	33626436	rs9469532	6	33601132	A	G	0.342942	-0.0323841	0.0369657	0.380999	-0.474528	0.00789113	0	0.0682449	0.0779083	0.381049	0.712309	20	-0.0844554	0.220945	1.07063	0.919013	1.24726	1.071(0.919,1.247)	0.922822
	ENSG00000116688	1	MFN2	12056904	rs873458	1	12046089	G	A	0.473161	0.0306199	0.0349854	0.381454	0.879647	0.00624334	0	0.0348093	0.0397728	0.381463	0.880857	20	-0.0431454	0.112764	1.03542	0.957772	1.11937	1.035(0.958,1.119)	0.922822
	ENSG00000150961	4	SEC24D	119701908	rs11737400	4	120279335	G	A	0.422465	0.0341734	0.038899	0.379663	0.0668877	0.00804538	9.2685e-17	0.510907	0.584794	0.382308	0.728814	16	-0.635289	1.6571	1.6668	0.529782	5.2441	1.667(0.53,5.244)	0.922822
	ENSG00000204388	6	HSPA1B	31796771	rs1144708	6	31710020	T	C	0.361829	-0.0315397	0.0360868	0.38212	-0.216337	0.0123991	3.57749e-68	0.14579	0.167018	0.382717	0.0141175	20	-0.181565	0.473145	1.15695	0.833964	1.60503	1.157(0.834,1.605)	0.922822
	ENSG00000204308	6	RNF5	32149030	rs3115672	6	31727897	T	C	0.0745527	-0.0527283	0.0601941	0.381046	-0.323466	0.0333594	3.1232e-22	0.16301	0.186849	0.38298	0.164919	20	-0.203214	0.529234	1.17705	0.816104	1.69763	1.177(0.816,1.698)	0.922822
	ENSG00000204435	6	CSNK2B	31635566	rs1144708	6	31710020	T	C	0.361829	-0.0315397	0.0360868	0.38212	0.177755	0.0124444	2.75327e-46	-0.177433	0.203393	0.383009	0.348272	20	-0.576083	0.221217	0.837417	0.562096	1.24759	0.837(0.562,1.248)	0.922822
	ENSG00000050748	5	MAPK9	179689621	rs6601106	5	179706247	T	C	0.410537	-0.0306228	0.0351009	0.382978	0.266875	0.00803629	8.06228e-242	-0.114746	0.131571	0.383142	0.47224	20	-0.372625	0.143133	0.891593	0.688923	1.15388	0.892(0.689,1.154)	0.922822
	ENSG00000065559	17	MAP2K4	11985644	rs12451415	17	12006780	A	G	0.219682	0.0369331	0.0422528	0.382065	0.151133	0.0143497	6.13829e-26	0.244374	0.280534	0.383698	0.369245	20	-0.305473	0.794221	1.27682	0.736775	2.21272	1.277(0.737,2.213)	0.922822
	ENSG00000107175	9	CREB3	35734666	rs1570249	9	35752252	A	G	0.4334	0.0302078	0.0345694	0.382211	-0.072643	0.00799294	1.00511e-19	-0.415839	0.478076	0.3844	0.552927	20	-1.35287	0.52119	0.659786	0.258498	1.68403	0.66(0.258,1.684)	0.922822
	ENSG00000110697	11	PITPNM1	67266486	rs55969935	11	66646365	T	C	0.0795229	-0.063414	0.0728782	0.384226	-0.11949	0.0147312	5.00399e-16	0.530703	0.613407	0.386944	0.432133	20	-0.671575	1.73298	1.70013	0.510903	5.65749	1.7(0.511,5.657)	0.922822
	ENSG00000117906	15	RCN2	77233280	rs15939	15	77241542	C	T	0.127237	-0.0454531	0.0524748	0.386386	-0.120968	0.0125634	6.0549e-22	0.375746	0.435543	0.388299	0.693882	20	-0.477918	1.22941	1.45608	0.620073	3.41921	1.456(0.62,3.419)	0.922822
	ENSG00000213676	6	ATF6B	32080991	rs3117577	6	31727474	G	A	0.0745527	-0.0519633	0.0602432	0.38838	0.446987	0.0302738	2.47053e-49	-0.116252	0.135006	0.389188	0.401978	20	-0.380864	0.14836	0.890251	0.683271	1.15993	0.89(0.683,1.16)	0.922822
	ENSG00000116729	1	WLS	68631472	rs59129922	1	68737383	A	C	0.159046	-0.0418608	0.0487755	0.390763	0.769124	0.00970531	0	-0.0544266	0.0634207	0.390791	0.586001	20	-0.178731	0.069878	0.947028	0.836331	1.07238	0.947(0.836,1.072)	0.922822
	ENSG00000070756	8	PABPC1	101716540	rs2173214	8	101821313	C	T	0.146123	0.0436173	0.0506962	0.389587	0.285012	0.0251911	1.1187e-29	0.153037	0.178387	0.390953	0.615051	8	-0.196602	0.502676	1.16537	0.821518	1.65314	1.165(0.822,1.653)	0.922822
	ENSG00000121940	1	CLCC1	109489120	rs17565099	1	109476273	C	T	0.05666	-0.0566998	0.0664975	0.393848	-0.14883	0.0162252	4.6089e-20	0.380969	0.448727	0.395881	0.642027	20	-0.498536	1.26047	1.4637	0.607419	3.52709	1.464(0.607,3.527)	0.922822
	ENSG00000163082	2	SGPP2	223357451	rs724150	2	223271022	C	T	0.432406	-0.0299526	0.0350372	0.392619	0.0526336	0.00806225	6.64762e-11	-0.569077	0.671365	0.396638	0.459781	20	-1.88495	0.746798	0.566048	0.151836	2.11023	0.566(0.152,2.11)	0.922822
	ENSG00000092529	15	CAPN3	42672408	rs117881887	15	42817780	A	G	0.0656064	-0.0961288	0.113237	0.395926	0.286248	0.0214479	1.2465e-40	-0.335823	0.396389	0.39688	0.783149	14	-1.11275	0.441099	0.71475	0.328655	1.55442	0.715(0.329,1.554)	0.922822
	ENSG00000182372	8	CLN8	1719341	rs9022	8	1710977	A	C	0.311133	-0.0332824	0.0393111	0.397195	-0.268362	0.00894618	1.061e-197	0.12402	0.146544	0.397383	0.145369	20	-0.163206	0.411246	1.13204	0.849416	1.5087	1.132(0.849,1.509)	0.922822
	ENSG00000179364	14	PACS2	105815692	rs4555082	14	105758964	T	C	0.319085	0.0328796	0.0386619	0.395081	0.0709172	0.00874916	5.24859e-16	0.463634	0.548162	0.397666	0.873262	10	-0.610764	1.53803	1.58984	0.542936	4.65542	1.59(0.543,4.655)	0.922822
	ENSG00000114850	3	SSR3	156265451	rs9830714	3	156248426	T	C	0.243539	0.0347187	0.041056	0.397752	0.126479	0.0094379	5.94931e-41	0.274501	0.325253	0.398689	0.229344	20	-0.362995	0.911997	1.31587	0.69559	2.48929	1.316(0.696,2.489)	0.922822
	ENSG00000185591	12	SP1	53792095	rs10876447	12	53770941	A	G	0.150099	0.0412773	0.0488932	0.398539	0.404069	0.0160705	1.66038e-139	0.102154	0.12107	0.398805	0.9404	20	-0.135143	0.339451	1.10755	0.873591	1.40418	1.108(0.874,1.404)	0.922822
	ENSG00000101255	20	TRIB3	369732	rs6051550	20	357570	C	T	0.45328	0.0300518	0.0356486	0.399228	0.422221	0.00764941	0	0.0711755	0.084441	0.399283	0.861367	20	-0.0943289	0.23668	1.07377	0.909983	1.26704	1.074(0.91,1.267)	0.922822
	ENSG00000017260	3	ATP2C1	130652497	rs2669858	3	130665531	G	A	0.195825	0.0385196	0.0456304	0.398577	0.158862	0.0103357	2.59373e-53	0.242472	0.287666	0.399287	0.700595	20	-0.321353	0.806297	1.2744	0.725167	2.2396	1.274(0.725,2.24)	0.922822
	ENSG00000178607	17	ERN1	62163928	rs16947438	17	62146498	T	G	0.140159	-0.0400287	0.0476203	0.400583	-0.412751	0.0108056	0	0.0969803	0.115401	0.400697	0.891006	20	-0.129206	0.323166	1.10184	0.878793	1.3815	1.102(0.879,1.381)	0.922822
	ENSG00000096696	6	DSP	7564379	rs11243180	6	7439070	G	A	0.423459	-0.0305251	0.0364294	0.402074	-0.641702	0.00716339	0	0.047569	0.0567726	0.402095	0.614423	20	-0.0637053	0.158843	1.04872	0.938281	1.17215	1.049(0.938,1.172)	0.922822
	ENSG00000131979	14	GCH1	55339148	rs8003903	14	55357771	T	C	0.082505	0.0466376	0.0557362	0.40273	-0.481874	0.0122779	0	-0.0967839	0.115692	0.402836	0.678896	20	-0.32354	0.129972	0.907752	0.723583	1.1388	0.908(0.724,1.139)	0.922822
	ENSG00000129625	5	REEP5	112235160	rs466443	5	112229169	T	C	0.405567	0.031763	0.0380569	0.403933	-0.27767	0.00863342	5.96426e-227	-0.114391	0.137104	0.404091	0.196019	20	-0.383115	0.154333	0.891909	0.681735	1.16688	0.892(0.682,1.167)	0.922822
	ENSG00000132383	17	RPA1	1768186	rs17734	17	1801144	C	T	0.377734	0.0294933	0.0354331	0.405202	-0.510437	0.00756433	0	-0.0577805	0.0694223	0.405237	0.537796	20	-0.193848	0.0782872	0.943857	0.823783	1.08143	0.944(0.824,1.081)	0.922822
	ENSG00000151914	6	DST	56571105	rs6899968	6	56235826	C	A	0.351889	-0.0310874	0.0372781	0.404319	0.108322	0.0086476	5.36732e-36	-0.286992	0.344904	0.405357	0.288019	20	-0.963004	0.38902	0.750518	0.381744	1.47553	0.751(0.382,1.476)	0.922822
	ENSG00000225783	22	MIAT	27057415	rs9625066	22	27068702	A	C	0.26839	-0.033212	0.0400056	0.406435	0.67544	0.00977789	0	-0.0491708	0.0592331	0.406469	0.382456	20	-0.165268	0.0669261	0.952019	0.847667	1.06922	0.952(0.848,1.069)	0.922822
	ENSG00000172939	3	OXSR1	38251779	rs272576	3	38258179	T	C	0.0626243	0.0578858	0.0699197	0.407733	0.193254	0.0171094	1.38591e-29	0.299533	0.362773	0.408989	0.985617	11	-0.411502	1.01057	1.34923	0.662654	2.74716	1.349(0.663,2.747)	0.922822
	ENSG00000116711	1	PLA2G4A	186878099	rs12072973	1	186952333	G	A	0.54175	-0.0289812	0.0350707	0.408597	0.147062	0.00794416	1.65248e-76	-0.197068	0.238713	0.409063	0.664578	20	-0.664945	0.270809	0.821135	0.514302	1.31103	0.821(0.514,1.311)	0.922822
	ENSG00000163902	3	RPN1	128369367	rs34198449	3	128381270	A	G	0.251491	-0.0340564	0.0412658	0.409205	0.245979	0.00971067	1.46289e-141	-0.138453	0.167851	0.409454	0.220544	20	-0.467441	0.190535	0.870704	0.626604	1.2099	0.871(0.627,1.21)	0.922822
	ENSG00000160803	1	UBQLN4	156014338	rs7517202	1	156004672	T	C	0.397614	-0.0293475	0.0358359	0.41282	0.401451	0.0172237	3.67795e-120	-0.0731036	0.089321	0.413108	0.487245	20	-0.248173	0.101966	0.929505	0.780225	1.10735	0.93(0.78,1.107)	0.922822
	ENSG00000169223	5	LMAN2	176768708	rs4976645	5	176777493	A	G	0.343936	0.0307201	0.0375063	0.412749	0.119829	0.008653	1.30439e-43	0.256367	0.313547	0.413565	0.568036	20	-0.358185	0.870919	1.29223	0.698944	2.38911	1.292(0.699,2.389)	0.922822
	ENSG00000245573	11	BDNF-AS	27624053	rs3763965	11	27528987	A	T	0.450298	-0.0292492	0.0355446	0.410573	-0.0725176	0.0107923	1.8247e-11	0.403338	0.493813	0.414052	0.365597	20	-0.564535	1.37121	1.49681	0.568624	3.94012	1.497(0.569,3.94)	0.922822
	ENSG00000151623	4	NR3C2	149182881	rs6817545	4	148977389	T	C	0.429423	-0.0290298	0.0354294	0.412575	-0.0765647	0.00815629	6.16159e-21	0.379154	0.464497	0.414347	0.453542	20	-0.53126	1.28957	1.46105	0.587864	3.63122	1.461(0.588,3.631)	0.922822
	ENSG00000138757	4	G3BP2	76608837	rs1512740	4	76590015	C	T	0.375746	0.028709	0.0353359	0.416528	-0.456679	0.00784979	0	-0.0628648	0.0773834	0.416573	0.511993	20	-0.214536	0.0888067	0.93907	0.806916	1.09287	0.939(0.807,1.093)	0.922822
	ENSG00000072274	3	TFRC	195781557	rs28429906	3	195906747	G	A	0.224652	0.0357326	0.0440358	0.417111	-0.339796	0.0105513	1.54138e-227	-0.105159	0.129636	0.417259	0.808458	20	-0.359246	0.148928	0.900181	0.698203	1.16059	0.9(0.698,1.161)	0.922822
	ENSG00000164342	4	TLR3	186998280	rs7663027	4	187112629	C	G	0.370775	0.0324396	0.0403288	0.421178	-0.142497	0.00836424	4.41065e-65	-0.227652	0.283331	0.421695	0.770778	20	-0.782981	0.327677	0.796401	0.457042	1.38774	0.796(0.457,1.388)	0.922822
	ENSG00000134086	3	VHL	10188298	rs780278	3	10205253	T	C	0.126243	0.0439786	0.0547219	0.421585	0.194009	0.0126514	4.46268e-53	0.226683	0.282445	0.422222	0.202963	18	-0.326909	0.780275	1.25443	0.721149	2.18207	1.254(0.721,2.182)	0.922822
	ENSG00000089597	11	GANAB	62403201	rs118093058	11	62413673	T	G	0.161034	0.0425377	0.0529461	0.421735	-0.28793	0.0178885	2.73018e-58	-0.147736	0.184114	0.422312	0.547305	20	-0.508599	0.213127	0.862659	0.601337	1.23754	0.863(0.601,1.238)	0.922822
	ENSG00000125845	20	BMP2	6754619	rs6140415	20	7744251	A	G	0.154076	-0.037368	0.0465637	0.422256	0.260354	0.0110159	1.70797e-123	-0.143528	0.178951	0.422523	0.628994	7	-0.494272	0.207216	0.866297	0.610015	1.23025	0.866(0.61,1.23)	0.922822
	ENSG00000088298	20	EDEM2	33784544	rs7353271	20	33727431	T	C	0.188867	0.0366416	0.0457453	0.423137	-0.397893	0.0100386	0	-0.092089	0.114992	0.423232	0.167234	20	-0.317473	0.133295	0.912024	0.727986	1.14259	0.912(0.728,1.143)	0.922822
	ENSG00000196531	12	NACA	57115812	rs4788	12	57106660	A	T	0.26839	0.0328604	0.0408583	0.421251	0.141648	0.0170311	9.02177e-17	0.231987	0.289795	0.42341	0.338143	20	-0.336011	0.799985	1.2611	0.714615	2.22551	1.261(0.715,2.226)	0.922822
	ENSG00000135506	12	OS9	58101539	rs1689596	12	58053029	T	C	0.333996	-0.0288989	0.0361704	0.424311	-0.0823396	0.00832436	4.53638e-23	0.350972	0.440714	0.425817	0.638715	20	-0.512827	1.21477	1.42045	0.5988	3.36952	1.42(0.599,3.37)	0.922822
	ENSG00000118402	6	ELOVL4	80640913	rs239511	6	80693816	A	G	0.43837	0.0282156	0.0356395	0.428539	0.230991	0.00788909	1.87541e-188	0.12215	0.154346	0.428708	0.182918	20	-0.180368	0.424668	1.12992	0.834963	1.52908	1.13(0.835,1.529)	0.922822
	ENSG00000080824	14	HSP90AA1	102576555	rs2403017	14	102542469	G	A	0.16004	-0.0365281	0.0461481	0.428629	-0.276933	0.0110291	3.94636e-139	0.131902	0.166723	0.428858	0.765743	20	-0.194875	0.458679	1.141	0.822937	1.58198	1.141(0.823,1.582)	0.922822
	ENSG00000164081	3	TEX264	51717524	rs113649916	3	50731206	A	G	0.109344	0.0402538	0.0510081	0.430015	0.317052	0.0222633	5.09924e-46	0.126963	0.161129	0.430722	0.657614	7	-0.18885	0.442776	1.13538	0.827911	1.55702	1.135(0.828,1.557)	0.922822
	ENSG00000079332	10	SAR1A	71920119	rs9971029	10	71916461	A	G	0.441352	0.0277103	0.0351707	0.430767	0.25684	0.00796614	4.6435e-228	0.107889	0.136977	0.430904	0.0664167	20	-0.160586	0.376364	1.11392	0.851645	1.45698	1.114(0.852,1.457)	0.922822
	ENSG00000164111	4	ANXA5	122603689	rs28454132	4	122613459	A	C	0.180915	-0.0337799	0.0429423	0.431496	0.81509	0.00908192	0	-0.0414431	0.0526861	0.431514	0.688359	20	-0.144708	0.0618217	0.959404	0.865275	1.06377	0.959(0.865,1.064)	0.922822
	ENSG00000136244	7	IL6	22768562	rs10265117	7	22701636	A	G	0.10338	0.0450201	0.0570423	0.429971	-0.117163	0.0123228	1.94739e-21	-0.384253	0.488539	0.431554	0.658299	20	-1.34179	0.573283	0.680959	0.261378	1.77408	0.681(0.261,1.774)	0.922822
	ENSG00000233276	3	GPX1	49395321	rs11130203	3	49575367	A	G	0.333002	-0.0295918	0.0375559	0.430731	-0.111313	0.00901232	4.79898e-35	0.265844	0.338076	0.431666	0.167761	20	-0.396785	0.928473	1.30453	0.672479	2.53064	1.305(0.672,2.531)	0.922822
	ENSG00000164031	4	DNAJB14	100842644	rs72684392	4	100873839	G	C	0.11829	0.0530051	0.0670246	0.429043	0.0990457	0.0144901	8.1777e-12	0.535158	0.681217	0.432107	0.219869	20	-0.800027	1.87034	1.70772	0.449317	6.49052	1.708(0.449,6.491)	0.922822
	ENSG00000145354	4	CISD2	103800267	rs6822658	4	103813121	G	T	0.492048	-0.0278135	0.0354621	0.432854	-0.193889	0.00840571	1.00701e-117	0.143451	0.183004	0.43312	0.514896	20	-0.215237	0.502139	1.15425	0.80635	1.65225	1.154(0.806,1.652)	0.922822
	ENSG00000125629	2	INSIG2	118857300	rs12986752	2	118845819	A	G	0.239563	0.030686	0.0391565	0.43323	-0.189777	0.00908982	8.4873e-97	-0.161695	0.206474	0.433554	0.695902	20	-0.566384	0.242994	0.850701	0.567574	1.27506	0.851(0.568,1.275)	0.922822
	ENSG00000121073	17	SLC35B1	47782340	rs75764946	17	47782865	T	G	0.0954274	0.0539467	0.068653	0.431992	0.106681	0.0149493	9.5946e-13	0.505683	0.647426	0.434764	0.229464	20	-0.763272	1.77464	1.65812	0.466139	5.89815	1.658(0.466,5.898)	0.922822
	ENSG00000118762	4	PKD2	88963874	rs4693923	4	88888113	A	G	0.10835	-0.0432869	0.0554747	0.435214	0.332694	0.01241	2.56511e-158	-0.13011	0.166814	0.435408	0.56371	20	-0.457065	0.196845	0.877999	0.633139	1.21756	0.878(0.633,1.218)	0.922822
	ENSG00000132356	5	PRKAA1	40778978	rs3805487	5	40796033	T	C	0.28827	-0.0295898	0.0378819	0.43474	0.0918401	0.00902534	2.54301e-24	-0.322188	0.41369	0.436089	0.482505	20	-1.13302	0.488644	0.724562	0.322059	1.6301	0.725(0.322,1.63)	0.922822
	ENSG00000100299	22	ARSA	51065026	rs6151429	22	51063477	C	T	0.0815109	-0.0533393	0.0685912	0.436781	-0.903755	0.0150632	0	0.0590196	0.0759021	0.43682	0.864051	20	-0.0897485	0.207788	1.0608	0.914161	1.23095	1.061(0.914,1.231)	0.922822
	ENSG00000132170	3	PPARG	12402361	rs1699346	3	12504295	C	A	0.427435	-0.0278679	0.0360215	0.439141	0.252822	0.00794678	4.09248e-222	-0.110227	0.14252	0.439276	0.63856	20	-0.389566	0.169112	0.895631	0.677351	1.18425	0.896(0.677,1.184)	0.922822
	ENSG00000119782	2	FKBP1B	24279561	rs12713147	2	24259352	C	T	0.140159	-0.0381889	0.0493247	0.438792	0.250209	0.0205507	4.21358e-34	-0.152628	0.197532	0.439715	0.381782	20	-0.539791	0.234535	0.858449	0.58287	1.26432	0.858(0.583,1.264)	0.922822
	ENSG00000165029	9	ABCA1	107616900	rs2487052	9	107686405	T	C	0.234592	0.0321226	0.0416773	0.440859	-0.141457	0.00940563	4.03978e-51	-0.227084	0.295016	0.441458	0.625967	20	-0.805315	0.351147	0.796854	0.446947	1.4207	0.797(0.447,1.421)	0.922822
	ENSG00000196296	16	ATP2A1	28902778	rs4788101	16	28867804	T	C	0.329026	0.0273414	0.0354911	0.441078	0.0899511	0.00817588	3.73748e-28	0.303959	0.395526	0.442195	0.935855	20	-0.471272	1.07919	1.35521	0.624208	2.9423	1.355(0.624,2.942)	0.922822
	ENSG00000130649	10	CYP2E1	135354317	rs12253520	10	135235321	A	C	0.22167	-0.0367045	0.0478234	0.442784	-0.1495	0.01037	4.06901e-47	0.245515	0.320342	0.443429	0.97307	20	-0.382355	0.873385	1.27828	0.682253	2.39501	1.278(0.682,2.395)	0.922822
	ENSG00000139644	12	TMBIM6	50130112	rs11837639	12	50151352	A	G	0.0646123	-0.0541015	0.0710554	0.446418	0.176008	0.0161452	1.13249e-27	-0.307381	0.404689	0.447524	0.894624	20	-1.10057	0.485809	0.73537	0.332681	1.62549	0.735(0.333,1.625)	0.922822
	ENSG00000151778	13	SERP2	44959825	rs78623598	13	44927474	A	G	0.0685885	0.0563705	0.0742106	0.447493	0.25457	0.017066	2.5627e-50	0.221434	0.291891	0.44808	0.510292	19	-0.350672	0.79354	1.24786	0.704214	2.21121	1.248(0.704,2.211)	0.922822
	ENSG00000121879	3	PIK3CA	178911891	rs10936990	3	178800879	G	T	0.419483	0.0263446	0.0346641	0.447256	-0.0930482	0.00803803	5.45324e-31	-0.283129	0.373341	0.448232	0.0960971	20	-1.01488	0.448619	0.753423	0.362447	1.56615	0.753(0.362,1.566)	0.922822
	ENSG00000072401	10	UBE2D1	60112069	rs4390300	10	60144207	A	G	0.467197	0.0266224	0.0351064	0.448251	-0.839583	0.00956566	0	-0.031709	0.0418156	0.448268	0.421415	20	-0.113668	0.0502496	0.968788	0.892555	1.05153	0.969(0.893,1.052)	0.922822
	ENSG00000196396	20	PTPN1	49164095	rs117426663	20	49101446	A	C	0.0705765	-0.0528753	0.0703382	0.452214	-0.506907	0.0176187	4.94742e-182	0.10431	0.138807	0.452368	0.790796	20	-0.167752	0.376372	1.10994	0.845564	1.45699	1.11(0.846,1.457)	0.922822
	ENSG00000099219	9	ERMP1	5799096	rs10815290	9	5841963	A	G	0.139165	0.0397109	0.0528576	0.452484	-0.691333	0.0130731	0	-0.057441	0.0764652	0.45253	0.520143	20	-0.207313	0.0924308	0.944178	0.812765	1.09684	0.944(0.813,1.097)	0.922822
	ENSG00000139641	12	ESYT1	56525244	rs2640569	12	56508821	T	C	0.126243	0.0407125	0.0543611	0.453902	0.145926	0.0130587	5.42941e-29	0.278994	0.373361	0.454913	0.562524	20	-0.452794	1.01078	1.3218	0.635849	2.74775	1.322(0.636,2.748)	0.922822
	ENSG00000167881	17	SRP68	74051959	rs7409	17	74035543	C	T	0.375746	0.0293809	0.0393106	0.454819	-0.163848	0.00850427	1.0245e-82	-0.179318	0.240101	0.455159	0.0905685	20	-0.649916	0.29128	0.83584	0.52209	1.33814	0.836(0.522,1.338)	0.922822
	ENSG00000145191	3	EIF2B5	184127686	rs843359	3	183861064	A	G	0.553678	-0.0256096	0.034301	0.455298	-0.0880671	0.00835013	5.25571e-26	0.290796	0.390462	0.456424	0.457933	20	-0.47451	1.0561	1.33749	0.62219	2.87514	1.337(0.622,2.875)	0.922822
	ENSG00000117984	11	CTSD	1779602	rs59571891	11	1771188	G	T	0.239563	0.0308936	0.0414235	0.455788	-0.134718	0.0102946	3.94869e-39	-0.229321	0.307983	0.456519	0.309096	20	-0.832968	0.374326	0.795073	0.434757	1.45401	0.795(0.435,1.454)	0.922822
	ENSG00000128272	22	ATF4	39917195	rs1028320	22	39926861	A	G	0.327038	-0.0270691	0.0363947	0.457018	0.135449	0.0088479	6.699e-53	-0.199847	0.269014	0.457549	0.0689206	20	-0.727114	0.32742	0.818856	0.483302	1.38738	0.819(0.483,1.387)	0.922822
	ENSG00000168071	11	CCDC88B	64116350	rs1199046	11	64118126	T	C	0.367793	-0.0270995	0.0365777	0.458769	-0.433019	0.00781231	0	0.0625827	0.0844788	0.458809	0.0683043	20	-0.102996	0.228161	1.06458	0.902131	1.25629	1.065(0.902,1.256)	0.922822
	ENSG00000184787	21	UBE2G2	46205444	rs62220109	21	46213074	G	C	0.316103	0.0269628	0.0365394	0.460569	-0.246093	0.00831899	2.53932e-192	-0.109563	0.148524	0.460709	0.632424	20	-0.40067	0.181544	0.896226	0.669871	1.19907	0.896(0.67,1.199)	0.922822
	ENSG00000141458	18	NPC1	21126584	rs7227589	18	21075192	T	G	0.207753	-0.0326171	0.0444968	0.463546	-0.330142	0.00981014	2.80877e-248	0.0987974	0.134813	0.463652	0.815791	20	-0.165436	0.363031	1.10384	0.847524	1.43768	1.104(0.848,1.438)	0.922822
	ENSG00000120889	8	TNFRSF10B	22902169	rs7009522	8	22957606	G	A	0.230616	0.0308773	0.0421316	0.463633	0.48875	0.00965733	0	0.0631761	0.0862118	0.46368	0.000630199	20	-0.105799	0.232151	1.06521	0.899605	1.26131	1.065(0.9,1.261)	0.922822
	ENSG00000116663	1	FBXO6	11729296	rs3125819	1	11726682	A	G	0.393638	0.0265715	0.0363113	0.46431	-0.222855	0.00933035	4.38564e-126	-0.119232	0.163013	0.464519	0.821739	20	-0.438737	0.200273	0.887602	0.64485	1.22174	0.888(0.645,1.222)	0.922822
	ENSG00000100197	22	CYP2D6	42524704	rs2284087	22	42485671	T	C	0.462227	0.0255738	0.0350069	0.465063	-0.299306	0.00854005	4.28634e-269	-0.0854438	0.116986	0.46516	0.710652	20	-0.314736	0.143849	0.918105	0.729981	1.15471	0.918(0.73,1.155)	0.922822
	ENSG00000198513	14	ATL1	51049506	rs2275591	14	50778816	A	C	0.440358	0.0255306	0.0349956	0.465672	0.10612	0.00881508	2.23239e-33	0.240583	0.33038	0.46649	0.271738	20	-0.406962	0.888128	1.27199	0.66567	2.43057	1.272(0.666,2.431)	0.922822
	ENSG00000070669	7	ASNS	97491642	rs7784883	7	97593885	T	C	0.229622	0.0327716	0.0451161	0.467603	0.640389	0.00949323	0	0.0511746	0.0704552	0.467629	0.578546	20	-0.0869176	0.189267	1.05251	0.916753	1.20836	1.053(0.917,1.208)	0.922822
	ENSG00000086232	7	EIF2AK1	6080371	rs11766581	7	6069983	C	T	0.321074	0.0270901	0.0374248	0.469156	0.21154	0.00831474	8.74483e-143	0.128061	0.176987	0.469336	0.310456	20	-0.218834	0.474956	1.13662	0.803455	1.60794	1.137(0.803,1.608)	0.922822
	ENSG00000083444	1	PLOD1	12014928	rs56243319	1	12048595	C	T	0.399602	0.0256897	0.035574	0.470204	0.633457	0.00732549	0	0.0405547	0.0561604	0.470219	0.996172	20	-0.0695197	0.150629	1.04139	0.932842	1.16257	1.041(0.933,1.163)	0.922822
	ENSG00000134333	11	LDHA	18422953	rs6486423	11	18415057	G	T	0.418489	-0.0258163	0.0357555	0.47028	0.178248	0.00885406	3.88608e-90	-0.144834	0.200723	0.470565	0.171572	20	-0.538251	0.248583	0.865166	0.583768	1.28221	0.865(0.584,1.282)	0.922822
	ENSG00000127948	7	POR	75572345	rs28446604	7	75662518	T	C	0.176938	-0.0317777	0.0441211	0.471378	0.403317	0.0100179	0	-0.078791	0.109413	0.471449	0.844319	20	-0.29324	0.135658	0.924233	0.745843	1.14529	0.924(0.746,1.145)	0.922822
	ENSG00000120885	8	CLU	27463491	rs73231005	8	27470778	G	C	0.271372	0.0305253	0.0423138	0.470662	0.0775688	0.00924121	4.70681e-17	0.393525	0.547511	0.472294	0.847236	20	-0.679597	1.46665	1.4822	0.506821	4.33467	1.482(0.507,4.335)	0.922822
	ENSG00000167815	19	PRDX2	12910164	rs897804	19	12876964	C	G	0.439364	-0.0299853	0.0423761	0.479194	0.235476	0.00955092	3.26881e-134	-0.127339	0.180033	0.479375	0.347799	20	-0.480204	0.225526	0.880435	0.618657	1.25298	0.88(0.619,1.253)	0.922822
	ENSG00000081307	3	UBA5	132385115	rs9844024	3	132267339	G	A	0.215706	-0.0298778	0.0420477	0.477351	-0.0581274	0.0105782	3.90709e-08	0.514005	0.729394	0.480996	0.23913	10	-0.915607	1.94362	1.67197	0.400273	6.98397	1.672(0.4,6.984)	0.922822
	ENSG00000142192	21	APP	27398153	rs2830076	21	27502468	T	C	0.353877	0.0257425	0.0365203	0.480884	0.217559	0.00833331	3.0202e-150	0.118324	0.167925	0.481044	0.727976	20	-0.210809	0.447457	1.12561	0.809929	1.56433	1.126(0.81,1.564)	0.922822
	ENSG00000075624	7	ACTB	5585098	rs4296949	7	5508644	C	T	0.310139	-0.025706	0.0363238	0.479138	-0.104922	0.0186315	1.7875e-08	0.245002	0.348923	0.482575	0.955536	20	-0.438887	0.928891	1.27762	0.644754	2.5317	1.278(0.645,2.532)	0.922822
	ENSG00000000419	20	DPM1	49563248	rs2426214	20	49573810	A	G	0.347913	-0.0246625	0.0353818	0.485779	-0.0741559	0.00824705	2.43208e-19	0.332576	0.478559	0.487085	0.239855	20	-0.6054	1.27055	1.39456	0.545856	3.56282	1.395(0.546,3.563)	0.922822
	ENSG00000166167	10	BTRC	103215449	rs11191021	10	103231641	G	A	0.152087	0.0371709	0.0534779	0.487011	0.186113	0.0121183	3.13082e-53	0.199723	0.287635	0.487456	0.219924	20	-0.364042	0.763488	1.22106	0.694862	2.14575	1.221(0.695,2.146)	0.922822
	ENSG00000231925	6	TAPBP	33274817	rs3106190	6	33280629	C	G	0.503976	-0.023834	0.0343229	0.487428	-0.21709	0.0120085	4.75e-73	0.109788	0.158221	0.487749	0.440306	20	-0.200325	0.419901	1.11604	0.818465	1.52181	1.116(0.818,1.522)	0.922822
	ENSG00000101400	20	SNTA1	32013729	rs55990870	20	32302908	T	C	0.241551	-0.0279206	0.0401523	0.486825	0.0847457	0.00942393	2.4145e-19	-0.329463	0.475212	0.488123	0.62612	20	-1.26088	0.601953	0.71931	0.283405	1.82568	0.719(0.283,1.826)	0.922822
	ENSG00000106211	7	HSPB1	75932736	rs2868371	7	75930759	G	C	0.257455	0.0278977	0.0401349	0.486993	-0.124305	0.0136593	9e-20	-0.224429	0.323814	0.488259	0.892497	20	-0.859104	0.410246	0.798972	0.423541	1.50719	0.799(0.424,1.507)	0.922822
	ENSG00000134109	3	EDEM1	5245486	rs62255918	3	5263126	A	G	0.0785288	0.0489544	0.0705239	0.487586	0.165308	0.0158676	2.05218e-25	0.29614	0.427566	0.488549	0.457457	20	-0.541889	1.13417	1.34466	0.581648	3.10859	1.345(0.582,3.109)	0.922822
	ENSG00000130164	19	LDLR	11222265	rs8110515	19	11248426	G	T	0.161034	-0.0353036	0.0508528	0.487537	0.0915967	0.0120509	2.9431e-14	-0.385424	0.557492	0.489343	0.653855	20	-1.47811	0.70726	0.680162	0.228069	2.02843	0.68(0.228,2.028)	0.922822
	ENSG00000184009	17	ACTG1	79483935	rs9897709	17	79454362	T	C	0.204771	-0.0332802	0.0481292	0.489267	-0.141196	0.0106178	2.37741e-40	0.235702	0.341329	0.489853	0.85945	20	-0.433303	0.904707	1.2658	0.648364	2.47121	1.266(0.648,2.471)	0.922822
	ENSG00000183023	2	SLC8A1	40588739	rs55742439	2	40682975	A	G	0.33002	-0.0250792	0.0363437	0.490158	-0.239651	0.00840844	1.12882e-178	0.104649	0.151697	0.490286	0.399886	20	-0.192677	0.401975	1.11032	0.824748	1.49477	1.11(0.825,1.495)	0.922822
	ENSG00000198848	16	CES1	55852006	rs12443580	16	55866337	C	T	0.272366	-0.0506991	0.0735414	0.490575	-0.763347	0.018878	0	0.0664168	0.0963547	0.490638	0.405962	20	-0.122438	0.255272	1.06867	0.88476	1.29081	1.069(0.885,1.291)	0.922822
	ENSG00000066322	1	ELOVL1	43831382	rs839758	1	43862158	G	A	0.44831	-0.0237966	0.0344491	0.489707	-0.0800604	0.00800972	1.5964e-23	0.297233	0.431316	0.49074	0.744432	20	-0.548146	1.14261	1.34613	0.57802	3.13495	1.346(0.578,3.135)	0.922822
	ENSG00000221983	19	UBA52	18685450	rs62137090	19	18677057	A	G	0.43837	0.026368	0.0383559	0.491796	-0.399385	0.01028	0	-0.0660213	0.0960522	0.491863	0.795789	20	-0.254284	0.122241	0.936111	0.775472	1.13003	0.936(0.775,1.13)	0.922822
	ENSG00000171135	3	JAGN1	9934135	rs279557	3	9933723	G	A	0.446322	0.0243874	0.03552	0.492346	0.245337	0.00862597	6.1724e-178	0.0994035	0.144822	0.492472	0.948699	20	-0.184448	0.383255	1.10451	0.831563	1.46705	1.105(0.832,1.467)	0.922822
	ENSG00000067182	12	TNFRSF1A	6444601	rs1800692	12	6442346	A	G	0.367793	-0.0247693	0.0361156	0.492817	0.253907	0.00813418	6.70962e-214	-0.0975528	0.142274	0.492922	0.880007	15	-0.37641	0.181304	0.907054	0.686321	1.19878	0.907(0.686,1.199)	0.922822
	ENSG00000153094	2	BCL2L11	111901489	rs113135335	2	111887754	G	T	0.117296	-0.0350139	0.0511604	0.493725	0.164709	0.0127383	3.04029e-38	-0.212581	0.311046	0.49433	0.00221524	20	-0.822231	0.397069	0.808495	0.43945	1.48746	0.808(0.439,1.487)	0.922822
	ENSG00000075790	7	BCAP29	107245018	rs6957510	7	107217020	A	G	0.054672	0.0517816	0.0758077	0.494565	-0.173949	0.017704	8.75255e-23	-0.297684	0.436857	0.495605	0.466407	20	-1.15392	0.558556	0.742536	0.315397	1.74815	0.743(0.315,1.748)	0.922822
	ENSG00000177239	9	MAN1B1	139992507	rs72763269	9	140005916	A	G	0.357853	0.0263471	0.0387412	0.496454	-0.443417	0.00973464	0	-0.0594183	0.0873793	0.496502	0.809003	20	-0.230682	0.111845	0.942313	0.793992	1.11834	0.942(0.794,1.118)	0.922822
	ENSG00000128228	22	SDF2L1	21997568	rs3804071	22	22006440	C	T	0.333996	-0.0266857	0.0391416	0.495382	0.0598121	0.00860383	3.6065e-12	-0.446159	0.657548	0.497443	0.474282	20	-1.73495	0.842635	0.640082	0.176408	2.32248	0.64(0.176,2.322)	0.922822
	ENSG00000142208	14	AKT1	105248887	rs45490496	14	105272678	A	T	0.389662	-0.0249062	0.036739	0.497821	-0.286334	0.00941679	4.46593e-203	0.0869829	0.12834	0.497928	0.934237	20	-0.164564	0.338529	1.09088	0.848264	1.40288	1.091(0.848,1.403)	0.922822
	ENSG00000128595	7	CALU	128395603	rs339060	7	128375603	A	G	0.43837	0.0246485	0.036364	0.497881	0.191266	0.00791159	4.03766e-129	0.128871	0.190198	0.49805	0.771231	20	-0.243917	0.501659	1.13754	0.783553	1.65146	1.138(0.784,1.651)	0.922822
	ENSG00000172893	11	DHCR7	71151576	rs10898144	11	71151540	T	A	0.258449	0.0269782	0.0396513	0.496259	-0.0517344	0.00913616	1.491e-08	-0.521476	0.771952	0.49934	0.484562	7	-2.0345	0.99155	0.593644	0.130746	2.69541	0.594(0.131,2.695)	0.922822
	ENSG00000117601	1	SERPINC1	173879731	rs767053	1	173903737	A	G	0.116302	-0.0368502	0.0547399	0.500828	0.439698	0.0126086	1.90836e-266	-0.0838079	0.124517	0.500908	0.664127	20	-0.327861	0.160245	0.919608	0.720463	1.1738	0.92(0.72,1.174)	0.922822
	ENSG00000170540	16	ARL6IP1	18807995	rs2291662	16	18823192	G	A	0.39165	0.0237119	0.0354038	0.503014	-0.272004	0.00842174	7.50987e-229	-0.0871748	0.130187	0.503106	0.846812	20	-0.342341	0.167992	0.916517	0.710106	1.18293	0.917(0.71,1.183)	0.922822
	ENSG00000166794	15	PPIB	64451707	rs895885	15	64446972	C	G	0.200795	-0.0291088	0.0434306	0.502706	0.0517438	0.00949115	4.98631e-08	-0.562557	0.845658	0.505904	0.439974	20	-2.22005	1.09493	0.56975	0.108604	2.98898	0.57(0.109,2.989)	0.922822
	ENSG00000130513	19	GDF15	18492764	rs4808795	19	18501035	A	G	0.246521	0.0277954	0.0417787	0.505858	0.216695	0.0104496	1.59967e-95	0.12827	0.192899	0.506077	0.627307	20	-0.249812	0.506352	1.13686	0.778947	1.65923	1.137(0.779,1.659)	0.922822
	ENSG00000166598	12	HSP90B1	104335654	rs66467677	12	104316105	A	G	0.15507	-0.0331681	0.0497208	0.504716	-0.133024	0.0170894	7.02667e-15	0.249339	0.375143	0.506274	0.968393	20	-0.485941	0.984619	1.28318	0.615118	2.67679	1.283(0.615,2.677)	0.922822
	ENSG00000166347	18	CYB5A	71939890	rs12458414	18	71916055	C	T	0.261431	0.0259318	0.0391688	0.507938	0.2074	0.00883156	5.94378e-122	0.125032	0.188931	0.508107	0.205389	20	-0.245273	0.495337	1.13318	0.782491	1.64105	1.133(0.782,1.641)	0.922822
	ENSG00000135486	12	HNRNPA1	54677424	rs35979828	12	54685880	T	C	0.0854871	0.0492883	0.0746237	0.508939	0.169619	0.0193359	1.7521e-18	0.290583	0.441195	0.510136			-0.574159	1.15533	1.33721	0.563178	3.17506	1.337(0.563,3.175)	0.922822
	ENSG00000198626	1	RYR2	237667432	rs790901	1	237957161	A	G	0.349901	-0.0249619	0.0379106	0.510255	-0.215895	0.00878572	2.43197e-133	0.115621	0.17566	0.510406	0.0334102	20	-0.228673	0.459915	1.12257	0.795589	1.58394	1.123(0.796,1.584)	0.922822
	ENSG00000134049	18	IER3IP1	44692079	rs2635056	18	44710568	G	A	0.394632	-0.0233741	0.035417	0.509275	-0.0548918	0.0080866	1.137e-11	0.425821	0.648257	0.511265	0.0676632	20	-0.844763	1.6964	1.53085	0.429659	5.4543	1.531(0.43,5.454)	0.922822
	ENSG00000101460	20	MAP1LC3A	33141403	rs6059919	20	33151545	G	T	0.11829	0.0322434	0.0491735	0.512012	-0.582393	0.0103008	0	-0.0553636	0.0844391	0.512041	0.687547	20	-0.220864	0.110137	0.946141	0.801826	1.11643	0.946(0.802,1.116)	0.922822
	ENSG00000182087	19	TMEM259	1013642	rs2240160	19	1011215	A	G	0.172962	0.031838	0.0485431	0.511908	0.237927	0.0148721	1.3152e-57	0.133814	0.204196	0.512262	0.858077	20	-0.26641	0.534038	1.14318	0.766125	1.70581	1.143(0.766,1.706)	0.922822
	ENSG00000110057	11	UNC93B1	67765513	rs9735664	11	67738416	C	G	0.15507	-0.0338822	0.0516312	0.511673	0.114827	0.0117735	1.791e-22	-0.295072	0.45066	0.512626	0.235976	20	-1.17837	0.588222	0.744478	0.307781	1.80078	0.744(0.308,1.801)	0.922822
	ENSG00000139921	14	TMX1	51714819	rs12432203	14	51710861	G	A	0.111332	0.0362989	0.0554998	0.513088	-0.325403	0.012419	2.52142e-151	-0.111551	0.17061	0.513219	0.0795664	20	-0.445947	0.222845	0.894446	0.640218	1.24963	0.894(0.64,1.25)	0.922822
	ENSG00000073756	1	PTGS2	186645241	rs2273169	1	186948862	A	G	0.54175	-0.0227184	0.0347512	0.513276	0.194069	0.00789725	2.38464e-133	-0.117064	0.17913	0.513425	0.684675	20	-0.468159	0.234031	0.889528	0.626154	1.26368	0.89(0.626,1.264)	0.922822
	ENSG00000143799	1	PARP1	226572086	rs3219023	1	226591056	C	T	0.16998	0.0298813	0.045977	0.515745	0.447748	0.0103679	0	0.0667369	0.102697	0.515792	0.287149	20	-0.134549	0.268023	1.06901	0.87411	1.30738	1.069(0.874,1.307)	0.922822
	ENSG00000151779	2	NBAS	15504243	rs4133515	2	15696655	A	G	0.311133	0.0247741	0.0381162	0.515716	-0.15179	0.0083639	1.32676e-73	-0.163213	0.251273	0.515985	0.465769	20	-0.655708	0.329282	0.84941	0.519074	1.38997	0.849(0.519,1.39)	0.922822
	ENSG00000242252	1	BGLAP	156212432	rs12119005	1	156241354	A	G	0.289264	0.025043	0.0385436	0.515865	0.0835526	0.0093499	4.02779e-19	0.299728	0.462528	0.516971	0.171765	17	-0.606827	1.20628	1.34949	0.545078	3.34104	1.349(0.545,3.341)	0.922822
	ENSG00000137700	11	SLC37A4	118898220	rs11602764	11	118888619	G	A	0.270378	0.0265181	0.0409331	0.517089	0.166537	0.00899384	1.51157e-76	0.159232	0.24594	0.517345	0.785089	20	-0.32281	0.641274	1.17261	0.724111	1.8989	1.173(0.724,1.899)	0.922822
	ENSG00000085872	19	CHERP	16641020	rs8103548	19	16714966	C	T	0.0775348	-0.0449553	0.0694158	0.517228	-0.121858	0.0154666	3.3054e-15	0.368915	0.571565	0.518638	0.679794	16	-0.751352	1.48918	1.44616	0.471728	4.43347	1.446(0.472,4.433)	0.922822
	ENSG00000115275	2	MOGS	74690360	rs3755448	2	74740961	T	C	0.153082	-0.0335334	0.0519417	0.51854	0.142326	0.0116287	1.91908e-34	-0.235609	0.365455	0.519121	0.468458	20	-0.951901	0.480683	0.79009	0.386007	1.61718	0.79(0.386,1.617)	0.922822
	ENSG00000099622	19	CIRBP	1267131	rs12609287	19	1271274	C	T	0.208748	-0.0281021	0.043545	0.518695	-0.10508	0.0110039	1.3045e-21	0.267435	0.415343	0.519647	0.684443	10	-0.546637	1.08151	1.30661	0.578893	2.94912	1.307(0.579,2.949)	0.922822
	ENSG00000147894	9	C9orf72	27560204	rs774358	9	27559997	T	A	0.281312	-0.0247321	0.0385409	0.521061	-0.564992	0.0084538	0	0.0437743	0.0682182	0.52108	0.79068	20	-0.0899334	0.177482	1.04475	0.913992	1.19421	1.045(0.914,1.194)	0.923377
	ENSG00000086598	12	TMED2	124076097	rs4930709	12	124099093	T	C	0.248509	-0.025909	0.0406595	0.523982	0.172891	0.00930114	4.00381e-77	-0.149857	0.235312	0.524226	0.742522	20	-0.611069	0.311355	0.860831	0.542771	1.36527	0.861(0.543,1.365)	0.926957
	ENSG00000012660	6	ELOVL5	53173071	rs113274699	6	53213479	T	C	0.136183	-0.0336747	0.0531781	0.526574	0.226326	0.0122647	4.89652e-76	-0.148789	0.2351	0.526817	0.372632	20	-0.609585	0.312007	0.861751	0.543576	1.36616	0.862(0.544,1.366)	0.928895
	ENSG00000136026	12	CKAP4	106664856	rs7965616	12	106688149	G	A	0.284294	0.0244993	0.0387983	0.527744	0.12574	0.00871571	3.50992e-47	0.194841	0.308855	0.528139	0.504036	20	-0.410515	0.800197	1.21512	0.663309	2.22598	1.215(0.663,2.226)	0.928895
	ENSG00000214548	14	MEG3	101286557	rs12881760	14	101176335	G	C	0.348907	-0.0233473	0.0370574	0.528676	-0.51462	0.00955136	0	0.0453679	0.0720142	0.528704	0.110927	20	-0.0957799	0.186516	1.04641	0.908664	1.20504	1.046(0.909,1.205)	0.928895
	ENSG00000168000	11	BSCL2	62467532	rs475417	11	62608677	C	T	0.0218688	0.0635791	0.101707	0.531891	0.553039	0.0198391	5.1714e-171	0.114963	0.183951	0.531994	0.457002	12	-0.245581	0.475507	1.12183	0.78225	1.60883	1.122(0.782,1.609)	0.932688
	ENSG00000030110	6	BAK1	33544174	rs210143	6	33546930	T	C	0.27336	0.0243702	0.0391963	0.534107	0.668346	0.0121344	0	0.0364635	0.0586504	0.534133	0.501733	20	-0.0784913	0.151418	1.03714	0.92451	1.16348	1.037(0.925,1.163)	0.93445
	ENSG00000049239	1	H6PD	9313115	rs12042692	1	9320004	G	T	0.324056	0.0229435	0.0373289	0.538798	0.392922	0.00807308	0	0.0583921	0.0950111	0.538831	0.288758	20	-0.12783	0.244614	1.06013	0.880003	1.27713	1.06(0.88,1.277)	0.936633
	ENSG00000065485	3	PDIA5	122864991	rs9823527	3	122842611	G	A	0.411531	-0.0215587	0.0351366	0.539502	0.193943	0.0118878	7.79695e-60	-0.11116	0.181298	0.539788	0.963068	20	-0.466504	0.244184	0.894796	0.627191	1.27658	0.895(0.627,1.277)	0.936633
	ENSG00000136478	17	TEX2	62282624	rs8072646	17	62284510	G	A	0.192843	0.0270755	0.0440186	0.538494	0.0697062	0.00989582	1.86801e-12	0.388423	0.633891	0.540034	0.596562	17	-0.854003	1.63085	1.47465	0.425707	5.10821	1.475(0.426,5.108)	0.936633
	ENSG00000114270	3	COL7A1	48617103	rs6446277	3	49473077	A	G	0.336978	-0.0238018	0.0388573	0.540178	0.061696	0.0086093	7.71083e-13	-0.385792	0.632116	0.541651	0.127007	20	-1.62474	0.853155	0.679912	0.196963	2.34704	0.68(0.197,2.347)	0.936633
	ENSG00000108556	17	CHRNE	4803719	rs75602583	17	4808761	C	G	0.0964215	0.0355915	0.0585875	0.543524	0.343552	0.0133966	4.83207e-145	0.103599	0.170582	0.543637	0.112958	20	-0.230742	0.43794	1.10916	0.793944	1.54951	1.109(0.794,1.55)	0.936633
	ENSG00000126218	13	F10	113790485	rs7335409	13	113810186	T	C	0.171968	-0.0263205	0.0432575	0.542882	-0.0728078	0.0100929	5.4412e-13	0.361507	0.596243	0.54431	0.855443	20	-0.807129	1.53014	1.43549	0.446137	4.61884	1.435(0.446,4.619)	0.936633
	ENSG00000162892	1	IL24	207074136	rs291107	1	207075171	C	T	0.475149	0.0207719	0.0342578	0.544287	0.145037	0.00872685	5.02669e-62	0.143219	0.236358	0.544555	0.338364	20	-0.320043	0.606481	1.15398	0.726118	1.83397	1.154(0.726,1.834)	0.936633
	ENSG00000166405	11	RIC3	8159099	rs111285223	11	8147412	C	T	0.0934394	0.0365694	0.0603769	0.544724	-0.313765	0.0134559	2.91189e-120	-0.11655	0.192492	0.54486	0.965987	20	-0.493834	0.260734	0.889986	0.610282	1.29788	0.89(0.61,1.298)	0.936633
	ENSG00000159461	16	AMFR	56427407	rs35626903	16	56431613	A	G	0.472167	0.0216847	0.0360047	0.546991	-0.548017	0.00795708	0	-0.0395695	0.0657025	0.547006	0.365096	20	-0.168346	0.0892074	0.961203	0.845061	1.09331	0.961(0.845,1.093)	0.936633
	ENSG00000143815	1	LBR	225602915	rs11578124	1	225566620	G	T	0.282306	-0.0231769	0.0386604	0.548839	-0.0698734	0.00877344	1.663e-15	0.331698	0.554857	0.549968	0.999553	20	-0.755822	1.41922	1.39333	0.469625	4.13389	1.393(0.47,4.134)	0.936633
	ENSG00000164054	3	SHISA5	48525728	rs56298324	3	48435090	T	A	0.494036	-0.0211575	0.0355111	0.551309	-0.158849	0.00799716	8.47338e-88	0.133192	0.223653	0.551488	0.246273	20	-0.305168	0.571552	1.14247	0.737	1.77101	1.142(0.737,1.771)	0.936633
	ENSG00000138069	2	RAB1A	65327537	rs6546125	2	65309223	C	A	0.187873	0.025553	0.0427991	0.550477	-0.0581508	0.0100063	6.19529e-09	-0.439427	0.739876	0.552566	0.942694	20	-1.88958	1.01073	0.644406	0.151135	2.74761	0.644(0.151,2.748)	0.936633
	ENSG00000167645	19	YIF1B	38801833	rs34989303	19	38817876	A	G	0.182903	-0.028037	0.047301	0.553358	0.517943	0.0108046	0	-0.0541314	0.0913317	0.553388	0.322867	20	-0.233142	0.124879	0.947308	0.792041	1.13301	0.947(0.792,1.133)	0.936633
	ENSG00000148672	10	GLUD1	88832433	rs75121205	10	88949439	T	C	0.153082	0.0338559	0.0575322	0.556218	-0.175938	0.0189002	1.2928e-20	-0.19243	0.327655	0.557005	0.476046	20	-0.834634	0.449774	0.824952	0.434033	1.56796	0.825(0.434,1.568)	0.936633
	ENSG00000151247	4	EIF4E	99822311	rs7661487	4	99858094	G	A	0.426441	-0.0208759	0.0356146	0.557768	-0.27051	0.00947861	3.84669e-179	0.0771723	0.131685	0.557851	0.992267	20	-0.18093	0.335275	1.08023	0.834494	1.39832	1.08(0.834,1.398)	0.936633
	ENSG00000204267	6	TAP2	32798083	rs4148876	6	32796793	A	G	0.0735586	-0.0435758	0.0744185	0.558178	-1.19718	0.0338545	6.39673e-274	0.0363985	0.0621698	0.558232	0.392471	20	-0.0854543	0.158251	1.03707	0.918095	1.17146	1.037(0.918,1.171)	0.936633
	ENSG00000163590	3	PPM1L	160635042	rs9827509	3	160460477	G	A	0.0526839	0.0453503	0.0774914	0.558393	-0.489314	0.0169265	9.41751e-184	-0.0926813	0.1584	0.558474	0.274383	7	-0.403145	0.217783	0.911484	0.668215	1.24332	0.911(0.668,1.243)	0.936633
	ENSG00000175354	18	PTPN2	12857559	rs9965888	18	12775308	C	T	0.306163	-0.023957	0.0410138	0.559139	0.108752	0.00867435	4.67208e-36	-0.22029	0.377541	0.559565	0.854801	20	-0.96027	0.51969	0.802286	0.382789	1.68151	0.802(0.383,1.682)	0.936633
	ENSG00000160323	9	ADAMTS13	136301993	rs3118665	9	136283389	T	C	0.126243	0.0414991	0.0713978	0.56108	-0.270898	0.0158578	1.98643e-65	-0.153191	0.263712	0.561307	0.463129	20	-0.670067	0.363685	0.857966	0.511675	1.43862	0.858(0.512,1.439)	0.936633
	ENSG00000135249	7	RINT1	105190328	rs1728654	7	105195043	C	T	0.0596421	0.0429183	0.0738509	0.56114	-0.195609	0.016655	7.50999e-32	-0.219409	0.378005	0.561619	0.975657	20	-0.960299	0.521481	0.802993	0.382778	1.68452	0.803(0.383,1.685)	0.936633
	ENSG00000182446	17	NPLOC4	79569704	rs3208787	17	79525660	G	A	0.158052	-0.0352187	0.0607029	0.561791	0.28795	0.013914	3.84225e-95	-0.122308	0.210893	0.561945	0.548137	20	-0.535658	0.291042	0.884876	0.585284	1.33782	0.885(0.585,1.338)	0.936633
	ENSG00000149554	11	CHEK1	125520593	rs76045215	11	125495746	G	C	0.0725646	-0.0413787	0.0712782	0.561561	0.148176	0.0165808	4.01333e-19	-0.279255	0.482052	0.562384	0.445777	20	-1.22408	0.665567	0.756347	0.294029	1.94559	0.756(0.294,1.946)	0.936633
	ENSG00000089351	19	GRAMD1A	35501531	rs79239326	19	35507734	A	G	0.341948	-0.0220936	0.0382917	0.563951	-0.352669	0.00882432	0	0.0626469	0.108588	0.563992	0.227491	20	-0.150186	0.275479	1.06465	0.860548	1.31716	1.065(0.861,1.317)	0.936633
	ENSG00000116717	1	GADD45A	68152382	rs59711991	1	68240280	T	C	0.0795229	0.0374825	0.0649919	0.564124	-0.119833	0.0151726	2.8341e-15	-0.312789	0.543797	0.56516	0.215677	20	-1.37863	0.753053	0.731404	0.251923	2.12347	0.731(0.252,2.123)	0.936633
	ENSG00000136816	9	TOR1B	132569496	rs1831105	9	132588281	G	A	0.272366	0.0233675	0.0406993	0.565867	-0.46234	0.00913741	0	-0.0505417	0.0880346	0.565892	0.585618	20	-0.22309	0.122006	0.950714	0.800043	1.12976	0.951(0.8,1.13)	0.936633
	ENSG00000139112	12	GABARAPL1	10370392	rs10734821	12	10377435	G	A	0.10338	0.0357373	0.0622517	0.565915	-0.237381	0.0148343	1.23339e-57	-0.150548	0.262413	0.566165	0.940087	20	-0.664877	0.363781	0.860236	0.514337	1.43876	0.86(0.514,1.439)	0.936633
	ENSG00000101558	18	VAPA	9937008	rs624898	18	9851650	C	T	0.358847	-0.0210316	0.0367297	0.566912	0.366164	0.00816344	0	-0.0574377	0.100318	0.566944	0.961839	20	-0.254061	0.139186	0.944181	0.775645	1.14934	0.944(0.776,1.149)	0.936633
	ENSG00000127022	5	CANX	179131777	rs13182141	5	179126632	C	T	0.510934	-0.0204191	0.0357272	0.567642	0.252415	0.0116562	5.45303e-104	-0.0808948	0.141591	0.567777	0.738916	20	-0.358413	0.196624	0.922291	0.698784	1.21729	0.922(0.699,1.217)	0.936633
	ENSG00000197122	20	SRC	36003770	rs6090529	20	35976868	T	C	0.215706	0.0238042	0.0416339	0.567491	-0.080817	0.00939951	8.11174e-18	-0.294544	0.5163	0.568345	0.0588653	20	-1.30649	0.717404	0.744871	0.270768	2.04911	0.745(0.271,2.049)	0.936633
	ENSG00000128463	15	EMC4	34519778	rs73388020	15	34527085	A	C	0.205765	-0.0261182	0.046351	0.573102	-0.22684	0.020659	4.75869e-28	0.11514	0.204602	0.573606	0.606954	20	-0.28588	0.51616	1.12203	0.751353	1.67558	1.122(0.751,1.676)	0.938473
	ENSG00000116171	1	SCP2	53455138	rs1242331	1	53392908	A	G	0.347913	0.0209483	0.0372475	0.573837	-0.724308	0.00742631	0	-0.0289218	0.0514257	0.573844	0.262584	20	-0.129716	0.0718726	0.971492	0.878345	1.07452	0.971(0.878,1.075)	0.938473
	ENSG00000084073	1	ZMPSTE24	40741817	rs6600323	1	40743727	A	G	0.371769	0.0195437	0.0347354	0.573676	-0.127856	0.00797824	8.4671e-58	-0.152857	0.271843	0.573912	0.185726	20	-0.685669	0.379955	0.858252	0.503753	1.46222	0.858(0.504,1.462)	0.938473
	ENSG00000163932	3	PRKCD	53208379	rs2230494	3	53220215	A	G	0.286282	0.0222622	0.0395905	0.573903	0.203815	0.00885706	3.5677e-117	0.109228	0.194305	0.574017	0.230121	20	-0.27161	0.490066	1.11542	0.762152	1.63242	1.115(0.762,1.632)	0.938473
	ENSG00000074695	18	LMAN1	57011124	rs1984357	18	57022203	C	G	0.28827	-0.0213957	0.0384125	0.577529	0.447595	0.0107267	0	-0.0478015	0.0858275	0.577563	0.0627681	20	-0.216023	0.12042	0.953323	0.805716	1.12797	0.953(0.806,1.128)	0.939444
	ENSG00000139970	14	RTN1	60200189	rs7149695	14	60032694	G	C	0.0526839	-0.0447313	0.0803898	0.577917	-0.825006	0.0192051	0	0.0542194	0.0974497	0.577949	0.0165727	12	-0.136782	0.245221	1.05572	0.87216	1.2779	1.056(0.872,1.278)	0.939444
	ENSG00000100030	22	MAPK1	22165379	rs5754932	22	22100718	T	C	0.028827	-0.0489421	0.0879116	0.577719	0.248339	0.0180981	7.51765e-43	-0.197078	0.35429	0.578032	0.885049	12	-0.891486	0.49733	0.821127	0.410046	1.64433	0.821(0.41,1.644)	0.939444
	ENSG00000175582	11	RAB6A	73429560	rs1792199	11	73588570	G	A	0.307157	-0.0206471	0.0372598	0.579483	-0.262825	0.00862188	4.3122e-204	0.0785585	0.14179	0.579546	0.986552	20	-0.19935	0.356467	1.08173	0.819263	1.42827	1.082(0.819,1.428)	0.940051
	ENSG00000151067	12	CACNA1C	2441030	rs10505724	12	2782070	C	T	0.127237	0.0275903	0.0501744	0.582396	-0.0722915	0.0129937	2.6427e-08	-0.381653	0.697438	0.584226	0.96395	13	-1.74863	0.985325	0.682732	0.174012	2.67868	0.683(0.174,2.679)	0.945781
	ENSG00000154305	1	MIA3	222816391	rs2378585	1	222781822	A	G	0.163022	0.0258029	0.0473741	0.585986	-0.0805187	0.0117966	8.75592e-12	-0.320458	0.590232	0.587174	0.834941	20	-1.47731	0.836397	0.725817	0.22825	2.30804	0.726(0.228,2.308)	0.948688
	ENSG00000116001	2	TIA1	70456184	rs7585058	2	70487312	C	T	0.0685885	-0.0367203	0.0679144	0.588725	0.393679	0.0159485	1.57303e-134	-0.0932747	0.172554	0.588814	0.614132	20	-0.431481	0.244931	0.910943	0.649547	1.27753	0.911(0.65,1.278)	0.949478
	ENSG00000142676	1	RPL11	24020592	rs77766201	1	24006446	A	G	0.176938	-0.0260208	0.0485677	0.592122	-0.157503	0.0108401	7.86783e-48	0.165208	0.30857	0.592374	0.0180504	20	-0.439589	0.770005	1.17964	0.644301	2.15978	1.18(0.644,2.16)	0.953238
	ENSG00000174437	12	ATP2A2	110753729	rs11069214	12	110424595	A	C	0.0576541	-0.0420456	0.0784979	0.592217	0.0969967	0.0177663	4.77211e-08	-0.433474	0.81317	0.593987	0.628042	11	-2.02729	1.16034	0.648253	0.131692	3.19102	0.648(0.132,3.191)	0.953238
	ENSG00000171105	19	INSR	7203155	rs4640294	19	7297710	G	A	0.258449	0.024146	0.0452919	0.593951	0.0867737	0.009791	7.817e-19	0.278264	0.522897	0.594617	0.297825	17	-0.746614	1.30314	1.32083	0.473969	3.68084	1.321(0.474,3.681)	0.953238
	ENSG00000108465	17	CDK5RAP3	46052158	rs2525105	17	46039543	G	T	0.136183	-0.0276426	0.0521354	0.595968	-0.277033	0.0131849	5.15924e-98	0.0997809	0.188252	0.596085	0.918916	20	-0.269193	0.468755	1.10493	0.763996	1.598	1.105(0.764,1.598)	0.953682
	ENSG00000122218	1	COPA	160286126	rs7523769	1	160257980	T	A	0.4334	-0.018214	0.0344611	0.597125	0.196362	0.00793407	3.16251e-135	-0.0927575	0.175538	0.597209	0.0890975	20	-0.436812	0.251297	0.911414	0.646093	1.28569	0.911(0.646,1.286)	0.953682
	ENSG00000114988	2	LMAN2L	97388733	rs72809828	2	97392778	A	G	0.311133	-0.0193649	0.0368125	0.598858	0.168791	0.00843289	4.01147e-89	-0.114727	0.21817	0.598985	0.0727429	20	-0.54234	0.312886	0.89161	0.581386	1.36737	0.892(0.581,1.367)	0.953928
	ENSG00000104723	8	TUSC3	15449441	rs10095144	8	15389956	T	A	0.0536779	-0.0464159	0.0883389	0.599284	0.201483	0.0194669	4.1849e-25	-0.230372	0.439009	0.599754	0.669533	20	-1.09083	0.630086	0.794238	0.335938	1.87777	0.794(0.336,1.878)	0.953928
	ENSG00000025796	6	SEC63	108234176	rs7764235	6	108250130	C	T	0.15507	0.0258197	0.0494162	0.601326	0.191187	0.0113277	6.55425e-64	0.135049	0.258594	0.6015	0.515268	20	-0.371795	0.641893	1.14459	0.689495	1.90007	1.145(0.689,1.9)	0.953928
	ENSG00000115307	2	AUP1	74755419	rs6709863	2	74746080	T	C	0.158052	-0.0266005	0.0509732	0.601774	0.172226	0.0114761	6.56732e-51	-0.154451	0.296146	0.601993	0.816956	20	-0.734897	0.425995	0.856885	0.479555	1.53111	0.857(0.48,1.531)	0.953928
	ENSG00000120868	12	APAF1	99084061	rs3847874	12	99027045	T	A	0.182903	-0.0253931	0.0489718	0.604092	0.344441	0.0105049	8.58851e-236	-0.0737227	0.142195	0.604137	0.354314	20	-0.352425	0.20498	0.928929	0.702981	1.2275	0.929(0.703,1.227)	0.955488
	ENSG00000100393	22	EP300	41531935	rs13058113	22	41508414	T	G	0.304175	-0.0211858	0.0411004	0.606229	0.245407	0.00886317	9.63123e-169	-0.0863291	0.167507	0.606291	0.626505	20	-0.414643	0.241985	0.917292	0.660576	1.27377	0.917(0.661,1.274)	0.95682
	ENSG00000115317	2	HTRA2	74758488	rs2075743	2	74602142	C	T	0.0914513	-0.0343533	0.066823	0.607186	-0.13221	0.0138862	1.71519e-21	0.259839	0.506167	0.607709	0.228202	20	-0.732248	1.25193	1.29672	0.480827	3.49707	1.297(0.481,3.497)	0.95682
	ENSG00000173110	1	HSPA6	161495358	rs12142755	1	161481743	G	A	0.364811	0.022054	0.0431828	0.609551	-0.187963	0.0130825	8.26456e-47	-0.117332	0.229885	0.609777	0.342756	20	-0.567907	0.333243	0.88929	0.566711	1.39549	0.889(0.567,1.395)	0.95682
	ENSG00000150907	13	FOXO1	41185269	rs9549200	13	40976249	T	C	0.359841	-0.0181128	0.0355656	0.610556	-0.0848553	0.0081612	2.54791e-25	0.213455	0.419634	0.610984	0.646359	20	-0.609028	1.03594	1.23795	0.543879	2.81775	1.238(0.544,2.818)	0.95682
	ENSG00000106144	7	CASP2	142995048	rs73170676	7	142822734	A	C	0.0616302	-0.0541461	0.106425	0.610913	0.145387	0.0194021	6.71117e-14	-0.372426	0.733697	0.611732			-1.81047	1.06562	0.689061	0.163577	2.90264	0.689(0.164,2.903)	0.95682
	ENSG00000167780	12	SOAT2	53507812	rs2280699	12	53497698	G	A	0.197813	0.021258	0.0419818	0.612602	-0.199884	0.00977342	5.78995e-93	-0.106352	0.210095	0.612711	0.401946	20	-0.518138	0.305434	0.899108	0.595628	1.35721	0.899(0.596,1.357)	0.95682
	ENSG00000116133	1	DHCR24	55334098	rs4927176	1	55354335	C	T	0.412525	-0.0180739	0.0358205	0.613863	-0.240297	0.00798304	4.70141e-199	0.0752145	0.149088	0.613913	0.662815	20	-0.216998	0.367427	1.07812	0.804932	1.44401	1.078(0.805,1.444)	0.95682
	ENSG00000077463	19	SIRT6	4178353	rs107251	19	4176085	T	C	0.129225	0.0270799	0.0536962	0.614038	0.16852	0.0134974	8.96909e-36	0.160692	0.318893	0.614327	0.984807	9	-0.464338	0.785722	1.17432	0.628551	2.19399	1.174(0.629,2.194)	0.95682
	ENSG00000161011	5	SQSTM1	179249233	rs3734007	5	179252537	G	A	0.452286	0.0174255	0.0350665	0.61924	-0.218413	0.00787689	3.18381e-169	-0.0797825	0.160577	0.619296	0.59125	20	-0.394513	0.234948	0.923317	0.674008	1.26484	0.923(0.674,1.265)	0.95682
	ENSG00000068615	2	REEP1	86503161	rs4832255	2	86449548	T	G	0.127237	0.0274585	0.0556124	0.621484	0.799327	0.0114819	0	0.0343521	0.0695758	0.621493	0.718378	20	-0.102016	0.170721	1.03495	0.903015	1.18616	1.035(0.903,1.186)	0.95682
	ENSG00000124721	6	DNAH8	38840709	rs9380791	6	38830410	G	A	0.37674	-0.0171713	0.0348365	0.622076	-0.149503	0.00798488	3.20322e-78	0.114856	0.233097	0.622196	0.380553	20	-0.342014	0.571726	1.12171	0.710338	1.77132	1.122(0.71,1.771)	0.95682
	ENSG00000125538	2	IL1B	113590904	rs6542082	2	113464709	G	A	0.5	-0.0173685	0.0353187	0.622885	-0.0653327	0.00804194	4.51069e-16	0.265847	0.541587	0.62352	0.770718	15	-0.795664	1.32736	1.30454	0.451282	3.77107	1.305(0.451,3.771)	0.95682
	ENSG00000078140	4	UBE2K	39742038	rs11723405	4	39690216	G	A	0.496024	0.0167465	0.0346145	0.628528	0.181261	0.00790008	1.68371e-116	0.0923888	0.191008	0.628605	0.897528	20	-0.281987	0.466764	1.09679	0.754284	1.59483	1.097(0.754,1.595)	0.95682
	ENSG00000116830	1	TTF2	117624208	rs2801939	1	117622286	A	G	0.33996	-0.0177502	0.0367642	0.62923	0.261176	0.00870699	1.10324e-197	-0.0679626	0.140782	0.629274	0.100221	20	-0.343895	0.20797	0.934295	0.709003	1.23118	0.934(0.709,1.231)	0.95682
	ENSG00000136810	9	TXN	113012505	rs7035393	9	113023333	C	T	0.357853	-0.0179804	0.0373637	0.630355	-0.278456	0.00943568	2.08012e-191	0.0645718	0.134199	0.630401	0.473239	20	-0.198458	0.327602	1.0667	0.819994	1.38764	1.067(0.82,1.388)	0.95682
	ENSG00000162236	11	STX5	62586964	rs117611173	11	62612982	A	G	0.0427435	-0.0336368	0.0702174	0.631912	-0.190673	0.0173342	3.82981e-28	0.176411	0.36861	0.632234	0.572697	7	-0.546065	0.898887	1.19293	0.579225	2.45687	1.193(0.579,2.457)	0.95682
	ENSG00000185000	8	DGAT1	145545263	rs3757976	8	145536753	G	A	0.501988	0.0179744	0.0376985	0.633508	0.357934	0.0145614	2.01695e-133	0.0502171	0.105342	0.633572	0.265709	20	-0.156253	0.256687	1.0515	0.855343	1.29264	1.051(0.855,1.293)	0.95682
	ENSG00000145349	4	CAMK2D	114527635	rs77578393	4	114708746	G	A	0.083499	0.0288397	0.0605204	0.633698	0.346027	0.0134813	2.7177e-145	0.0833452	0.174931	0.633757	0.176142	20	-0.25952	0.42621	1.08692	0.771422	1.53144	1.087(0.771,1.531)	0.95682
	ENSG00000185122	8	HSF1	145526832	rs3757976	8	145536753	G	A	0.501988	0.0179744	0.0376985	0.633508	-0.0891607	0.0119743	9.62131e-14	-0.201596	0.423681	0.634202	0.167513	20	-1.03201	0.628819	0.817425	0.35629	1.87539	0.817(0.356,1.875)	0.95682
	ENSG00000144746	3	ARL6IP5	69144656	rs58747812	3	69148471	A	G	0.37674	0.0172573	0.036279	0.634301	0.168231	0.00815205	1.28811e-94	0.102581	0.215708	0.634391	0.457927	20	-0.320207	0.525369	1.10803	0.725999	1.69108	1.108(0.726,1.691)	0.95682
	ENSG00000197386	4	HTT	3161042	rs67950027	4	3152786	C	A	0.32505	-0.0184783	0.0389995	0.635637	0.0966917	0.0104765	2.7215e-20	-0.191105	0.40387	0.636081	0.223965	20	-0.98269	0.60048	0.826046	0.374303	1.82299	0.826(0.374,1.823)	0.95682
	ENSG00000166311	11	SMPD1	6413941	rs7103750	11	6411319	G	C	0.10835	-0.0281922	0.0595709	0.636032	-0.133591	0.0134677	3.42811e-23	0.211033	0.446426	0.636416	0.835522	10	-0.663962	1.08603	1.23495	0.514808	2.96248	1.235(0.515,2.962)	0.95682
	ENSG00000196730	9	DAPK1	90217845	rs7855635	9	90171608	C	T	0.328032	-0.0175019	0.0370425	0.636583	0.679648	0.00771925	0	-0.0257514	0.0545033	0.636588	0.631292	20	-0.132578	0.0810751	0.974577	0.875835	1.08445	0.975(0.876,1.084)	0.95682
	ENSG00000137801	15	THBS1	39882473	rs28790585	15	39668870	T	C	0.28827	0.0186926	0.0396029	0.636926	0.438253	0.00832921	0	0.0426525	0.0903689	0.63694	0.784981	20	-0.134471	0.219776	1.04358	0.874179	1.2458	1.044(0.874,1.246)	0.95682
	ENSG00000066427	14	ATXN3	92548930	rs3814834	14	92572927	A	G	0.0815109	-0.0285323	0.0612412	0.641286	0.329519	0.0134069	2.16104e-133	-0.0865879	0.185884	0.641346	0.416889	18	-0.450921	0.277745	0.917055	0.637041	1.32015	0.917(0.637,1.32)	0.95682
	ENSG00000143318	1	CASQ1	160165980	rs10797062	1	160136208	G	A	0.286282	-0.0179157	0.0388638	0.644807	0.503131	0.00826679	0	-0.0356085	0.0772461	0.644817	0.560553	20	-0.187011	0.115794	0.965018	0.829435	1.12276	0.965(0.829,1.123)	0.95682
	ENSG00000174672	11	BRSK2	1447524	rs11603658	11	1473987	C	T	0.483101	-0.0162889	0.0354975	0.646324	-0.0627047	0.00929317	1.5052e-11	0.259772	0.567413	0.647084	0.349544	20	-0.852357	1.3719	1.29663	0.426408	3.94284	1.297(0.426,3.943)	0.95682
	ENSG00000144554	3	FANCD2	10105856	rs2075310	3	10067651	T	C	0.201789	0.0193525	0.0422753	0.647116	-0.378564	0.0094703	0	-0.0511209	0.11168	0.647137	0.110123	20	-0.270014	0.167772	0.950164	0.763369	1.18267	0.95(0.763,1.183)	0.95682
	ENSG00000186480	7	INSIG1	155095715	rs12111603	7	155091753	A	T	0.492048	-0.0162912	0.0356217	0.647428	-0.431533	0.00759725	0	0.0377519	0.0825496	0.647438	0.901806	20	-0.124045	0.199549	1.03847	0.88334	1.22085	1.038(0.883,1.221)	0.95682
	ENSG00000136908	9	DPM2	130699070	rs76060109	9	130708271	A	G	0.0884692	-0.0279926	0.0613911	0.648411	0.299154	0.0136242	7.32692e-107	-0.0935726	0.20526	0.648481	0.462509	20	-0.495882	0.308737	0.910672	0.609033	1.3617	0.911(0.609,1.362)	0.95682
	ENSG00000126777	14	KTN1	56097017	rs112374071	14	56061919	T	C	0.0606362	-0.02816	0.061796	0.64861	-0.743961	0.0142406	0	0.0378515	0.0830666	0.648623	0.721829	20	-0.124959	0.200662	1.03858	0.882533	1.22221	1.039(0.883,1.222)	0.95682
	ENSG00000114354	3	TFG	100448007	rs591728	3	100433592	C	T	0.354871	-0.0170391	0.0374305	0.648951	0.568363	0.00800029	0	-0.0299792	0.065858	0.648958	0.178364	20	-0.159061	0.0991025	0.970466	0.852944	1.10418	0.97(0.853,1.104)	0.95682
	ENSG00000039068	16	CDH1	68820286	rs11642362	16	68811307	T	C	0.429423	-0.0162365	0.0359138	0.6512	-0.229472	0.00794555	2.0925e-183	0.0707557	0.156525	0.65124	0.370386	20	-0.236033	0.377545	1.07332	0.789754	1.4587	1.073(0.79,1.459)	0.95682
	ENSG00000180914	3	OXTR	8801704	rs171029	3	8982481	G	A	0.264414	-0.016896	0.0374578	0.651941	0.0787972	0.00860983	5.58887e-20	-0.214424	0.475946	0.652335	0.794272	20	-1.14728	0.71843	0.807006	0.3175	2.05121	0.807(0.317,2.051)	0.95682
	ENSG00000140416	15	TPM1	63349472	rs8042331	15	63338457	C	T	0.122266	0.0229629	0.0510275	0.652703	-0.48387	0.0108591	0	-0.0474568	0.105462	0.652719	0.100918	20	-0.254162	0.159249	0.953652	0.775566	1.17263	0.954(0.776,1.173)	0.95682
	ENSG00000117868	7	ESYT2	158573315	rs11761517	7	158532706	T	C	0.469185	-0.0166273	0.0371482	0.654447	-0.367075	0.00773161	0	0.0452967	0.101205	0.654461	0.25869	20	-0.153065	0.243659	1.04634	0.858074	1.27591	1.046(0.858,1.276)	0.95682
	ENSG00000158887	1	MPZ	161277143	rs16832949	1	161369594	A	T	0.0487078	-0.0301995	0.0674522	0.654357	-0.171945	0.0145175	2.31159e-32	0.175635	0.39257	0.654588	0.864787	9	-0.593802	0.945072	1.192	0.552224	2.573	1.192(0.552,2.573)	0.95682
	ENSG00000172070	20	SRXN1	641851	rs6085283	20	632959	T	C	0.459245	-0.0160782	0.0359365	0.654583	-0.692866	0.00881265	0	0.0232053	0.0518673	0.654588	0.827203	20	-0.0784546	0.124865	1.02348	0.924544	1.133	1.023(0.925,1.133)	0.95682
	ENSG00000181019	16	NQO1	69750876	rs2917667	16	69763778	A	G	0.106362	-0.0231763	0.0519895	0.65575	0.363781	0.0120637	9.22327e-200	-0.0637094	0.14293	0.655786	0.419871	20	-0.343852	0.216433	0.938278	0.709034	1.24164	0.938(0.709,1.242)	0.95682
	ENSG00000171791	18	BCL2	60888970	rs11152375	18	60906684	C	T	0.196819	0.0185188	0.0419177	0.658642	0.0636455	0.00970176	5.37362e-11	0.290967	0.660105	0.659365	0.931768	18	-1.00284	1.58477	1.33772	0.366837	4.87818	1.338(0.367,4.878)	0.95682
	ENSG00000131408	19	NR1H2	50859574	rs12984494	19	50898627	T	C	0.0874751	-0.0297628	0.0676126	0.659795	0.134503	0.0157856	1.5873e-17	-0.22128	0.503355	0.66022	0.849282	11	-1.20786	0.765296	0.801492	0.298837	2.14963	0.801(0.299,2.15)	0.95682
	ENSG00000160213	21	CSTB	45194359	rs35285321	21	45201832	A	G	0.314115	-0.0164573	0.0374614	0.660434	-0.769836	0.00767757	0	0.0213777	0.048662	0.660437	0.620535	20	-0.0739998	0.116755	1.02161	0.928672	1.12384	1.022(0.929,1.124)	0.95682
	ENSG00000167323	11	STIM1	3995098	rs4414209	11	3885511	G	T	0.33996	0.0161848	0.0369159	0.66108	0.154667	0.00842983	3.45018e-75	0.104643	0.238748	0.661171	0.834434	20	-0.363303	0.572589	1.11031	0.695376	1.77285	1.11(0.695,1.773)	0.95682
	ENSG00000167397	16	VKORC1	31104732	rs34649473	16	31066538	G	T	0.399602	0.0157615	0.0360633	0.662073	0.118745	0.00980622	9.44101e-34	0.132734	0.3039	0.66228	0.940618	20	-0.46291	0.728378	1.14195	0.629449	2.07172	1.142(0.629,2.072)	0.95682
	ENSG00000166471	11	TMEM41B	9319264	rs72850544	11	9336093	T	C	0.21173	0.0192481	0.0440679	0.662268	-0.855415	0.0167618	0	-0.0225015	0.0515182	0.66228	0.844829	20	-0.123477	0.0784742	0.97775	0.883842	1.08164	0.978(0.884,1.082)	0.95682
	ENSG00000117592	1	PRDX6	173452175	rs12744267	1	173486342	G	A	0.166004	-0.0195916	0.0450767	0.663833	0.327406	0.0101102	4.65564e-230	-0.0598388	0.137691	0.663861	0.78969	20	-0.329713	0.210036	0.941916	0.71913	1.23372	0.942(0.719,1.234)	0.95682
	ENSG00000172115	7	CYCS	25162345	rs62451620	7	25189612	T	C	0.0506958	-0.0309536	0.0716436	0.665705	0.257016	0.0258635	2.86201e-23	-0.120435	0.279015	0.666001	0.994718	20	-0.667304	0.426434	0.886535	0.51309	1.53179	0.887(0.513,1.532)	0.95682
	ENSG00000189050	17	RNFT1	58035861	rs12600680	17	58037374	C	T	0.154076	-0.0203252	0.0471248	0.666245	-0.456268	0.0179199	5.25229e-143	0.0445467	0.103298	0.66629	0.921411	20	-0.157917	0.247011	1.04555	0.85392	1.28019	1.046(0.854,1.28)	0.95682
	ENSG00000105854	7	PON2	95049342	rs2374993	7	95063702	G	T	0.129225	-0.0234108	0.0549232	0.669928	0.646868	0.0120305	0	-0.036191	0.084909	0.669938	0.670903	20	-0.202613	0.130231	0.964456	0.816594	1.13909	0.964(0.817,1.139)	0.95682
	ENSG00000142168	21	SOD1	33036589	rs67905949	21	33015159	C	A	0.0576541	0.034003	0.0800626	0.671052	0.206184	0.0253952	4.7004e-16	0.164916	0.388838	0.671475	0.701356	12	-0.597206	0.927038	1.17929	0.550347	2.52701	1.179(0.55,2.527)	0.95682
	ENSG00000134321	2	RSAD2	7022153	rs2250846	2	6976190	T	C	0.0298211	-0.0388153	0.0916682	0.671979	0.196893	0.0180219	8.73486e-28	-0.19714	0.465924	0.672211	0.613288	8	-1.11035	0.716071	0.821076	0.329443	2.04638	0.821(0.329,2.046)	0.95682
	ENSG00000213593	11	TMX2	57494258	rs71484461	11	57488890	A	G	0.312127	-0.0157725	0.0372675	0.672132	0.319664	0.0185045	7.25728e-67	-0.0493408	0.116618	0.672225	0.793459	20	-0.277912	0.17923	0.951857	0.757363	1.1963	0.952(0.757,1.196)	0.95682
	ENSG00000175104	11	TRAF6	36520199	rs331463	11	36501787	A	T	0.143141	-0.0197322	0.0466449	0.672273	-0.0940786	0.0113083	8.84102e-17	0.209741	0.496448	0.672671	0.615914	20	-0.763297	1.18278	1.23336	0.466127	3.26343	1.233(0.466,3.263)	0.95682
	ENSG00000198168	11	SVIP	22843595	rs7112397	11	22854616	A	G	0.437376	0.0152338	0.0362391	0.674216	-0.153592	0.00973874	4.91083e-56	-0.0991836	0.236028	0.674326	0.827381	20	-0.561798	0.363431	0.905576	0.570183	1.43826	0.906(0.57,1.438)	0.95682
	ENSG00000111199	12	TRPV4	110246051	rs7310287	12	110284465	C	T	0.0656064	-0.0365847	0.0870715	0.674363	0.26746	0.0180553	1.20013e-49	-0.136785	0.32568	0.674486	0.442737	17	-0.775118	0.501548	0.872158	0.46065	1.65128	0.872(0.461,1.651)	0.95682
	ENSG00000151552	4	QDPR	17487870	rs10020773	4	17526682	C	A	0.235586	-0.0180263	0.0429963	0.675031	-0.922868	0.00777375	0	0.0195329	0.0465901	0.675033	0.916629	20	-0.0717837	0.110849	1.01972	0.930732	1.11723	1.02(0.931,1.117)	0.95682
	ENSG00000115414	2	FN1	216263029	rs10932612	2	216215102	C	T	0.375746	0.0151217	0.0360957	0.675265	0.14333	0.00810289	5.11527e-70	0.105502	0.251906	0.675351	0.420105	20	-0.388234	0.599238	1.11127	0.678254	1.82073	1.111(0.678,1.821)	0.95682
	ENSG00000182500	12	ORAI1	122072519	rs7398511	12	122072829	A	C	0.163022	-0.019778	0.0472273	0.675375	0.522817	0.0101016	0	-0.0378297	0.0903354	0.675385	0.584228	20	-0.214887	0.139228	0.962877	0.806633	1.14939	0.963(0.807,1.149)	0.95682
	ENSG00000053918	11	KCNQ1	2668126	rs34847331	11	2501159	C	T	0.459245	0.0147365	0.0351854	0.675346	0.0772208	0.00807192	1.1048e-21	0.190836	0.456084	0.675639	0.915379	20	-0.703089	1.08476	1.21026	0.495054	2.95873	1.21(0.495,2.959)	0.95682
	ENSG00000204525	6	HLA-C	31238216	rs9264547	6	31234742	C	G	0.191849	-0.0181835	0.0436424	0.676936	0.735868	0.00979082	0	-0.0247103	0.0593083	0.676941	0.0536182	20	-0.140955	0.091534	0.975593	0.868529	1.09585	0.976(0.869,1.096)	0.95682
	ENSG00000057294	12	PKP2	32996726	rs7954545	12	33048743	T	C	0.337972	-0.015755	0.0378638	0.67734	0.185031	0.0084213	5.36024e-107	-0.0851476	0.204672	0.677395	0.457956	20	-0.486305	0.31601	0.918377	0.614894	1.37164	0.918(0.615,1.372)	0.95682
	ENSG00000009830	14	POMT2	77764263	rs8177537	14	77787695	T	G	0.12326	0.0256076	0.0617188	0.678209	0.293901	0.0138098	1.66685e-100	0.0871301	0.210039	0.678267	0.0379743	20	-0.324546	0.498807	1.09104	0.722855	1.64675	1.091(0.723,1.647)	0.95682
	ENSG00000010610	12	CD4	6912999	rs7296859	12	6894164	C	G	0.318091	-0.0161632	0.0389813	0.678405	0.236626	0.00860315	1.54668e-166	-0.0683069	0.164756	0.67844	0.704084	17	-0.391229	0.254615	0.933974	0.676226	1.28996	0.934(0.676,1.29)	0.95682
	ENSG00000163956	4	LRPAP1	3521194	rs1794442	4	3516742	A	G	0.328032	0.0160403	0.038794	0.67926	0.262409	0.00975588	2.34917e-159	0.061127	0.147856	0.679296	0.452418	20	-0.228671	0.350925	1.06303	0.79559	1.42038	1.063(0.796,1.42)	0.95682
	ENSG00000140943	16	MBTPS1	84118939	rs3785017	16	84093931	G	A	0.294235	0.0156702	0.0383417	0.68276	0.499102	0.00837452	0	0.0313968	0.0768231	0.682767	0.742991	20	-0.119176	0.18197	1.03189	0.887651	1.19958	1.032(0.888,1.2)	0.960063
	ENSG00000197296	20	FITM2	42935643	rs6073400	20	42934554	G	A	0.228628	0.0186659	0.0459118	0.684332	0.0858339	0.0107639	1.5337e-15	0.217465	0.535587	0.684719	0.0157675	20	-0.832286	1.26722	1.24292	0.435054	3.55095	1.243(0.435,3.551)	0.960063
	ENSG00000138617	15	PARP16	65559877	rs894494	15	65556442	C	T	0.44334	0.0140773	0.0348019	0.685847	-0.379857	0.00768549	0	-0.0370595	0.0916216	0.685857	0.275594	20	-0.216638	0.142519	0.963619	0.805222	1.15317	0.964(0.805,1.153)	0.960063
	ENSG00000140650	16	PMM2	8912934	rs2447927	16	8943277	A	G	0.0347913	-0.0349436	0.0868936	0.687579	0.782054	0.028321	7.5773e-168	-0.0446818	0.111121	0.68761	0.295964	20	-0.262479	0.173115	0.956302	0.769143	1.189	0.956(0.769,1.189)	0.960063
	ENSG00000100350	22	FOXRED2	36893192	rs5756217	22	36891248	T	C	0.111332	0.0214653	0.0536115	0.688873	0.77147	0.0117047	0	0.0278239	0.069494	0.688878	0.841517	20	-0.108384	0.164032	1.02821	0.897283	1.17825	1.028(0.897,1.178)	0.960063
	ENSG00000145050	3	MANF	51424653	rs4453876	3	51228806	C	T	0.0914513	0.0211202	0.0529345	0.689903	0.0988096	0.0140867	2.3094e-12	0.213746	0.536589	0.690378	0.244102	8	-0.837968	1.26546	1.23831	0.432588	3.54472	1.238(0.433,3.545)	0.960063
	ENSG00000252010	2	SCARNA5	234184510	rs10210302	2	234158839	C	T	0.462227	-0.013915	0.0350698	0.69153	0.191685	0.0109811	3.09898e-68	-0.0725929	0.183002	0.691605	0.806922	20	-0.431277	0.286091	0.929979	0.649679	1.33121	0.93(0.65,1.331)	0.960063
	ENSG00000179085	1	DPM3	155112719	rs10157801	1	155120012	G	A	0.407555	-0.0139993	0.0353154	0.691805	-0.0875622	0.00810416	3.27379e-27	0.159878	0.40359	0.692002	0.377237	20	-0.631158	0.950914	1.17337	0.531975	2.58808	1.173(0.532,2.588)	0.960063
	ENSG00000117450	1	PRDX1	45982713	rs17522918	1	45987574	A	C	0.082505	-0.0263674	0.0671768	0.694683	-0.373576	0.0138669	7.431e-160	0.070581	0.17984	0.694714	0.397037	20	-0.281905	0.423067	1.07313	0.754345	1.52664	1.073(0.754,1.527)	0.960063
	ENSG00000184840	5	TMED9	177021142	rs186803	5	177016095	T	C	0.444334	-0.013793	0.0352111	0.695262	-0.464561	0.0082744	0	0.0296904	0.0757961	0.695269	0.659713	20	-0.11887	0.178251	1.03014	0.887923	1.19512	1.03(0.888,1.195)	0.960063
	ENSG00000060566	19	CREB3L3	4163324	rs164632	19	4139849	T	C	0.262425	0.015328	0.0390929	0.69499	-0.0860576	0.00970866	7.71939e-19	-0.178113	0.454708	0.695273	0.981396	20	-1.06934	0.713115	0.836848	0.343235	2.04034	0.837(0.343,2.04)	0.960063
	ENSG00000143933	2	CALM2	47338208	rs61274551	2	47314451	T	C	0.0924453	0.0228614	0.0584056	0.695483	-0.191574	0.0126528	8.71462e-52	-0.119335	0.304974	0.69558	0.0823117	20	-0.717084	0.478414	0.88751	0.488174	1.61351	0.888(0.488,1.614)	0.960063
	ENSG00000163536	3	SERPINI1	167498193	rs9835352	3	167453703	A	G	0.22167	-0.0158233	0.041043	0.699845	-0.141563	0.00942947	6.05373e-51	0.111776	0.290023	0.699939	0.45205	20	-0.456669	0.680221	1.11826	0.63339	1.97431	1.118(0.633,1.974)	0.963253
	ENSG00000130766	1	SESN2	28597520	rs61785968	1	28795027	C	T	0.190855	-0.0190436	0.0496723	0.701434	-0.117403	0.0102491	2.2196e-30	0.162207	0.423328	0.701593	0.599305	20	-0.667516	0.99193	1.1761	0.512981	2.69643	1.176(0.513,2.696)	0.963253
	ENSG00000132906	1	CASP9	15835178	rs6685648	1	15825195	C	T	0.297217	-0.0144052	0.0376444	0.701969	0.334371	0.00838694	0	-0.0430813	0.112588	0.701982	0.936587	20	-0.263754	0.177591	0.957834	0.768163	1.19434	0.958(0.768,1.194)	0.963253
	ENSG00000160087	1	UBE2J2	1199277	rs6685064	1	1211292	T	C	0.0666004	0.025504	0.0676733	0.706271	0.135211	0.0162034	7.14548e-17	0.188623	0.501011	0.706556	0.855399	17	-0.793359	1.1706	1.20759	0.452323	3.22394	1.208(0.452,3.224)	0.963253
	ENSG00000067167	8	TRAM1	71503149	rs34270993	8	71645268	G	C	0.483101	0.0129306	0.0343871	0.706895	-0.207239	0.00787434	1.18415e-152	-0.0623945	0.165947	0.706923	0.835093	15	-0.387651	0.262862	0.939512	0.678649	1.30065	0.94(0.679,1.301)	0.963253
	ENSG00000154229	17	PRKCA	64552807	rs9901697	17	64283468	G	A	0.346918	0.0138066	0.0368124	0.70762	-0.199548	0.00830178	1.14721e-127	-0.0691894	0.184501	0.707654	0.750916	20	-0.430811	0.292433	0.93315	0.649982	1.33968	0.933(0.65,1.34)	0.963253
	ENSG00000177606	1	JUN	59248125	rs2716140	1	59472397	C	A	0.421471	0.0129395	0.034556	0.708069	-0.228224	0.00804141	3.46049e-177	-0.0566967	0.151426	0.708093	0.798319	20	-0.353492	0.240098	0.944881	0.702232	1.27137	0.945(0.702,1.271)	0.963253
	ENSG00000108433	17	GOSR2	45052743	rs2316330	17	45040032	T	G	0.508946	0.0131743	0.0351491	0.707801	0.0551522	0.00795433	4.10259e-12	0.238871	0.638242	0.708207	0.111649	20	-1.01208	1.48983	1.26981	0.363461	4.43632	1.27(0.363,4.436)	0.963253
	ENSG00000133027	17	PEMT	17451949	rs12947517	17	17539278	T	C	0.384692	-0.0141272	0.0377689	0.708372	0.183076	0.0083091	1.38439e-107	-0.0771658	0.206331	0.708412	0.929365	20	-0.481575	0.327243	0.925736	0.61781	1.38714	0.926(0.618,1.387)	0.963253
	ENSG00000116406	1	EDEM3	184691706	rs11808675	1	184666494	T	A	0.408549	0.0131026	0.0355317	0.712308	-0.230291	0.00798946	1.0641e-182	-0.056896	0.154303	0.712331	0.657162	20	-0.35933	0.245538	0.944692	0.698144	1.27831	0.945(0.698,1.278)	0.966986
	ENSG00000118363	11	SPCS2	74675184	rs1315299	11	74598976	G	C	0.240557	-0.0150257	0.0415837	0.717848	-0.182244	0.0173768	9.829e-26	0.0824482	0.228311	0.718009	0.805411	20	-0.365041	0.529938	1.08594	0.694168	1.69883	1.086(0.694,1.699)	0.968486
	ENSG00000140564	15	FURIN	91419255	rs372098	15	91365165	T	C	0.395626	0.0130753	0.0362769	0.718526	-0.178141	0.00828326	1.36216e-102	-0.0733982	0.20367	0.718564	0.232224	20	-0.472591	0.325795	0.929231	0.623385	1.38513	0.929(0.623,1.385)	0.968486
	ENSG00000158604	7	TMED4	44619689	rs217371	7	44613103	G	A	0.4334	-0.0123971	0.0345373	0.719635	-0.317495	0.00785125	0	0.0390464	0.108785	0.719645	0.926016	20	-0.174172	0.252265	1.03982	0.840152	1.28694	1.04(0.84,1.287)	0.968486
	ENSG00000099203	19	TMED1	10945054	rs7253965	19	10683477	A	G	0.0407555	0.0295194	0.0825606	0.720681	-0.516253	0.0210722	1.50643e-132	-0.0571802	0.15994	0.72071	0.687557	20	-0.370663	0.256302	0.944424	0.690277	1.29214	0.944(0.69,1.292)	0.968486
	ENSG00000106113	7	CRHR2	30715972	rs1468402	7	30668882	G	A	0.352883	0.0126874	0.0356482	0.721911	0.116356	0.00857148	5.64976e-42	0.109039	0.306477	0.722002	0.21738	20	-0.491656	0.709734	1.11521	0.611613	2.03345	1.115(0.612,2.033)	0.968486
	ENSG00000166224	10	SGPL1	72608323	rs11591712	10	72630329	T	A	0.0516899	-0.02531	0.071339	0.72275	0.714676	0.0167799	0	-0.0354147	0.0998235	0.722759	0.997192	20	-0.231069	0.160239	0.965205	0.793685	1.17379	0.965(0.794,1.174)	0.968486
	ENSG00000087470	12	DNM1L	32865310	rs3600	12	32896944	T	C	0.136183	-0.0187018	0.0528831	0.723606	-0.229524	0.0127091	6.6061e-73	0.0814806	0.230447	0.723657	0.183037	20	-0.370196	0.533157	1.08489	0.690599	1.7043	1.085(0.691,1.704)	0.968486
	ENSG00000175567	11	UCP2	73690032	rs643064	11	73684715	T	C	0.133201	0.0174147	0.0493222	0.724028	0.583099	0.0107345	0	0.0298658	0.0845881	0.724033	0.91503	20	-0.135927	0.195658	1.03032	0.872906	1.21611	1.03(0.873,1.216)	0.968486
	ENSG00000160678	1	S100A1	153602457	rs28510471	1	153609886	C	G	0.475149	0.0125521	0.0357361	0.725406	0.16317	0.00875037	1.33072e-77	0.0769265	0.219051	0.725452	0.78093	20	-0.352413	0.506266	1.07996	0.702989	1.65909	1.08(0.703,1.659)	0.968486
	ENSG00000103429	16	BFAR	14744882	rs72546339	16	14766204	T	G	0.0477137	-0.0405657	0.115784	0.726071	-0.207728	0.0195402	2.14269e-26	0.195282	0.557683	0.726213	0.0131008	19	-0.897777	1.28834	1.21565	0.407475	3.62676	1.216(0.407,3.627)	0.968486
	ENSG00000142185	21	TRPM2	45816505	rs2838555	21	45785478	C	T	0.181909	0.0150135	0.0434777	0.729858	0.206096	0.00980626	4.60451e-98	0.072847	0.210987	0.729893	0.540203	20	-0.340688	0.486382	1.07557	0.711281	1.62642	1.076(0.711,1.626)	0.968486
	ENSG00000077232	2	DNAJC10	183612666	rs825660	2	183597318	A	G	0.349901	-0.0124854	0.0364334	0.73183	-0.188569	0.00825869	2.16626e-115	0.0662114	0.193232	0.731859	0.734595	20	-0.312523	0.444946	1.06845	0.731599	1.56041	1.068(0.732,1.56)	0.968486
	ENSG00000184304	14	PRKD1	30353395	rs11847351	14	30314078	A	G	0.329026	0.012389	0.036232	0.7324	0.325795	0.00828535	0	0.038027	0.111215	0.73241	0.942411	20	-0.179954	0.256008	1.03876	0.835308	1.29176	1.039(0.835,1.292)	0.968486
	ENSG00000134825	11	TMEM258	61558354	rs174538	11	61560081	A	G	0.313121	0.0129038	0.0378323	0.733045	0.328118	0.00939484	3.07151e-267	0.0393266	0.115307	0.733058	0.316857	20	-0.186675	0.265328	1.04011	0.829713	1.30386	1.04(0.83,1.304)	0.968486
	ENSG00000109971	11	HSPA8	122931067	rs11218941	11	122932409	G	A	0.171968	0.0149916	0.0439903	0.733259	0.112495	0.00998376	1.89241e-29	0.133265	0.391221	0.733376	0.626133	20	-0.633528	0.900058	1.14255	0.530716	2.45975	1.143(0.531,2.46)	0.968486
	ENSG00000099958	22	DERL3	24179002	rs2070464	22	24183875	G	A	0.379722	0.0120909	0.0360138	0.737075	-0.128174	0.00881464	6.66122e-48	-0.094332	0.281052	0.737143	0.375507	20	-0.645194	0.45653	0.909981	0.524561	1.57859	0.91(0.525,1.579)	0.968486
	ENSG00000119777	2	TMEM214	27260170	rs11126857	2	27297757	A	G	0.380716	-0.0117714	0.0350533	0.737011	-0.0481395	0.00816671	3.7559e-09	0.244527	0.729341	0.737421	0.222818	20	-1.18498	1.67404	1.27702	0.305752	5.33365	1.277(0.306,5.334)	0.968486
	ENSG00000102595	13	UGGT2	96579785	rs2389530	13	96550754	G	A	0.340954	-0.0119571	0.0357281	0.737874	0.271008	0.00822801	6.4519e-238	-0.044121	0.131841	0.737887	0.538798	20	-0.302529	0.214287	0.956838	0.738947	1.23898	0.957(0.739,1.239)	0.968486
	ENSG00000104412	8	EMC2	109477487	rs957716	8	109576060	C	G	0.357853	0.0125	0.0375313	0.739093	-0.142911	0.0091175	2.26351e-55	-0.0874668	0.262679	0.73915	0.898329	20	-0.602318	0.427384	0.916249	0.547541	1.53324	0.916(0.548,1.533)	0.968486
	ENSG00000108424	17	KPNB1	45744856	rs78642018	17	45673653	C	A	0.0536779	0.0254784	0.0767799	0.740012	-0.163896	0.0246305	2.8485e-11	-0.155454	0.469049	0.740324	0.951155	20	-1.07479	0.763882	0.856026	0.341369	2.14659	0.856(0.341,2.147)	0.968486
	ENSG00000148719	10	DNAJB12	74103788	rs9416018	10	74100642	G	A	0.420477	0.0122668	0.0373496	0.742586	0.305178	0.00826003	8.31986e-299	0.0401953	0.122391	0.742596	0.56766	20	-0.199691	0.280082	1.04101	0.818984	1.32324	1.041(0.819,1.323)	0.968486
	ENSG00000112062	6	MAPK14	36037250	rs9380547	6	36083810	T	A	0.167992	-0.0142566	0.0434823	0.743008	0.202765	0.00984247	2.68827e-94	-0.0703112	0.214474	0.74304	0.989644	20	-0.49068	0.350058	0.932104	0.61221	1.41915	0.932(0.612,1.419)	0.968486
	ENSG00000115694	2	STK25	242440617	rs886809	2	242397460	G	A	0.228628	0.0142041	0.0433928	0.743412	-0.114978	0.00960387	4.98131e-33	-0.123538	0.377544	0.743505	0.708185	20	-0.863524	0.616448	0.883788	0.421673	1.85234	0.884(0.422,1.852)	0.968486
	ENSG00000185933	10	CALHM1	105215894	rs3014192	10	105225201	T	C	0.482107	0.0111552	0.034257	0.744702	-0.064592	0.00800139	6.88169e-16	-0.172702	0.530791	0.744903	0.399721	20	-1.21305	0.867648	0.841388	0.297288	2.3813	0.841(0.297,2.381)	0.968486
	ENSG00000103222	16	ABCC1	16140182	rs504348	16	16043174	C	G	0.177932	-0.0161978	0.0498647	0.745306	-0.274405	0.0109217	2.66535e-139	0.0590288	0.181735	0.745327	0.149562	20	-0.297172	0.415229	1.06081	0.742916	1.51472	1.061(0.743,1.515)	0.968486
	ENSG00000181027	19	FKRP	47264774	rs3848528	19	47218101	G	T	0.427435	0.0112399	0.0349826	0.747984	0.372902	0.00785925	0	0.0301416	0.0938138	0.747989	0.667431	20	-0.153733	0.214017	1.0306	0.857501	1.23864	1.031(0.858,1.239)	0.968486
	ENSG00000104691	8	UBXN8	30607143	rs1002149	8	30585738	T	G	0.156064	-0.0143612	0.0447588	0.748319	0.0640968	0.0102755	4.43771e-10	-0.224054	0.699223	0.74864	0.481814	20	-1.59453	1.14642	0.799272	0.203004	3.14692	0.799(0.203,3.147)	0.968486
	ENSG00000029534	8	ANK1	41632509	rs4736819	8	41509915	C	T	0.462227	0.0110548	0.0345171	0.748764	-0.168	0.00793397	1.63074e-99	-0.0658022	0.205482	0.748792	0.613003	20	-0.468547	0.336943	0.936316	0.625911	1.40066	0.936(0.626,1.401)	0.968486
	ENSG00000115138	2	POMC	25387747	rs3754861	2	25393722	C	A	0.0785288	-0.0261343	0.0818418	0.749479	0.582229	0.0157125	1.48097e-300	-0.0448866	0.140572	0.749488	0.558934	20	-0.320408	0.230635	0.956106	0.725853	1.2594	0.956(0.726,1.259)	0.968486
	ENSG00000140464	15	PML	74313583	rs10851868	15	74316299	T	G	0.406561	0.011105	0.0347945	0.749606	0.206873	0.00806183	3.20344e-145	0.0536801	0.168205	0.749625	0.659228	20	-0.276002	0.383362	1.05515	0.758812	1.46721	1.055(0.759,1.467)	0.968486
	ENSG00000112715	6	VEGFA	43746072	rs11965885	6	43693094	G	T	0.414513	0.0113776	0.0356858	0.749858	0.236327	0.0080003	8.8799e-192	0.0481434	0.15101	0.749872	0.043005	20	-0.247836	0.344123	1.04932	0.780488	1.41075	1.049(0.78,1.411)	0.968486
	ENSG00000143578	1	CREB3L4	153943424	rs11264736	1	153939130	T	C	0.477137	0.0110141	0.0350071	0.753046	0.160064	0.0078962	2.31896e-91	0.068811	0.218734	0.753074	0.956696	20	-0.359908	0.49753	1.07123	0.697741	1.64465	1.071(0.698,1.645)	0.971101
	ENSG00000130529	19	TRPM4	49688045	rs12151119	19	49700971	A	G	0.335984	0.0121847	0.0389948	0.754683	0.263865	0.0089848	1.41188e-189	0.046178	0.147792	0.754696	0.982678	20	-0.243494	0.33585	1.04726	0.783884	1.39913	1.047(0.784,1.399)	0.971671
	ENSG00000112425	6	EPM2A	145939939	rs450973	6	145863065	A	C	0.481113	-0.0106396	0.0343118	0.756497	-0.245567	0.00793489	2.72838e-210	0.0433266	0.139732	0.756509	0.805671	11	-0.230548	0.317201	1.04428	0.794098	1.37328	1.044(0.794,1.373)	0.972165
	ENSG00000165731	10	RET	43599137	rs2503841	10	43675721	C	T	0.236581	-0.0123564	0.0399997	0.757389	-0.137063	0.00917325	1.76679e-50	0.0901509	0.291897	0.757439	0.925511	20	-0.481967	0.662269	1.09434	0.617567	1.93919	1.094(0.618,1.939)	0.972165
	ENSG00000141349	17	G6PC3	42150906	rs1684660	17	42108351	T	A	0.479125	0.0105147	0.0345067	0.760583	0.17944	0.00794518	6.11362e-113	0.0585973	0.19232	0.760605	0.677199	20	-0.31835	0.435545	1.06035	0.727348	1.5458	1.06(0.727,1.546)	0.973198
	ENSG00000189403	13	HMGB1	31112309	rs7986681	13	30994430	C	A	0.40159	0.0118464	0.0393196	0.763197	0.0702902	0.0089585	4.28829e-15	0.168536	0.559802	0.763366	0.914255	20	-0.928676	1.26575	1.18357	0.395076	3.54574	1.184(0.395,3.546)	0.973198
	ENSG00000239732	3	TLR9	52264139	rs6795333	3	52459843	T	C	0.0586481	0.0244714	0.0814873	0.763941	-0.11365	0.018795	1.4775e-09	-0.215323	0.717888	0.764223	0.340871	6	-1.62238	1.19174	0.806281	0.197428	3.2928	0.806(0.197,3.293)	0.973198
	ENSG00000008952	3	SEC62	169700292	rs6766761	3	169695883	C	A	0.203777	-0.0135538	0.045412	0.765349	-0.151678	0.0115907	3.94874e-39	0.0893593	0.299475	0.765408	0.872141	20	-0.497612	0.67633	1.09347	0.607981	1.96665	1.093(0.608,1.967)	0.973198
	ENSG00000131748	17	STARD3	37806527	rs907087	17	37828787	G	A	0.311133	-0.0113966	0.0381932	0.765404	0.108215	0.00863759	5.2205e-36	-0.105314	0.353038	0.765469	0.514326	20	-0.797268	0.58664	0.900042	0.450558	1.79794	0.9(0.451,1.798)	0.973198
	ENSG00000054116	1	TRAPPC3	36608635	rs12033825	1	36600311	C	T	0.252485	-0.0118998	0.040131	0.76683	0.0992427	0.00922107	5.16909e-27	-0.119906	0.404525	0.766916	0.460076	20	-0.912775	0.672963	0.887004	0.401409	1.96004	0.887(0.401,1.96)	0.973198
	ENSG00000205155	19	PSENEN	36236960	rs3885795	19	36190828	A	G	0.121272	0.0157025	0.0530348	0.76717	-0.115343	0.0117176	7.30492e-23	-0.136137	0.460007	0.767272	0.707203	18	-1.03775	0.765477	0.872723	0.354251	2.15002	0.873(0.354,2.15)	0.973198
	ENSG00000188906	12	LRRK2	40676816	rs4363681	12	40554055	T	C	0.450298	0.0101151	0.0344106	0.768794	-0.333585	0.00849744	0	-0.0303225	0.103157	0.7688	0.576558	20	-0.23251	0.171865	0.970133	0.792542	1.18752	0.97(0.793,1.188)	0.973198
	ENSG00000197912	16	SPG7	89590750	rs4785686	16	89587871	C	A	0.492048	-0.0103648	0.03527	0.768857	0.191279	0.00794624	4.96005e-128	-0.0541868	0.184404	0.768874	0.92434	20	-0.415619	0.307245	0.947255	0.659932	1.35967	0.947(0.66,1.36)	0.973198
	ENSG00000118705	20	RPN2	35838417	rs1744769	20	35769592	T	C	0.199801	-0.0125925	0.04317	0.77052	-0.136351	0.0146324	1.18109e-20	0.0923537	0.316765	0.770629	0.458919	20	-0.528506	0.713213	1.09675	0.589485	2.04054	1.097(0.589,2.041)	0.973503
	ENSG00000168476	8	REEP4	21997498	rs58969219	8	21992947	C	T	0.188867	0.0135811	0.0468734	0.772015	0.508892	0.0108808	0	0.0266876	0.0921105	0.772019	0.0997239	20	-0.153849	0.207224	1.02705	0.857401	1.23026	1.027(0.857,1.23)	0.973503
	ENSG00000102580	13	DNAJC3	96388318	rs3099358	13	96480538	C	T	0.39165	-0.0100544	0.0349002	0.773278	0.0887585	0.00812539	8.89004e-28	-0.113278	0.393341	0.773354	0.507836	20	-0.884226	0.65767	0.892902	0.413034	1.93029	0.893(0.413,1.93)	0.973503
	ENSG00000090339	19	ICAM1	10389401	rs281437	19	10397238	T	C	0.275348	-0.0114692	0.039908	0.773813	0.181679	0.00996486	2.87611e-74	-0.0631286	0.219689	0.773841	0.452639	20	-0.493719	0.367462	0.938823	0.610352	1.44406	0.939(0.61,1.444)	0.973503
	ENSG00000186951	22	PPARA	46593038	rs129600	22	46557161	G	A	0.276342	-0.0106992	0.037629	0.776155	-0.0785087	0.00929031	2.8981e-17	0.13628	0.479569	0.776279	0.343641	20	-0.803675	1.07624	1.146	0.447681	2.93361	1.146(0.448,2.934)	0.974494
	ENSG00000204305	6	AGER	32150423	rs693906	6	31835164	C	G	0.11332	-0.014329	0.0507154	0.777532	0.196774	0.0175585	3.77598e-29	-0.0728194	0.257816	0.7776	0.419571	20	-0.578139	0.4325	0.929769	0.560941	1.54111	0.93(0.561,1.541)	0.974494
	ENSG00000100644	14	HIF1A	62188603	rs111522409	14	62150735	G	A	0.055666	0.02173	0.0771273	0.778142	-0.304874	0.019251	1.7342e-56	-0.0712752	0.253021	0.778176	0.886435	20	-0.567196	0.424646	0.931206	0.567113	1.52905	0.931(0.567,1.529)	0.974494
	ENSG00000057593	13	F7	113767550	rs561241	13	113760034	C	T	0.120278	0.0148578	0.0532449	0.78021	-0.0936977	0.0143598	6.80021e-11	-0.158571	0.568782	0.780405	0.415566	12	-1.27338	0.956242	0.853362	0.279883	2.6019	0.853(0.28,2.602)	0.975803
	ENSG00000187566	6	NHLRC1	18121784	rs4074443	6	18106602	A	G	0.488072	-0.00996804	0.0363734	0.784048	0.0784725	0.00794755	5.40756e-23	-0.127026	0.463696	0.784129	0.569257	20	-1.03587	0.781818	0.880711	0.354917	2.18544	0.881(0.355,2.185)	0.976156
	ENSG00000088247	19	KHSRP	6419082	rs8107767	19	6410324	T	C	0.10835	-0.0177769	0.0651488	0.784957	-0.10836	0.0151956	9.96422e-13	0.164054	0.601667	0.78511	0.0822834	20	-1.01521	1.34332	1.17828	0.362325	3.83175	1.178(0.362,3.832)	0.976156
	ENSG00000034152	17	MAP2K3	21203268	rs8074866	17	21190527	T	C	0.336978	0.0108383	0.0400335	0.786598	-0.0647512	0.00851609	2.88451e-14	-0.167384	0.618658	0.78673	0.502294	11	-1.37995	1.04519	0.845875	0.25159	2.84393	0.846(0.252,2.844)	0.976156
	ENSG00000144867	3	SRPRB	133523746	rs6773354	3	133541774	T	C	0.171968	-0.0128355	0.047729	0.787988	-0.540882	0.010643	0	0.0237306	0.0882441	0.787991	0.741516	20	-0.149228	0.196689	1.02401	0.861373	1.21737	1.024(0.861,1.217)	0.976156
	ENSG00000135679	12	MDM2	69220585	rs7304105	12	69181478	A	G	0.208748	0.0118893	0.0443552	0.788663	-0.528707	0.00962585	0	-0.0224875	0.0838948	0.788665	0.956418	20	-0.186921	0.141946	0.977763	0.829509	1.15251	0.978(0.83,1.153)	0.976156
	ENSG00000148660	10	CAMK2G	75603301	rs56756262	10	75589493	G	A	0.196819	0.0117414	0.0444666	0.791741	0.0850541	0.0102655	1.1771e-16	0.138046	0.523069	0.791845	0.479729	20	-0.887169	1.16326	1.14803	0.41182	3.20035	1.148(0.412,3.2)	0.976156
	ENSG00000184381	22	PLA2G6	38554599	rs2235347	22	38522887	G	A	0.459245	-0.00947592	0.0359169	0.791912	0.169044	0.00795181	2.74489e-100	-0.0560558	0.212487	0.791927	0.904794	20	-0.47253	0.360419	0.945486	0.623423	1.43393	0.945(0.623,1.434)	0.976156
	ENSG00000204390	6	HSPA1L	31780416	rs2075799	6	31778529	T	C	0.0874751	0.0161471	0.0612272	0.791992	-0.387909	0.0246852	1.20898e-55	-0.041626	0.157861	0.792021	0.667619	20	-0.351034	0.267782	0.959228	0.70396	1.30706	0.959(0.704,1.307)	0.976156
	ENSG00000028116	2	VRK2	58260920	rs3732136	2	58387000	T	C	0.264414	-0.0102029	0.0387891	0.792524	-0.294136	0.00953103	4.00007e-209	0.0346876	0.131879	0.792531	0.143132	20	-0.223795	0.29317	1.0353	0.799479	1.34067	1.035(0.799,1.341)	0.976156
	ENSG00000134001	14	EIF2S1	67839973	rs28578660	14	67673031	G	A	0.0576541	-0.0204501	0.0777271	0.792473	-0.18732	0.0176096	1.99621e-26	0.109172	0.41507	0.792535	0.753147	20	-0.704365	0.922709	1.11535	0.494422	2.5161	1.115(0.494,2.516)	0.976156
	ENSG00000151923	10	TIAL1	121345370	rs3816145	10	121347329	C	T	0.196819	0.0106265	0.0406365	0.793706	-0.0892926	0.0091984	2.804e-22	-0.119007	0.455258	0.79378	0.591431	20	-1.01131	0.773299	0.887802	0.363741	2.1669	0.888(0.364,2.167)	0.97623
	ENSG00000082996	3	RNF13	149605210	rs12494028	3	149533228	A	G	0.26839	-0.0102391	0.0404975	0.800398	0.414949	0.00898873	0	-0.0246755	0.0975976	0.800401	0.761218	20	-0.215967	0.166616	0.975626	0.805762	1.1813	0.976(0.806,1.181)	0.982906
	ENSG00000136247	7	ZDHHC4	6623035	rs11559147	7	6617247	C	G	0.259443	0.0103724	0.0414276	0.802298	-0.543562	0.00907205	0	-0.0190822	0.0762157	0.8023	0.879453	20	-0.168465	0.130301	0.981099	0.844961	1.13917	0.981(0.845,1.139)	0.983773
	ENSG00000106397	7	PLOD3	100855479	rs11769624	7	100861452	C	T	0.250497	-0.0102606	0.0415123	0.804775	0.0631085	0.00960906	5.11329e-11	-0.162588	0.658258	0.804911	0.172517	20	-1.45277	1.1276	0.849941	0.233921	3.08823	0.85(0.234,3.088)	0.983994
	ENSG00000168538	4	TRAPPC11	184607582	rs7684260	4	184597363	T	C	0.389662	-0.00857502	0.0349184	0.806013	-0.129873	0.00895207	1.08452e-47	0.0660262	0.268904	0.80604	0.195501	20	-0.461026	0.593078	1.06825	0.630637	1.80955	1.068(0.631,1.81)	0.983994
	ENSG00000071537	14	SEL1L	81969049	rs2236179	14	81953242	G	A	0.474155	0.00830837	0.0341528	0.807796	0.0769654	0.00794571	3.4446e-22	0.107949	0.443882	0.807855	0.104195	20	-0.76206	0.977958	1.11399	0.466704	2.65902	1.114(0.467,2.659)	0.983994
	ENSG00000108953	17	YWHAE	1275619	rs62089574	17	1301896	C	T	0.0805169	0.0179159	0.0736416	0.807785	-0.0976388	0.0161616	1.5278e-09	-0.183491	0.754836	0.807937	0.533594	16	-1.66297	1.29599	0.832359	0.189575	3.6546	0.832(0.19,3.655)	0.983994
	ENSG00000180957	22	PITPNB	28281889	rs5752663	22	28339350	T	C	0.05666	0.0184664	0.0761642	0.808427	0.389781	0.02555	1.511e-52	0.0473765	0.195428	0.808451	0.296551	20	-0.335662	0.430415	1.04852	0.714864	1.5379	1.049(0.715,1.538)	0.983994
	ENSG00000198668	14	CALM1	90868725	rs7150626	14	90858484	C	T	0.204771	-0.0101267	0.0425842	0.812034	0.235472	0.00947816	3.03229e-136	-0.0430058	0.180855	0.812042	0.0762764	20	-0.397482	0.31147	0.957906	0.67201	1.36543	0.958(0.672,1.365)	0.985898
	ENSG00000075142	7	SRI	87845370	rs1063964	7	87835469	A	G	0.305169	-0.00872504	0.0368373	0.81277	0.171616	0.00854704	1.12639e-89	-0.0508405	0.214665	0.812783	0.797276	20	-0.471584	0.369903	0.95043	0.624013	1.44759	0.95(0.624,1.448)	0.985898
	ENSG00000104969	19	SGTA	2769040	rs6510701	19	2775723	C	T	0.28827	0.0137723	0.0584044	0.81358	-0.160543	0.0112512	3.4144e-46	-0.085786	0.363843	0.813605	0.726948	20	-0.798918	0.627346	0.917791	0.449815	1.87263	0.918(0.45,1.873)	0.985898
	ENSG00000149311	11	ATM	108166520	rs2640787	11	108410970	G	A	0.166998	0.0106779	0.0460581	0.816666	-0.0648707	0.0104445	5.26479e-10	-0.164603	0.710493	0.816791	0.231353	20	-1.55717	1.22796	0.84823	0.210732	3.41427	0.848(0.211,3.414)	0.988305
	ENSG00000153029	1	MR1	181017070	rs2331994	1	181023708	T	C	0.276342	0.00890667	0.0392609	0.820534	-0.270065	0.00884985	1.584e-204	-0.0329798	0.14538	0.820538	0.684914	20	-0.317925	0.251965	0.967558	0.727658	1.28655	0.968(0.728,1.287)	0.990235
	ENSG00000154277	4	UCHL1	41264451	rs13102133	4	41215837	G	C	0.166998	-0.0104706	0.0463204	0.821164	0.0971314	0.011143	2.86181e-18	-0.107798	0.477044	0.821223	0.660004	20	-1.0428	0.827208	0.897809	0.352465	2.28693	0.898(0.352,2.287)	0.990235
	ENSG00000196655	11	TRAPPC4	118892653	rs569	11	118894287	G	A	0.227634	0.00960501	0.0426917	0.821991	0.861619	0.00837898	0	0.0111476	0.0495484	0.821991	0.634192	20	-0.0859673	0.108262	1.01121	0.917624	1.11434	1.011(0.918,1.114)	0.990235
	ENSG00000132002	19	DNAJB1	14633082	rs10411738	19	14625170	T	C	0.148111	0.0114211	0.0512835	0.823765	0.230559	0.0169406	3.50202e-42	0.0495365	0.222461	0.823789	0.585665	20	-0.386487	0.48556	1.05078	0.67944	1.62508	1.051(0.679,1.625)	0.990952
	ENSG00000070831	1	CDC42	22399278	rs2473290	1	22358457	T	C	0.214712	-0.00860525	0.0402344	0.830642	0.3435	0.00908022	0	-0.0250517	0.117133	0.830645	0.450405	20	-0.254632	0.204529	0.975259	0.775201	1.22695	0.975(0.775,1.227)	0.99234
	ENSG00000172269	11	DPAGT1	118973127	rs649870	11	118971251	G	A	0.463221	0.00744666	0.0351243	0.8321	0.177279	0.00795509	5.16561e-110	0.0420053	0.198139	0.832108	0.713891	20	-0.346347	0.430358	1.0429	0.707267	1.53781	1.043(0.707,1.538)	0.99234
	ENSG00000136238	7	RAC1	6428881	rs836528	7	6468073	C	G	0.134195	0.0109806	0.0518123	0.832162	0.30031	0.0128415	5.96101e-121	0.0365641	0.172537	0.832169	0.917193	20	-0.301608	0.374737	1.03724	0.739628	1.45461	1.037(0.74,1.455)	0.99234
	ENSG00000168710	1	AHCYL1	110546832	rs3754444	1	110534462	A	G	0.16501	0.00924407	0.0441577	0.834181	-0.126236	0.0100747	5.11633e-36	-0.0732288	0.349853	0.834204	0.361385	20	-0.758941	0.612483	0.929388	0.468162	1.84501	0.929(0.468,1.845)	0.99234
	ENSG00000259384	17	GH1	61995369	rs2282677	17	61986539	C	T	0.419483	0.00776884	0.0372928	0.834979	-0.0823701	0.0132624	5.27159e-10	-0.0943163	0.453002	0.835071	0.123313	20	-0.9822	0.793568	0.909995	0.374486	2.21127	0.91(0.374,2.211)	0.99234
	ENSG00000204516	6	MICB	31470779	rs28732167	6	32031904	A	G	0.055666	-0.0164325	0.0803339	0.837922	-0.851999	0.0282081	2.0987e-200	0.019287	0.0942909	0.837925	0.446334	20	-0.165523	0.204097	1.01947	0.84745	1.22642	1.019(0.847,1.226)	0.99234
	ENSG00000143727	2	ACP1	271211	rs300751	2	209063	C	A	0.487078	-0.00734542	0.0359469	0.838087	-0.115915	0.00796229	5.19556e-48	0.063369	0.310145	0.838103	0.551861	20	-0.544515	0.671253	1.06542	0.580123	1.95669	1.065(0.58,1.957)	0.99234
	ENSG00000010704	6	HFE	26093040	rs4291093	6	26081724	G	A	0.369781	0.00737207	0.0361416	0.838371	-0.0488651	0.00830728	4.0485e-09	-0.150866	0.740065	0.838467	0.713228	20	-1.60139	1.29966	0.859963	0.201615	3.66805	0.86(0.202,3.668)	0.99234
	ENSG00000197442	6	MAP3K5	136995920	rs6899530	6	137110188	T	C	0.398608	-0.00718369	0.0355306	0.839773	-0.478295	0.0115508	0	0.0150194	0.0742868	0.839775	0.776643	20	-0.130583	0.160622	1.01513	0.877584	1.17424	1.015(0.878,1.174)	0.99234
	ENSG00000168282	14	MGAT2	50088843	rs12879350	14	50102673	T	C	0.242545	-0.00817508	0.040696	0.840791	-0.165214	0.00985116	3.97759e-63	0.0494818	0.246341	0.840802	0.162355	20	-0.433347	0.53231	1.05073	0.648336	1.70286	1.051(0.648,1.703)	0.99234
	ENSG00000188603	16	CLN3	28492439	rs151228	16	28563026	A	G	0.525845	0.00683663	0.0341284	0.84123	0.200622	0.00863085	1.60571e-119	0.0340771	0.170119	0.841235	0.64927	20	-0.299356	0.36751	1.03466	0.741295	1.44413	1.035(0.741,1.444)	0.99234
	ENSG00000110048	11	OSBP	59362744	rs510003	11	59481781	A	G	0.157058	0.011155	0.0557922	0.841528	-0.0617462	0.0109421	1.6711e-08	-0.180659	0.90414	0.841626	0.772231	4	-1.95277	1.59146	0.83472	0.14188	4.91089	0.835(0.142,4.911)	0.99234
	ENSG00000023171	11	GRAMD1B	123447413	rs55837399	11	123330774	T	A	0.197813	-0.0117962	0.0601864	0.844614	0.232414	0.0110686	6.89823e-98	-0.050755	0.258973	0.844621	0.0467749	9	-0.558342	0.456832	0.950512	0.572157	1.57906	0.951(0.572,1.579)	0.99234
	ENSG00000168488	16	ATXN2L	28841457	rs4533290	16	28823755	A	G	0.318091	-0.011666	0.0596634	0.844977	0.0787621	0.0101257	7.34481e-15	-0.148117	0.757754	0.845026	0.942906	20	-1.63331	1.33708	0.86233	0.195281	3.80791	0.862(0.195,3.808)	0.99234
	ENSG00000179295	12	PTPN11	112901936	rs12425405	12	112954137	C	G	0.082505	0.0120062	0.0626301	0.847977	0.250372	0.0235047	1.7066e-26	0.0479533	0.250188	0.848001	0.497039	12	-0.442415	0.538322	1.04912	0.642483	1.71313	1.049(0.642,1.713)	0.99234
	ENSG00000107643	10	MAPK8	49581050	rs3827681	10	49659637	T	C	0.411531	0.00672793	0.0352531	0.848646	-0.231227	0.00791473	1.258e-187	-0.0290966	0.152464	0.848649	0.953955	20	-0.327926	0.269733	0.971323	0.720416	1.30961	0.971(0.72,1.31)	0.99234
	ENSG00000143771	1	CNIH4	224555856	rs10799569	1	224558812	C	G	0.249503	0.00789423	0.0416084	0.849523	-0.462171	0.00937608	0	-0.0170807	0.0900289	0.849524	0.852149	20	-0.193537	0.159376	0.983064	0.824039	1.17278	0.983(0.824,1.173)	0.99234
	ENSG00000162909	1	CAPN2	223926507	rs72747982	1	223851907	T	G	0.0497018	0.0152176	0.0803483	0.849783	-0.233791	0.0182205	1.09649e-37	-0.0650906	0.343714	0.849799	0.60308	10	-0.73877	0.608589	0.936983	0.477701	1.83784	0.937(0.478,1.838)	0.99234
	ENSG00000174780	4	SRP72	57351460	rs66858948	4	57334142	G	C	0.212724	0.0086169	0.0455835	0.850065	-0.332677	0.00993294	6.23969e-246	-0.0259017	0.137023	0.850067	0.555089	20	-0.294467	0.242663	0.974431	0.744929	1.27464	0.974(0.745,1.275)	0.99234
	ENSG00000163874	1	ZC3H12A	37945066	rs6704011	1	37917469	C	G	0.132207	-0.0100647	0.054428	0.853294	0.151577	0.0117829	7.15789e-38	-0.0663997	0.359115	0.853309	0.93433	20	-0.770265	0.637466	0.935757	0.46289	1.89168	0.936(0.463,1.892)	0.99234
	ENSG00000129128	4	SPCS3	177247255	rs12508640	4	177247169	C	G	0.141153	0.00918546	0.0497179	0.853424	-0.244305	0.0117122	1.26281e-96	-0.0375983	0.203515	0.85343	0.730961	20	-0.436488	0.361291	0.9631	0.646302	1.43518	0.963(0.646,1.435)	0.99234
	ENSG00000143742	1	SRP9	225971849	rs3820231	1	225970284	A	G	0.215706	0.00734157	0.0406085	0.856533	-0.15348	0.0153471	1.5148e-23	-0.0478341	0.264628	0.856556	0.722762	20	-0.566505	0.470837	0.953292	0.567505	1.60133	0.953(0.568,1.601)	0.99234
	ENSG00000142798	1	HSPG2	22206264	rs11587857	1	22260308	C	T	0.230616	-0.00728879	0.0407609	0.858081	0.392613	0.0167367	1.09019e-121	-0.0185648	0.103823	0.858085	0.414197	20	-0.222058	0.184928	0.981606	0.800869	1.20313	0.982(0.801,1.203)	0.99234
	ENSG00000204463	6	BAG6	31613643	rs707939	6	31726688	A	C	0.368787	-0.0061886	0.0350988	0.860043	0.140105	0.0160237	2.25801e-18	-0.0441712	0.250569	0.860071	0.517128	20	-0.535286	0.446944	0.95679	0.585502	1.56353	0.957(0.586,1.564)	0.99234
	ENSG00000114745	3	GORASP1	39144002	rs4676592	3	38864937	T	C	0.134195	-0.00852909	0.0487475	0.861108	-0.105066	0.0109702	9.95188e-22	0.0811786	0.464049	0.861131	0.288575	20	-0.828357	0.990715	1.08456	0.436766	2.69316	1.085(0.437,2.693)	0.99234
	ENSG00000023318	9	ERP44	102801391	rs9408993	9	102877633	G	A	0.446322	-0.00603291	0.0346017	0.861588	-0.0976487	0.00847042	9.5111e-31	0.0617818	0.354389	0.861604	0.695256	20	-0.632821	0.756384	1.06373	0.531092	2.13056	1.064(0.531,2.131)	0.99234
	ENSG00000161671	19	EMC10	50983132	rs1673018	19	50987694	A	G	0.337972	-0.00632028	0.0363775	0.862069	-0.116963	0.00933973	5.57418e-36	0.0540364	0.311046	0.862082	0.0208492	20	-0.555614	0.663687	1.05552	0.57372	1.94194	1.056(0.574,1.942)	0.99234
	ENSG00000180509	21	KCNE1	35851780	rs13050900	21	35872021	T	C	0.296223	0.00629977	0.0370804	0.865093	-0.295709	0.00850251	5.05331e-265	-0.021304	0.125397	0.865095	0.819517	20	-0.267082	0.224474	0.978921	0.76561	1.25166	0.979(0.766,1.252)	0.99234
	ENSG00000157017	3	GHRL	10330995	rs57221010	3	10336654	G	T	0.261431	-0.00653815	0.0385979	0.865489	-0.221448	0.0130074	5.37752e-65	0.0295245	0.174307	0.865496	0.218363	20	-0.312117	0.371166	1.02996	0.731896	1.44942	1.03(0.732,1.449)	0.99234
	ENSG00000109133	4	TMEM33	41949863	rs7670980	4	41910384	T	G	0.116302	-0.00935771	0.0553928	0.865849	0.194231	0.0137217	1.7394e-45	-0.0481783	0.285211	0.865858	0.0434874	20	-0.607192	0.510835	0.952964	0.544879	1.66668	0.953(0.545,1.667)	0.99234
	ENSG00000050130	14	JKAMP	59961644	rs113062316	14	59971334	C	T	0.0586481	-0.0113118	0.0670475	0.866022	0.671952	0.016354	0	-0.0168342	0.0997811	0.866023	0.081151	20	-0.212405	0.178737	0.983307	0.808637	1.19571	0.983(0.809,1.196)	0.99234
	ENSG00000015475	22	BID	18237221	rs3788279	22	18200386	A	G	0.510934	-0.00583803	0.0346265	0.866111	0.115453	0.00794574	7.79925e-48	-0.0505663	0.299938	0.86612	0.456919	20	-0.638445	0.537312	0.950691	0.528113	1.7114	0.951(0.528,1.711)	0.99234
	ENSG00000168036	3	CTNNB1	41268957	rs1722846	3	41233889	T	C	0.436382	0.00593633	0.0352555	0.866284	-0.265521	0.00786378	6.41831e-250	-0.0223572	0.13278	0.866286	0.708053	20	-0.282606	0.237892	0.977891	0.753817	1.26857	0.978(0.754,1.269)	0.99234
	ENSG00000109819	4	PPARGC1A	23831188	rs74893741	4	23867367	G	A	0.178926	-0.00770087	0.0463689	0.868095	0.499826	0.0096468	0	-0.0154071	0.0927706	0.868096	0.443818	20	-0.197237	0.166423	0.984711	0.820996	1.18107	0.985(0.821,1.181)	0.99234
	ENSG00000164308	5	ERAP2	96233531	rs2910686	5	96252589	C	T	0.426441	0.00575712	0.0352199	0.870155	1.0119	0.00618304	0	0.00568942	0.0348058	0.870155	0.000349132	20	-0.0625299	0.0739088	1.00571	0.939385	1.07671	1.006(0.939,1.077)	0.99234
	ENSG00000173039	11	RELA	65425816	rs4645917	11	65481640	A	G	0.11332	0.00893053	0.0560505	0.873409	0.0804386	0.0136138	3.4503e-09	0.111023	0.697065	0.873455	0.195022	20	-1.25522	1.47727	1.11742	0.285012	4.38097	1.117(0.285,4.381)	0.99234
	ENSG00000026103	10	FAS	90762978	rs4064	10	90751380	C	G	0.323062	0.00577036	0.0362882	0.873657	-0.398263	0.00809591	0	-0.0144888	0.0911166	0.873658	0.0722073	20	-0.193077	0.1641	0.985616	0.824418	1.17833	0.986(0.824,1.178)	0.99234
	ENSG00000129250	17	KIF1C	4916469	rs8075365	17	4824853	G	T	0.124254	-0.00812405	0.051221	0.873978	0.149357	0.0115833	4.85268e-38	-0.0543935	0.34297	0.873987	0.511831	20	-0.726615	0.617828	0.947059	0.483543	1.85489	0.947(0.484,1.855)	0.99234
	ENSG00000167004	15	PDIA3	44052033	rs7174732	15	44038463	C	A	0.282306	0.00634926	0.0400727	0.874107	-0.117301	0.00967638	8.03718e-34	-0.0541279	0.341652	0.874118	0.16223	20	-0.723766	0.61551	0.947311	0.484923	1.8506	0.947(0.485,1.851)	0.99234
	ENSG00000156671	10	SAMD8	76900612	rs7077767	10	76880322	T	C	0.054672	-0.0119873	0.0759055	0.874516	0.137155	0.0175975	6.4921e-15	-0.0874002	0.553544	0.874542	0.340864	13	-1.17235	0.997546	0.91631	0.30964	2.71162	0.916(0.31,2.712)	0.99234
	ENSG00000136997	8	MYC	128750677	rs10956401	8	129002419	A	G	0.385686	0.00570732	0.0362328	0.874836	-0.0808447	0.00909205	6.01271e-19	-0.0705961	0.448248	0.874856	0.850877	20	-0.949162	0.80797	0.931838	0.387065	2.24335	0.932(0.387,2.243)	0.99234
	ENSG00000162692	1	VCAM1	101194953	rs12566489	1	101139367	T	C	0.202783	0.00641754	0.0410189	0.875676	-0.289136	0.00937474	7.17116e-209	-0.0221956	0.141869	0.875677	0.921128	20	-0.300259	0.255868	0.978049	0.740626	1.29158	0.978(0.741,1.292)	0.99234
	ENSG00000157020	3	SEC13	10348838	rs696221	3	10342876	C	T	0.451292	-0.00533765	0.0345522	0.877231	0.36157	0.00852685	0	-0.0147624	0.0955623	0.877232	0.771208	20	-0.202065	0.17254	0.985346	0.817042	1.18832	0.985(0.817,1.188)	0.99234
	ENSG00000120725	5	SIL1	138455827	rs10068786	5	138276944	T	C	0.261431	-0.00579367	0.0379588	0.87869	0.157137	0.00860374	1.60709e-74	-0.0368702	0.241574	0.878694	0.988387	20	-0.510355	0.436615	0.963801	0.600282	1.54746	0.964(0.6,1.547)	0.99234
	ENSG00000249915	5	PDCD6	312853	rs2721015	5	367655	C	T	0.332008	0.00554114	0.0367078	0.880013	0.247845	0.00910697	4.32779e-163	0.0223572	0.14811	0.880015	0.127408	20	-0.267938	0.312653	1.02261	0.764955	1.36705	1.023(0.765,1.367)	0.99234
	ENSG00000114650	3	SCAP	47486909	rs1872164	3	47415100	A	G	0.395626	0.00529363	0.0351647	0.88034	-0.307795	0.00795586	0	-0.0171986	0.114248	0.880341	0.794964	20	-0.241125	0.206727	0.982948	0.785744	1.22965	0.983(0.786,1.23)	0.99234
	ENSG00000113296	5	THBS4	79333122	rs256439	5	79366080	C	T	0.286282	-0.00584675	0.0401238	0.884144	-0.0627144	0.0091626	7.66901e-12	0.0932282	0.639931	0.88417	0.505396	20	-1.16104	1.34749	1.09771	0.313161	3.84777	1.098(0.313,3.848)	0.992761
	ENSG00000204842	12	ATXN2	111963749	rs117532831	12	112037450	A	G	0.109344	-0.00950768	0.0656928	0.884925	-0.128368	0.014877	6.21069e-18	0.0740659	0.511826	0.884941	0.046313	11	-0.929113	1.07724	1.07688	0.394904	2.93658	1.077(0.395,2.937)	0.992761
	ENSG00000115806	2	GORASP2	171804306	rs17281735	2	171803639	G	T	0.282306	-0.00557735	0.0386946	0.885392	0.098311	0.00890321	2.39109e-28	-0.0567317	0.393627	0.885401	0.547915	20	-0.828241	0.714777	0.944848	0.436817	2.04373	0.945(0.437,2.044)	0.992761
	ENSG00000138802	4	SEC24B	110408490	rs68041341	4	110453021	T	A	0.136183	0.00660573	0.046837	0.887841	0.0740537	0.0110992	2.52341e-11	0.0892019	0.632615	0.887866	0.456228	20	-1.15072	1.32913	1.0933	0.316408	3.77775	1.093(0.316,3.778)	0.992761
	ENSG00000198171	20	DDRGK1	3178163	rs57534080	20	3189091	T	C	0.220676	0.00590163	0.0421133	0.888552	-0.392096	0.00933058	0	-0.0150515	0.107406	0.888552	0.238183	20	-0.225567	0.195464	0.985061	0.798063	1.21588	0.985(0.798,1.216)	0.992761
	ENSG00000175895	8	PLEKHF2	96157472	rs80086542	8	96225548	A	G	0.170974	0.00674369	0.0487453	0.889967	0.303199	0.0107231	6.93674e-176	0.0222418	0.160772	0.889969	0.555364	20	-0.292871	0.337355	1.02249	0.746118	1.40124	1.022(0.746,1.401)	0.992761
	ENSG00000001084	6	GCLC	53421953	rs661603	6	53370107	C	T	0.411531	-0.00479963	0.0353919	0.892127	-0.142703	0.00798096	1.67632e-71	0.0336337	0.248019	0.89213	0.013206	20	-0.452484	0.519751	1.03421	0.636047	1.68161	1.034(0.636,1.682)	0.992761
	ENSG00000106366	7	SERPINE1	100776458	rs2227667	7	100774749	G	A	0.209742	0.00604954	0.0447	0.892346	-0.0909017	0.0097321	9.59713e-21	-0.0665503	0.491791	0.892357	0.316716	20	-1.03046	0.89736	0.935616	0.356843	2.45312	0.936(0.357,2.453)	0.992761
	ENSG00000155660	7	PDIA4	148712943	rs112634954	7	148721863	A	G	0.215706	0.00601428	0.0445885	0.892703	0.237272	0.0110002	3.4518e-103	0.0253477	0.187925	0.892706	0.00764681	20	-0.342985	0.393681	1.02567	0.709649	1.48243	1.026(0.71,1.482)	0.992761
	ENSG00000164463	5	CREBRF	172524823	rs255302	5	172587274	T	G	0.507952	0.00464714	0.034965	0.894266	-0.348887	0.00939922	1.40288e-301	-0.0133199	0.100219	0.894266	0.778037	20	-0.209749	0.183109	0.986768	0.810788	1.20095	0.987(0.811,1.201)	0.992761
	ENSG00000186298	12	PPP1CC	111169114	rs34648858	12	111255676	A	G	0.106362	-0.00856221	0.0645715	0.894509	0.230275	0.0150053	3.75551e-53	-0.0371826	0.280421	0.894513	0.525854	20	-0.586808	0.512443	0.9635	0.5561	1.66936	0.964(0.556,1.669)	0.992761
	ENSG00000177889	12	UBE2N	93817743	rs10777512	12	93859770	C	T	0.347913	0.00465175	0.0367348	0.899233	-0.0682647	0.00845844	6.99542e-16	-0.0681428	0.538189	0.899245	0.479285	20	-1.12299	0.986708	0.934127	0.325305	2.68239	0.934(0.325,2.682)	0.992761
	ENSG00000215114	8	UBXN2B	59343941	rs34652279	8	59318052	T	A	0.349901	-0.00437949	0.0354154	0.901584	0.230023	0.015072	1.37831e-52	-0.0190393	0.153969	0.901587	0.175575	20	-0.320819	0.28274	0.981141	0.725555	1.32676	0.981(0.726,1.327)	0.992761
	ENSG00000171552	20	BCL2L1	30282023	rs6088962	20	30268184	T	C	0.232604	0.00501643	0.0413072	0.903341	-0.0738765	0.0101814	3.9871e-13	-0.0679029	0.559216	0.903354	0.843175	20	-1.16397	1.02816	0.934351	0.312245	2.79592	0.934(0.312,2.796)	0.992761
	ENSG00000079999	19	KEAP1	10605606	rs79342923	19	10605636	T	G	0.116302	0.0071086	0.0603587	0.906248	0.103758	0.0141029	1.8781e-13	0.0685116	0.581803	0.90626	0.632741	18	-1.07182	1.20885	1.07091	0.342384	3.34962	1.071(0.342,3.35)	0.992761
	ENSG00000101294	20	HM13	30129800	rs6119489	20	30109994	T	C	0.157058	-0.00542067	0.0461331	0.906463	0.525308	0.0104697	0	-0.010319	0.0878215	0.906464	0.739442	20	-0.182449	0.161811	0.989734	0.833227	1.17564	0.99(0.833,1.176)	0.992761
	ENSG00000123700	17	KCNJ2	68170501	rs9890133	17	68169005	G	A	0.12326	0.0062528	0.0544521	0.908579	-0.25597	0.0124572	8.01994e-94	-0.0244279	0.212732	0.90858	0.405126	19	-0.441383	0.392527	0.975868	0.643147	1.48072	0.976(0.643,1.481)	0.992761
	ENSG00000111885	6	MAN1A1	119584650	rs6932241	6	119657175	C	T	0.382704	-0.00413297	0.0360557	0.90874	-0.30605	0.00816411	1.48342e-307	0.0135042	0.11781	0.908741	0.272275	20	-0.217403	0.244412	1.0136	0.804605	1.27687	1.014(0.805,1.277)	0.992761
	ENSG00000172216	20	CEBPB	48808294	rs1889236	20	48905967	T	C	0.246521	-0.00452176	0.0395705	0.909023	-0.146691	0.00918009	1.7842e-57	0.0308252	0.269762	0.909025	0.644406	20	-0.497908	0.559559	1.03131	0.607801	1.7499	1.031(0.608,1.75)	0.992761
	ENSG00000170345	14	FOS	75747205	rs7149592	14	75723668	T	C	0.152087	-0.00518499	0.0458134	0.909891	0.0657276	0.0106576	6.951e-10	-0.0788861	0.697137	0.909906	0.748876	13	-1.44527	1.2875	0.924145	0.235681	3.62372	0.924(0.236,3.624)	0.992761
	ENSG00000143183	1	TMCO1	165746512	rs75582843	1	165748493	T	C	0.322068	0.00434827	0.0386233	0.910362	-0.0892775	0.00928253	6.72542e-22	-0.0487051	0.432651	0.910369	0.175661	20	-0.896701	0.799291	0.952462	0.407913	2.22396	0.952(0.408,2.224)	0.992761
	ENSG00000139173	12	TMEM117	44506657	rs12371940	12	44319060	C	T	0.0427435	-0.00814858	0.0727047	0.910762	-0.146874	0.0183689	1.2874e-15	0.05548	0.495062	0.91077	0.674194	20	-0.914842	1.0258	1.05705	0.40058	2.78933	1.057(0.401,2.789)	0.992761
	ENSG00000104388	8	RAB2A	61482801	rs7820349	8	61421955	G	A	0.217694	0.00462927	0.0414147	0.910999	0.376765	0.00914562	0	0.0122869	0.109922	0.910999	0.681651	20	-0.20316	0.227734	1.01236	0.816147	1.25575	1.012(0.816,1.256)	0.992761
	ENSG00000184164	22	CRELD2	50316501	rs9616376	22	50310829	G	A	0.198807	0.0048629	0.0437858	0.911568	0.718227	0.00929002	0	0.00677069	0.0609638	0.911568	0.263466	20	-0.112718	0.12626	1.00679	0.893402	1.13458	1.007(0.893,1.135)	0.992761
	ENSG00000144895	3	EIF2A	150283247	rs6440683	3	150295376	C	T	0.143141	0.00546434	0.0492825	0.911713	-0.527585	0.0109073	0	-0.0103573	0.0934116	0.911713	0.690292	20	-0.193444	0.172729	0.989696	0.824116	1.18854	0.99(0.824,1.189)	0.992761
	ENSG00000198855	12	FICD	108914288	rs715447	12	108946718	G	C	0.424453	0.00389364	0.0352438	0.912031	0.0657099	0.00810733	5.27461e-16	0.0592551	0.536404	0.912039	0.198192	20	-0.992097	1.11061	1.06105	0.370798	3.0362	1.061(0.371,3.036)	0.992761
	ENSG00000124155	20	PIGT	44049795	rs6104154	20	44055963	A	G	0.172962	0.0052702	0.0484498	0.91338	0.211848	0.0101328	4.60479e-97	0.0248773	0.228704	0.913381	0.847783	18	-0.423383	0.473137	1.02519	0.654828	1.60502	1.025(0.655,1.605)	0.99291
	ENSG00000110799	12	VWF	6145988	rs4764482	12	6169733	C	T	0.527833	-0.00364334	0.0342698	0.915334	0.311101	0.0078027	0	-0.0117111	0.110157	0.915334	0.60167	20	-0.227619	0.204197	0.988357	0.796428	1.22654	0.988(0.796,1.227)	0.993028
	ENSG00000082641	17	NFE2L1	46132270	rs757352	17	46097153	A	G	0.21173	-0.00446393	0.0428528	0.917035	0.226371	0.0145175	8.12282e-55	-0.0197196	0.189308	0.917037	0.347077	20	-0.390763	0.351324	0.980474	0.67654	1.42095	0.98(0.677,1.421)	0.993028
	ENSG00000140612	15	SEC11A	85236361	rs7179643	15	85361042	T	G	0.269384	0.0042498	0.0408308	0.917103	0.183094	0.00913388	2.2051e-89	0.023211	0.223008	0.917104	0.549098	20	-0.413885	0.460307	1.02348	0.661077	1.58456	1.023(0.661,1.585)	0.993028
	ENSG00000171853	2	TRAPPC12	3436155	rs4641971	2	3481857	T	G	0.410537	0.00353529	0.0354644	0.920594	0.550741	0.00848441	0	0.00641915	0.0643941	0.920594	0.199176	20	-0.119793	0.132632	1.00644	0.887104	1.14183	1.006(0.887,1.142)	0.993578
	ENSG00000132109	11	TRIM21	4410526	rs926101	11	4411241	T	C	0.12326	-0.00488503	0.0501721	0.922436	-0.177817	0.0110915	7.66306e-58	0.0274722	0.28216	0.922438	0.746693	19	-0.525561	0.580506	1.02785	0.591223	1.78694	1.028(0.591,1.787)	0.993578
	ENSG00000136827	9	TOR1A	132580818	rs7025992	9	132557210	C	T	0.368787	0.00361658	0.0376926	0.923561	-0.314521	0.00835546	0	-0.0114987	0.119842	0.923561	0.494661	20	-0.246389	0.223392	0.988567	0.781618	1.25031	0.989(0.782,1.25)	0.993578
	ENSG00000141385	18	AFG3L2	12353128	rs74593099	18	12329924	A	G	0.0924453	0.00549515	0.0608641	0.92806	-0.145764	0.0132342	3.2642e-28	-0.037699	0.417567	0.928063	0.637584	20	-0.85613	0.780732	0.963003	0.424803	2.18307	0.963(0.425,2.183)	0.993578
	ENSG00000142892	1	PIGK	77619895	rs1048575	1	77558057	C	G	0.245527	0.00373699	0.0418739	0.928888	0.246885	0.00935794	2.18166e-153	0.0151365	0.16961	0.928889	0.866594	20	-0.317299	0.347572	1.01525	0.728113	1.41563	1.015(0.728,1.416)	0.993578
	ENSG00000123104	12	ITPR2	26738236	rs74976642	12	26998022	A	G	0.106362	0.0051187	0.0579636	0.929631	-0.577532	0.0130474	0	-0.00886305	0.100364	0.929631	0.20357	20	-0.205576	0.18785	0.991176	0.814178	1.20665	0.991(0.814,1.207)	0.993578
	ENSG00000164924	8	YWHAZ	101947184	rs964917	8	101937455	T	C	0.427435	0.00318112	0.0365409	0.930627	0.228465	0.00834334	4.38374e-165	0.0139239	0.159942	0.930627	0.47559	20	-0.299562	0.32741	1.01402	0.741142	1.38737	1.014(0.741,1.387)	0.993578
	ENSG00000137462	4	TLR2	154624751	rs1439164	4	154622649	C	T	0.197813	-0.00412058	0.0478726	0.931408	0.158519	0.0164231	4.81123e-22	-0.0259943	0.302012	0.93141	0.840603	20	-0.617938	0.565949	0.974341	0.539055	1.76112	0.974(0.539,1.761)	0.993578
	ENSG00000007171	17	NOS2	26105658	rs3751972	17	26206414	C	A	0.242545	-0.0034502	0.0403635	0.931881	0.156786	0.00963772	1.66508e-59	-0.0220058	0.257446	0.931882	0.753207	20	-0.5266	0.482588	0.978235	0.59061	1.62026	0.978(0.591,1.62)	0.993578
	ENSG00000196689	17	TRPV1	3484565	rs222741	17	3508880	G	A	0.267396	0.00329764	0.0386727	0.932046	0.0818535	0.00912342	2.91709e-19	0.040287	0.472483	0.932049	0.390252	20	-0.88578	0.966354	1.04111	0.412393	2.62834	1.041(0.412,2.628)	0.993578
	ENSG00000104687	8	GSR	30560513	rs3594	8	30535660	A	C	0.406561	0.00297336	0.0360424	0.934252	0.394374	0.00798361	0	0.00753943	0.0913913	0.934252	0.914067	20	-0.171588	0.186666	1.00757	0.842327	1.20523	1.008(0.842,1.205)	0.993578
	ENSG00000140350	15	ANP32A	69092055	rs72750358	15	69033582	C	T	0.461233	-0.00274185	0.034576	0.936795	0.073335	0.0118857	6.82899e-10	-0.037388	0.47152	0.9368	0.639333	9	-0.961567	0.886791	0.963302	0.382293	2.42733	0.963(0.382,2.427)	0.993578
	ENSG00000119487	9	MAPKAP1	128334592	rs509753	9	128303518	G	A	0.477137	-0.00271793	0.0345624	0.93732	0.104654	0.00797653	2.5227e-39	-0.0259707	0.330261	0.937321	0.722289	20	-0.673282	0.621341	0.974364	0.510032	1.86142	0.974(0.51,1.861)	0.993578
	ENSG00000087502	12	ERGIC2	29512203	rs12817578	12	29500012	A	T	0.16501	-0.00394986	0.0507469	0.93796	-0.253778	0.0116239	1.1426e-105	0.0155643	0.199967	0.93796	0.510266	20	-0.376371	0.4075	1.01569	0.686348	1.50305	1.016(0.686,1.503)	0.993578
	ENSG00000134882	13	UBAC2	99945858	rs9517704	13	100033061	A	T	0.284294	-0.00289941	0.0374135	0.938229	0.146002	0.00858258	6.76033e-65	-0.0198587	0.256257	0.938229	0.547589	20	-0.522122	0.482405	0.980337	0.59326	1.61997	0.98(0.593,1.62)	0.993578
	ENSG00000177706	7	FAM20C	246840	rs13308834	7	82204	G	A	0.478131	-0.00282164	0.0374405	0.939926	-0.259775	0.00857558	1.4436e-201	0.0108619	0.144127	0.939926	0.926234	20	-0.271627	0.293351	1.01092	0.762138	1.34091	1.011(0.762,1.341)	0.993578
	ENSG00000171302	17	CANT1	76996874	rs17739056	17	76995205	C	T	0.106362	0.00412487	0.056042	0.941326	-0.313111	0.0120276	2.10691e-149	-0.0131738	0.178985	0.941326	0.58244	20	-0.363984	0.337637	0.986913	0.694902	1.40163	0.987(0.695,1.402)	0.993578
	ENSG00000172375	11	C2CD2L	118981080	rs617948	11	118981025	A	G	0.529821	-0.00255434	0.0349157	0.941681	0.361169	0.00768156	0	-0.00707243	0.0966743	0.941681	0.708563	20	-0.196554	0.182409	0.992953	0.821557	1.20011	0.993(0.822,1.2)	0.993578
	ENSG00000165280	9	VCP	35064653	rs504082	9	35079361	G	T	0.317097	0.00276734	0.0379076	0.941805	-0.317564	0.00847854	4.97971e-307	-0.00871427	0.11937	0.941805	0.544578	20	-0.242679	0.225251	0.991324	0.784523	1.25264	0.991(0.785,1.253)	0.993578
	ENSG00000135018	9	UBQLN1	86298998	rs4146740	9	86244075	A	C	0.222664	-0.00293812	0.0402632	0.941828	0.104199	0.00923632	1.62141e-29	-0.0281973	0.386416	0.941829	0.277845	20	-0.785573	0.729178	0.972197	0.455859	2.07338	0.972(0.456,2.073)	0.993578
	ENSG00000036257	2	CUL3	225392488	rs3768897	2	225338022	A	G	0.131213	0.00371355	0.0519845	0.943051	0.165586	0.0121178	1.65208e-42	0.0224268	0.313948	0.943052	0.703161	20	-0.592911	0.637765	1.02268	0.552716	1.89225	1.023(0.553,1.892)	0.993578
	ENSG00000122557	7	HERPUD2	35703507	rs2392376	7	35690812	T	C	0.489066	0.00242393	0.0345942	0.94414	0.223047	0.00786525	6.57552e-177	0.0108674	0.155099	0.94414	0.814071	20	-0.293127	0.314861	1.01093	0.745928	1.37007	1.011(0.746,1.37)	0.993578
	ENSG00000116157	1	GPX7	53071383	rs835342	1	53064034	G	A	0.418489	0.00225797	0.0342221	0.947394	0.612237	0.00719435	0	0.00368806	0.0558969	0.947394	0.381113	20	-0.10587	0.113246	1.00369	0.899542	1.11991	1.004(0.9,1.12)	0.994565
	ENSG00000062716	17	VMP1	57852084	rs2136695	17	57842765	C	T	0.150099	-0.00309918	0.0481503	0.94868	0.142015	0.0122727	5.74019e-31	-0.0218229	0.339057	0.948681	0.528794	20	-0.686375	0.642729	0.978413	0.503398	1.90166	0.978(0.503,1.902)	0.994565
	ENSG00000105726	19	ATP13A1	19765254	rs58434384	19	19786099	G	A	0.082505	0.0041808	0.0649796	0.948699	0.7374	0.0143534	0	0.00566965	0.08812	0.948699	0.340799	20	-0.167046	0.178385	1.00569	0.846161	1.19529	1.006(0.846,1.195)	0.994565
	ENSG00000198794	15	SCAMP5	75281698	rs74023908	15	75310710	C	T	0.0864811	-0.00405296	0.0662351	0.951207	0.100184	0.0135088	1.2053e-13	-0.0404553	0.661159	0.951209	0.567462	13	-1.33633	1.25542	0.960352	0.262809	3.5093	0.96(0.263,3.509)	0.994644
	ENSG00000087088	19	BAX	49461563	rs11668424	19	49457040	A	G	0.383698	-0.00220849	0.0362106	0.951367	-0.247683	0.00824452	2.769e-198	0.00891659	0.146198	0.951367	0.557419	20	-0.277631	0.295465	1.00896	0.757576	1.34375	1.009(0.758,1.344)	0.994644
	ENSG00000055208	6	TAB2	149636263	rs62425952	6	149563894	T	C	0.152087	-0.00274295	0.0466295	0.953092	-0.164688	0.0104095	2.22916e-56	0.0166554	0.283141	0.953092	0.97959	20	-0.538301	0.571612	1.01679	0.583739	1.77112	1.017(0.584,1.771)	0.994644
	ENSG00000099797	19	TECR	14652344	rs10412426	19	14669419	C	T	0.45825	-0.00211133	0.0362875	0.953603	-0.12437	0.0110642	2.57038e-29	0.0169762	0.291773	0.953603	0.150251	8	-0.554899	0.588851	1.01712	0.57413	1.80192	1.017(0.574,1.802)	0.994644
	ENSG00000158828	1	PINK1	20968976	rs7520498	1	20949628	T	C	0.296223	-0.00203391	0.0369224	0.95607	0.234956	0.00845206	4.49761e-170	-0.00865654	0.157146	0.95607	0.00411675	20	-0.316663	0.29935	0.991381	0.728576	1.34898	0.991(0.729,1.349)	0.995957
	ENSG00000109320	4	NFKB1	103480472	rs11097787	4	103407342	T	C	0.398608	-0.0018176	0.0361511	0.959901	0.18313	0.00821925	5.6989e-110	-0.00992521	0.197407	0.959901	0.0859559	20	-0.396843	0.376993	0.990124	0.67244	1.45789	0.99(0.672,1.458)	0.998685
	ENSG00000170348	14	TMED10	75620753	rs17103088	14	75696916	G	A	0.218688	-0.00214111	0.0439622	0.961156	-0.132183	0.0140128	3.98521e-21	0.0161981	0.332592	0.961156	0.992461	20	-0.635682	0.668078	1.01633	0.529574	1.95049	1.016(0.53,1.95)	0.99873
	ENSG00000196218	19	RYR1	39001271	rs908644	19	39018728	G	C	0.163022	-0.00206955	0.0477452	0.965426	0.255352	0.010966	6.17488e-120	-0.00810469	0.186978	0.965426	0.243033	20	-0.374582	0.358372	0.991928	0.687577	1.431	0.992(0.688,1.431)	0.99874
	ENSG00000167658	19	EEF2	3980760	rs117466842	19	3971208	C	T	0.0506958	0.00406279	0.100304	0.967691	-0.277665	0.0250451	1.45719e-28	-0.014632	0.361245	0.967691	0.268015	7	-0.722672	0.693408	0.985475	0.485453	2.00052	0.985(0.485,2.001)	0.99874
	ENSG00000118217	1	ATF6	161834972	rs1136046	1	161928771	A	G	0.100398	0.00169571	0.0541644	0.975025	0.564033	0.0118447	0	0.00300639	0.0960305	0.975025	0.3459	20	-0.185213	0.191226	1.00301	0.830927	1.21073	1.003(0.831,1.211)	0.99874
	ENSG00000134291	12	TMEM106C	48360006	rs4760674	12	48357014	A	C	0.406561	0.00109806	0.0357541	0.9755	0.31944	0.00792388	0	0.00343744	0.111927	0.9755	0.387189	20	-0.215939	0.222814	1.00344	0.805784	1.24959	1.003(0.806,1.25)	0.99874
	ENSG00000107651	10	SEC23IP	121677118	rs12241478	10	121667020	C	T	0.301193	-0.00109268	0.0382385	0.977203	-0.0961127	0.00869956	2.24148e-28	0.0113688	0.397851	0.977203	0.763919	20	-0.768419	0.791157	1.01143	0.463746	2.20595	1.011(0.464,2.206)	0.99874
	ENSG00000178301	11	AQP11	77310918	rs11237236	11	77312790	A	G	0.214712	0.0011277	0.0419355	0.978546	0.101969	0.00960067	2.38001e-26	0.0110593	0.41126	0.978546	0.690655	20	-0.79501	0.817129	1.01112	0.451577	2.26399	1.011(0.452,2.264)	0.99874
	ENSG00000136874	9	STX17	102700766	rs1342147	9	102844842	A	C	0.446322	0.000858487	0.0344251	0.980105	0.200172	0.0078703	1.06665e-142	0.00428876	0.171978	0.980105	0.520637	20	-0.332788	0.341366	1.0043	0.716922	1.40687	1.004(0.717,1.407)	0.99874
	ENSG00000172071	2	EIF2AK3	88891676	rs867529	2	88913273	C	G	0.298211	-0.000847395	0.039494	0.982882	0.090337	0.00881199	1.16401e-24	-0.00938037	0.437186	0.982882	0.633956	20	-0.866265	0.847504	0.990663	0.420519	2.33381	0.991(0.421,2.334)	0.99874
	ENSG00000055118	7	KCNH2	150658726	rs2072412	7	150647970	G	C	0.294235	-0.000910389	0.0432139	0.983192	0.16693	0.00926327	1.3428e-72	-0.00545373	0.258875	0.983192	0.824796	20	-0.512849	0.501941	0.994561	0.598787	1.65192	0.995(0.599,1.652)	0.99874
	ENSG00000171862	10	PTEN	89677278	rs2785080	10	89788889	G	C	0.247515	-0.000825618	0.0394337	0.983296	0.114616	0.0173913	4.3864e-11	-0.00720337	0.344053	0.983296	0.105052	20	-0.681547	0.667141	0.992823	0.505834	1.94866	0.993(0.506,1.949)	0.99874
	ENSG00000005381	17	MPO	56352756	rs12940119	17	56373613	C	T	0.172962	0.00101786	0.0502068	0.983825	0.409196	0.0111353	1.26985e-295	0.00248747	0.122696	0.983825	0.213023	20	-0.237997	0.242972	1.00249	0.788205	1.27503	1.002(0.788,1.275)	0.99874
	ENSG00000143222	1	UFC1	161125606	rs7512012	1	161162173	G	A	0.394632	0.000703517	0.0354742	0.984178	0.0509852	0.00809084	2.9459e-10	0.0137985	0.695777	0.984178	0.987929	20	-1.34992	1.37752	1.01389	0.25926	3.96506	1.014(0.259,3.965)	0.99874
	ENSG00000130175	19	PRKCSH	11553946	rs160841	19	11559158	G	A	0.0994036	0.00134292	0.0683743	0.98433	0.256005	0.0154384	9.34219e-62	0.0052457	0.267082	0.98433	0.879815	20	-0.518235	0.528726	1.00526	0.595571	1.69677	1.005(0.596,1.697)	0.99874
	ENSG00000158615	1	PPP1R15B	204376717	rs56174638	1	204391371	A	G	0.114314	-0.00105252	0.0555759	0.98489	-0.0828385	0.0126032	4.93779e-11	0.0127057	0.670898	0.98489	0.806485	20	-1.30225	1.32767	1.01279	0.271918	3.77223	1.013(0.272,3.772)	0.99874
	ENSG00000082701	3	GSK3B	119676717	rs6765483	3	119927508	T	A	0.22167	0.000713385	0.0393889	0.98555	0.302755	0.00891259	6.30801e-253	0.00235631	0.130101	0.98555	0.247455	20	-0.252642	0.257354	1.00236	0.776746	1.2935	1.002(0.777,1.294)	0.99874
	ENSG00000100075	22	SLC25A1	19164719	rs1780638	22	19177522	A	G	0.374751	0.000656014	0.0363881	0.985616	0.266471	0.00828412	5.19271e-227	0.00246186	0.136555	0.985616	0.979403	20	-0.265186	0.27011	1.00246	0.767063	1.31011	1.002(0.767,1.31)	0.99874
	ENSG00000107262	9	BAG1	33256289	rs62542690	9	33252455	A	G	0.0666004	0.000993924	0.0628534	0.987383	0.358673	0.0148419	5.04507e-129	0.00277111	0.175239	0.987383	0.604015	9	-0.340697	0.34624	1.00277	0.711274	1.41374	1.003(0.711,1.414)	0.99874
	ENSG00000106462	7	EZH2	148542944	rs243484	7	148448655	T	G	0.326044	0.000551968	0.0374738	0.988248	-0.195363	0.00907889	1.04711e-102	-0.00282534	0.191816	0.988248	0.170774	20	-0.378785	0.373134	0.997179	0.684693	1.45228	0.997(0.685,1.452)	0.99874
	ENSG00000067900	18	ROCK1	18610756	rs11876064	18	18708141	T	A	0.0516899	0.00148332	0.102515	0.988456	0.150213	0.0233628	1.2794e-10	0.00987472	0.682462	0.988456			-1.32775	1.3475	1.00992	0.265073	3.84779	1.01(0.265,3.848)	0.99874
	ENSG00000165861	14	ZFYVE1	73465039	rs35581508	14	73606086	A	G	0.180915	-0.00043617	0.0450994	0.992283	0.116722	0.0108714	6.85221e-27	-0.00373683	0.386383	0.992283	0.772699	20	-0.761048	0.753574	0.99627	0.467177	2.12458	0.996(0.467,2.125)	0.99874
	ENSG00000187498	13	COL4A1	110880407	rs2275843	13	110813532	A	G	0.161034	-0.000410262	0.0488149	0.993294	-0.217442	0.0108596	3.47163e-89	0.00188676	0.224496	0.993294	0.682275	20	-0.438125	0.441899	1.00189	0.645245	1.55566	1.002(0.645,1.556)	0.99874
	ENSG00000182718	15	ANXA2	60667207	rs62004990	15	60686631	T	C	0.271372	0.000342833	0.0419064	0.993473	0.28109	0.00918197	8.16854e-206	0.00121966	0.149086	0.993473	0.553109	20	-0.290989	0.293428	1.00122	0.747524	1.34102	1.001(0.748,1.341)	0.99874
	ENSG00000156711	6	MAPK13	36101714	rs763096	6	36100669	A	G	0.387674	0.000284434	0.0363629	0.993759	-0.132399	0.00821883	2.1985e-58	-0.00214831	0.274647	0.993759	0.277745	20	-0.540456	0.53616	0.997854	0.582482	1.70943	0.998(0.582,1.709)	0.99874
	ENSG00000070018	12	LRP6	12344452	rs10845503	12	12428341	A	G	0.27336	0.000282154	0.0382935	0.994121	0.179263	0.00870938	3.91417e-94	0.00157396	0.213616	0.994121	0.78221	20	-0.417113	0.420261	1.00158	0.658946	1.52236	1.002(0.659,1.522)	0.99874
	ENSG00000065615	6	CYB5R4	84619754	rs13220487	6	84663218	T	C	0.0467197	0.000517077	0.0734707	0.994385	0.122396	0.018792	7.35659e-11	0.00422462	0.60027	0.994385	0.408757	4	-1.1723	1.18075	1.00423	0.309652	3.25683	1.004(0.31,3.257)	0.99874
	ENSG00000159640	17	ACE	61576813	rs4277405	17	61548918	C	T	0.369781	0.000161638	0.035645	0.996382	0.0748534	0.00878519	1.58999e-17	0.0021594	0.476197	0.996382	0.990438	19	-0.931187	0.935506	1.00216	0.394086	2.5485	1.002(0.394,2.549)	0.99874
	ENSG00000089248	12	ERP29	112456187	rs11066119	12	112434504	G	A	0.0944334	-0.000248608	0.0586596	0.996618	-0.219755	0.0142799	1.9341e-53	0.00113129	0.266931	0.996618	0.514972	18	-0.522053	0.524316	1.00113	0.593301	1.6893	1.001(0.593,1.689)	0.99874
	ENSG00000162999	2	DUSP19	183954010	rs2705721	2	183990288	T	C	0.0497018	0.000359318	0.087399	0.99672	0.404813	0.0293662	3.13771e-43	0.000887614	0.2159	0.99672	0.496723	20	-0.422276	0.424052	1.00089	0.655553	1.52814	1.001(0.656,1.528)	0.99874
	ENSG00000198833	6	UBE2J1	90049455	rs12209311	6	90067072	C	T	0.084493	-0.000246605	0.0703443	0.997203	0.394573	0.0165541	1.43525e-125	-0.000624994	0.17828	0.997203	0.798942	20	-0.350054	0.348804	0.999375	0.70465	1.41737	0.999(0.705,1.417)	0.99874
	ENSG00000051108	16	HERPUD1	56971879	rs8044753	16	56883438	G	A	0.498012	-0.000109487	0.0353437	0.997528	0.215958	0.00787433	1.35822e-165	-0.000506982	0.16366	0.997528	0.951372	20	-0.321281	0.320267	0.999493	0.72522	1.37749	0.999(0.725,1.377)	0.99874
	ENSG00000099194	10	SCD	102115736	rs1054411	10	102107251	G	C	0.398608	3.08005e-05	0.0353919	0.999306	0.122368	0.00813468	3.84923e-51	0.000251703	0.289224	0.999306	0.304163	20	-0.566627	0.567131	1.00025	0.567436	1.7632	1(0.567,1.763)	0.999306
